# Supplementary material
Source: PubMed Central journal article supplement (PMC11443819)
Supplement: NIHMS2009720-supplement-Supplementary_Information.pdf [file NIHMS2009720-supplement-Supplementary_Information.pdf]

**Supplementary information**

---

**A spatially resolved single-cell genomic atlas  
of the adult human breast**

---

In the format provided by the  
authors and unedited

# A spatially resolved single cell genomic atlas of the adult human breast

## Supplementary Information

Kumar, Nee, Wei, He, Nguyen et al.

|                                                                                            |    |
|--------------------------------------------------------------------------------------------|----|
| Supplementary Information Figure 1 – FACS Gating strategy for isolating live cells .....   | 2  |
| Supplementary Table 1 – Breast Atlas Tissue Samples and Clinical Metadata .....            | 3  |
| Supplementary Table 2 – Single Cell RNA-seq Quality Control Metrics .....                  | 6  |
| Supplementary Table 3 – Top Marker Genes Expressed in Major Breast Cell Types.....         | 9  |
| Supplementary Table 4 – Top Marker Genes Expressed in Major Breast Nuclei Cell Types ..... | 11 |
| Supplementary Table 5 – Quality Control Metrics for Spatial Transcriptomics Data.....      | 13 |
| Supplementary Table 6 – Custom Targeted Gene Panel for smFISH (Resolve) .....              | 14 |
| Supplementary Table 7 – Quality Control Metrics for smFISH (Resolve) Data .....            | 15 |
| Supplementary Table 8 – Breast Tissue Samples for CODEX .....                              | 16 |
| Supplementary Table 9 – CODEX 34-Antibody Panel Design.....                                | 17 |
| Supplementary Table 10 – Top Gene Markers Expressed for Breast Cell States.....            | 19 |
| Supplementary Table 11 – Quality Control Metrics for smFISH (MERFISH) Data .....           | 29 |
| Supplementary Table 12 – Custom Targeted Gene Panel for smFISH (MERFISH).....              | 30 |

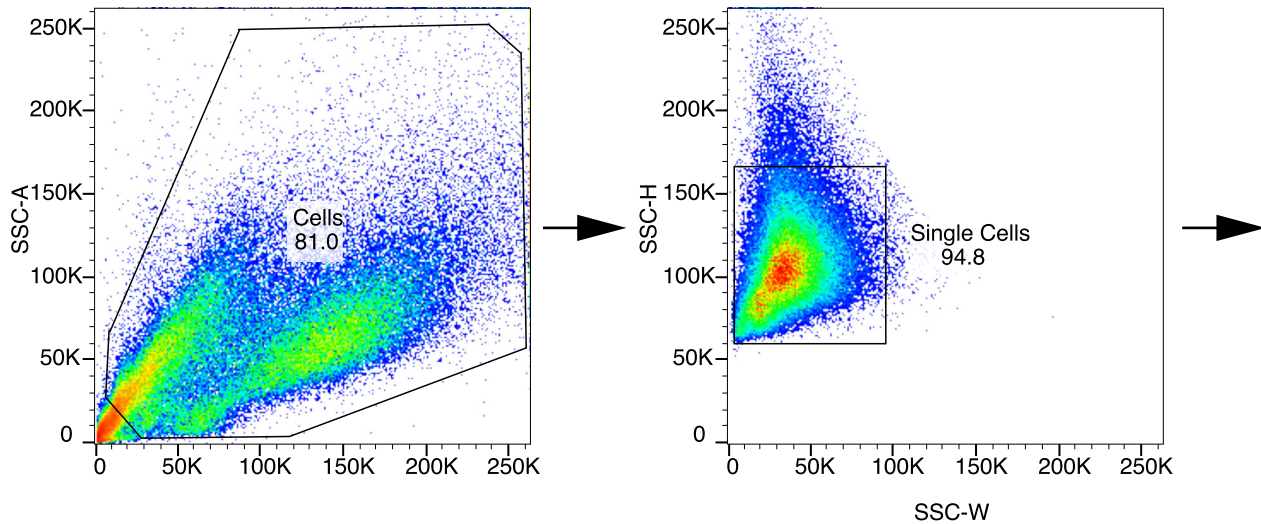

Ungated  
100000 events

Side-scatter (Height-width) gating of Cells  
81032 events

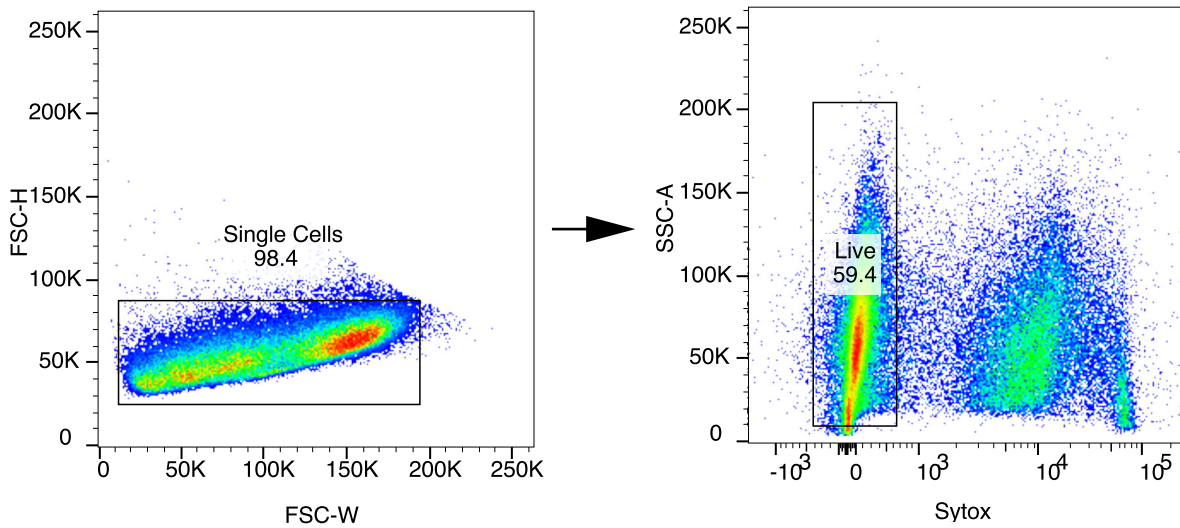

Forward-scatter (Height-width) of Single Cells  
76779 events

Sytox Gating of Live Cells  
75529 events

### Supplementary Information Figure 1 – FACS Gating strategy for isolating live cells.

A subset of breast tissue samples (HBCA14-24) were FACS sorted to enrich for live cells by staining with Sytox live cell stain and gating positive cells. An example of this gating strategy is shown, in which cells are gated by Side Scatter Area (SSC-A) followed by side-scatter height (SSC-H) and side scatter width (SSC-W) to identify single cell events. The cells were then gated by Forward Scatter Height (FSC-H) and Forward-Scatter Width (FSC-W) to enrich single cell events. Finally live cells were gated from dead cells using Sytox live cell stain.

**Supplementary Table 1 – Breast Atlas Tissue Samples and Clinical Metadata**

| Sample ID | Patient ID | Institution | Tissue Source          | Age | Ethnicity        | Parity  | Menopause | BMI     | BMI Group  | Digestion Protocol | Prior Treatment                                                    |
|-----------|------------|-------------|------------------------|-----|------------------|---------|-----------|---------|------------|--------------------|--------------------------------------------------------------------|
| hbca_c01  | P01        | mda         | Cancer Mastectomy      | O   | caucasian        | 0       | post      | 27.11   | overweight | short              | chemotherapy (taxol)                                               |
| hbca_c02  | P02        | mda         | Cancer Mastectomy      | Y   | caucasian        | 1       | pre       | 24.59   | Normal     | short              | unknown                                                            |
| hbca_c03  | P03        | mda         | Cancer Mastectomy      | O   | caucasian        | unknown | post      | 37.01   | obese      | short              | none                                                               |
| hbca_c04  | P04        | mda         | Cancer Mastectomy      | O   | caucasian        | 1       | post      | 24.16   | Normal     | short              | none                                                               |
| hbca_c05  | P05        | mda         | Cancer Mastectomy      | Y   | caucasian        | 0       | pre       | 22.89   | Normal     | short              | none                                                               |
| hbca_c06  | P06        | mda         | Cancer Mastectomy      | Y   | caucasian        | 1       | pre       | 30.12   | obese      | short              | none                                                               |
| hbca_c07  | P07        | mda         | Cancer Mastectomy      | Y   | caucasian        | 0       | pre       | 27.69   | overweight | short              | targeted therapy (Talazoparib)                                     |
| hbca_c08  | P08        | mda         | Cancer Mastectomy      | O   | caucasian        | 1       | post      | 30.27   | obese      | short              | chemotherapy                                                       |
| hbca_c09  | P09        | mda         | Prophylatic Mastectomy | Y   | caucasian        | unknown | pre       | 23.09   | Normal     | short              | none                                                               |
| hbca_c10  | P09        | mda         | Prophylatic Mastectomy | Y   | caucasian        | unknown | pre       | 23.09   | Normal     | long               | none                                                               |
| hbca_c11  | P10        | mda         | Cancer Mastectomy      | Y   | caucasian        | 1       | pre       | 29.79   | overweight | short              | chemotherapy (taxol)                                               |
| hbca_c12  | P11        | mda         | Prophylatic Mastectomy | Y   | hispanic         | 0       | pre       | 22.75   | Normal     | short              | none                                                               |
| hbca_c13  | P11        | mda         | Prophylatic Mastectomy | Y   | hispanic         | 0       | pre       | 22.75   | Normal     | long               | none                                                               |
| hbca_c14  | P12        | uci         | Reduction Mammoplasty  | Y   | caucasian        | unknown | unknown   | 33.40   | obese      | long               | none                                                               |
| hbca_c15  | P12        | uci         | Reduction Mammoplasty  | Y   | caucasian        | unknown | unknown   | 33.40   | obese      | long               | none                                                               |
| hbca_c16  | P13        | uci         | Prophylatic Mastectomy | NA  | unknown          | 1       | post      | unknown | unknown    | long               | unknown                                                            |
| hbca_c17  | P13        | uci         | Prophylatic Mastectomy | NA  | unknown          | 1       | post      | unknown | unknown    | long               | unknown                                                            |
| hbca_c18  | P14        | uci         | Prophylatic Mastectomy | Y   | unknown          | unknown | unknown   | unknown | unknown    | long               | unknown                                                            |
| hbca_c19  | P15        | uci         | Reduction Mammoplasty  | Y   | caucasian        | unknown | pre       | 28.70   | overweight | long               | none                                                               |
| hbca_c20  | P16        | uci         | Reduction Mammoplasty  | Y   | caucasian        | unknown | unknown   | 27.70   | overweight | long               | none                                                               |
| hbca_c21  | P17        | uci         | Prophylatic Mastectomy | NA  | unknown          | 0       | pre       | unknown | unknown    | long               | unknown                                                            |
| hbca_c22  | P18        | uci         | Reduction Mammoplasty  | Y   | caucasian        | unknown | pre       | 32.40   | obese      | long               | none                                                               |
| hbca_c23  | P18        | uci         | Reduction Mammoplasty  | Y   | caucasian        | unknown | pre       | 32.40   | obese      | long               | none                                                               |
| hbca_c24  | P19        | uci         | Reduction Mammoplasty  | Y   | caucasian        | unknown | pre       | 32.20   | obese      | long               | none                                                               |
| hbca_c25  | P20        | mda         | Reduction Mammoplasty  | Y   | unknown          | 1       | post      | unknown | unknown    | short              | none                                                               |
| hbca_c26  | P20        | mda         | Reduction Mammoplasty  | Y   | unknown          | 1       | post      | unknown | unknown    | long               | none                                                               |
| hbca_c27  | P21        | mda         | Cancer Mastectomy      | Y   | caucasian        | 1       | pre       | 24.45   | Normal     | long               | chemotherapy (docetaxel, carboplatin, trastuzumab, and pertuzumab) |
| hbca_c28  | P22        | mda         | Cancer Mastectomy      | Y   | caucasian        | 0       | pre       | 29.52   | overweight | short              | none                                                               |
| hbca_c29  | P23        | mda         | Cancer Mastectomy      | Y   | caucasian        | 1       | pre       | 27.92   | overweight | short              | none                                                               |
| hbca_c30  | P23        | mda         | Cancer Mastectomy      | Y   | caucasian        | 1       | pre       | 27.92   | overweight | short              | none                                                               |
| hbca_c31  | P24        | mda         | Reduction Mammoplasty  | NA  | unknown          | unknown | unknown   | unknown | unknown    | medium             | unknown                                                            |
| hbca_c32  | P24        | mda         | Reduction Mammoplasty  | NA  | unknown          | unknown | unknown   | unknown | unknown    | long               | unknown                                                            |
| hbca_c33  | P25        | mda         | Cancer Mastectomy      | O   | african-american | unknown | post      | 25.43   | overweight | long               | none                                                               |
| hbca_c34  | P26        | mda         | Cancer Mastectomy      | Y   | caucasian        | 1       | pre       | 37.07   | obese      | long               | none                                                               |
| hbca_c35  | P27        | mda         | Cancer Mastectomy      | O   | caucasian        | 1       | post      | 22.97   | Normal     | short              | none                                                               |
| hbca_c36  | P28        | mda         | Cancer Mastectomy      | O   | caucasian        | unknown | post      | 32.29   | obese      | long               | none                                                               |
| hbca_c37  | P29        | mda         | Cancer Mastectomy      | O   | caucasian        | unknown | post      | 38.43   | obese      | long               | hormonal therapy (tamoxifen)                                       |
| hbca_c38  | P30        | mda         | Prophylatic Mastectomy | Y   | caucasian        | unknown | post      | 25.64   | overweight | long               | none                                                               |
| hbca_c39  | P31        | mda         | Cancer Mastectomy      | O   | caucasian        | 0       | post      | 24.19   | Normal     | long               | chemo(ddAC)                                                        |
| hbca_c40  | P37        | mda         | Cancer Mastectomy      | O   | caucasian        | unknown | post      | 25.45   | overweight | short              | unknown                                                            |
| hbca_c41  | P32        | mda         | Cancer Mastectomy      | Y   | caucasian        | 1       | pre       | 26.98   | overweight | long               | no previous therapy                                                |
| hbca_c42  | P33        | mda         | Cancer Mastectomy      | Y   | caucasian        | 1       | pre       | 26.76   | overweight | long               | chemotherapy (docetaxel, carboplatin, trastuzumab, and pertuzumab) |
| hbca_c43  | P34        | mda         | Cancer Mastectomy      | Y   | caucasian        | 1       | pre       | 20.80   | Normal     | long               | chemotherapy (taxol)                                               |
| hbca_c44  | P35        | mda         | Cancer Mastectomy      | Y   | caucasian        | 1       | pre       | 24.71   | Normal     | long               | hormonal therapy (tamoxifen)                                       |
| hbca_c45  | P36        | mda         | Cancer Mastectomy      | Y   | african-american | 0       | pre       | 33.84   | obese      | long               | chemotherapy (docetaxel, carboplatin, trastuzumab, and pertuzumab) |
| hbca_c46  | P42        | mda         | Cancer Mastectomy      | Y   | unknown          | 1       | pre       | 29.27   | overweight | short              | chemotherapy (docetaxel, carboplatin, trastuzumab, and pertuzumab) |
| hbca_c47  | P43        | mda         | Cancer Mastectomy      | Y   | unknown          | 1       | pre       | 22.66   | Normal     | short              | none                                                               |
| hbca_c48  | P43        | mda         | Cancer Mastectomy      | Y   | unknown          | 1       | pre       | 22.66   | Normal     | medium             | unknown                                                            |
| hbca_c49  | P43        | mda         | Cancer Mastectomy      | Y   | unknown          | 1       | pre       | 22.66   | Normal     | long               | unknown                                                            |
| hbca_c50  | P44        | bcm         | Reduction Mammoplasty  | O   | caucasian        | 0       | post      | 29.30   | overweight | long               | none                                                               |
| hbca_c51  | P44        | bcm         | Reduction Mammoplasty  | O   | caucasian        | 0       | post      | 29.30   | overweight | long               | none                                                               |
| hbca_c52  | P45        | bcm         | Reduction Mammoplasty  | Y   | caucasian        | 1       | pre       | 25.06   | overweight | medium             | none                                                               |
| hbca_c53  | P46        | bcm         | Reduction Mammoplasty  | Y   | caucasian        | 1       | pre       | 42.51   | obese      | medium             | none                                                               |
| hbca_c54  | P46        | bcm         | Reduction Mammoplasty  | Y   | caucasian        | 1       | pre       | 42.51   | obese      | medium             | none                                                               |
| hbca_c55  | P47        | bcm         | Reduction Mammoplasty  | Y   | african-american | 1       | pre       | 29.79   | overweight | medium             | none                                                               |
| hbca_c56  | P47        | bcm         | Reduction Mammoplasty  | Y   | african-american | 1       | pre       | 29.79   | overweight | medium             | none                                                               |
| hbca_c57  | P48        | bcm         | Reduction Mammoplasty  | Y   | african-american | 1       | pre       | 34.70   | obese      | medium             | none                                                               |
| hbca_c58  | P48        | bcm         | Reduction Mammoplasty  | Y   | african-american | 1       | pre       | 34.70   | obese      | medium             | none                                                               |
| hbca_c59  | P49        | bcm         | Reduction Mammoplasty  | Y   | african-american | 1       | pre       | 31.37   | obese      | medium             | none                                                               |
| hbca_c60  | P49        | bcm         | Reduction Mammoplasty  | Y   | african-american | 1       | pre       | 31.37   | obese      | medium             | none                                                               |
| hbca_c61  | P49        | bcm         | Reduction Mammoplasty  | Y   | african-american | 1       | pre       | 31.37   | obese      | medium             | none                                                               |
| hbca_c62  | P50        | bcm         | Reduction Mammoplasty  | Y   | african-american | 0       | pre       | 31.18   | obese      | medium             | none                                                               |
| hbca_c63  | P50        | bcm         | Reduction Mammoplasty  | Y   | african-american | 0       | pre       | 31.18   | obese      | medium             | none                                                               |
| hbca_c64  | P50        | bcm         | Reduction Mammoplasty  | Y   | african-american | 0       | pre       | 31.18   | obese      | medium             | none                                                               |
| hbca_c65  | P50        | bcm         | Reduction Mammoplasty  | Y   | african-american | 0       | pre       | 31.18   | obese      | medium             | none                                                               |

| Sample ID | Patient ID | Institution | Tissue Source            | Age | Ethnicity        | Parity  | Menopause | BMI   | BMI Group   | Digestion Protocol | Prior Treatment |
|-----------|------------|-------------|--------------------------|-----|------------------|---------|-----------|-------|-------------|--------------------|-----------------|
| hbca_c66  | P51        | bcm         | Reduction Mammoplasty Y  |     | african-american | unknown | pre       | 30.61 | obese       | medium             | none            |
| hbca_c67  | P51        | bcm         | Reduction Mammoplasty Y  |     | african-american | unknown | pre       | 30.61 | obese       | medium             | none            |
| hbca_c68  | P51        | bcm         | Reduction Mammoplasty Y  |     | african-american | unknown | pre       | 30.61 | obese       | medium             | none            |
| hbca_c69  | P51        | bcm         | Reduction Mammoplasty Y  |     | african-american | unknown | pre       | 30.61 | obese       | medium             | none            |
| hbca_c70  | P52        | bcm         | Reduction Mammoplasty Y  |     | african-american | 1       | pre       | 39.89 | obese       | medium             | none            |
| hbca_c71  | P52        | bcm         | Reduction Mammoplasty Y  |     | african-american | 1       | pre       | 39.89 | obese       | medium             | none            |
| hbca_c72  | P53        | bcm         | Reduction Mammoplasty O  |     | african-american | 1       | pre       | 24.93 | normal      | medium             | none            |
| hbca_c73  | P53        | bcm         | Reduction Mammoplasty O  |     | african-american | 1       | pre       | 24.93 | normal      | medium             | none            |
| hbca_c74  | P54        | bcm         | Reduction Mammoplasty Y  |     | african-american | 1       | pre       | 35.92 | obese       | medium             | none            |
| hbca_c75  | P54        | bcm         | Reduction Mammoplasty Y  |     | african-american | 1       | pre       | 35.92 | obese       | medium             | none            |
| hbca_c76  | P55        | bcm         | Reduction Mammoplasty Y  |     | caucasian        | 0       | pre       | 28.13 | overweight  | medium             | none            |
| hbca_c77  | P55        | bcm         | Reduction Mammoplasty Y  |     | caucasian        | 0       | pre       | 28.13 | overweight  | medium             | none            |
| hbca_c78  | P56        | bcm         | Reduction Mammoplasty Y  |     | african-american | 0       | pre       | 34.00 | obese       | medium             | none            |
| hbca_c79  | P56        | bcm         | Reduction Mammoplasty Y  |     | african-american | 0       | pre       | 34.00 | obese       | medium             | none            |
| hbca_c80  | P57        | bcm         | Reduction Mammoplasty Y  |     | african-american | 1       | pre       | 43.95 | obese       | medium             | none            |
| hbca_c81  | P57        | bcm         | Reduction Mammoplasty Y  |     | african-american | 1       | pre       | 43.95 | obese       | medium             | none            |
| hbca_c82  | P38        | bcm         | Reduction Mammoplasty O  |     | caucasian        | 1       | post      | 27.64 | overweight  | medium             | none            |
| hbca_c83  | P38        | bcm         | Reduction Mammoplasty O  |     | caucasian        | 1       | post      | 27.64 | overweight  | medium             | none            |
| hbca_c84  | P39        | bcm         | Reduction Mammoplasty Y  |     | african-american | unknown | pre       | 30.79 | obese       | medium             | none            |
| hbca_c85  | P39        | bcm         | Reduction Mammoplasty Y  |     | african-american | unknown | pre       | 30.79 | obese       | medium             | none            |
| hbca_c86  | P40        | bcm         | Reduction Mammoplasty Y  |     | african-american | 0       | pre       | 38.09 | obese       | medium             | none            |
| hbca_c87  | P40        | bcm         | Reduction Mammoplasty Y  |     | african-american | 0       | pre       | 38.09 | obese       | medium             | none            |
| hbca_c88  | P58        | bcm         | Reduction Mammoplasty Y  |     | african-american | 0       | pre       | 35.19 | obese       | medium             | none            |
| hbca_c89  | P58        | bcm         | Reduction Mammoplasty Y  |     | african-american | 0       | pre       | 35.19 | obese       | medium             | none            |
| hbca_c90  | P41        | bcm         | Reduction Mammoplasty Y  |     | african-american | 1       | pre       | 34.41 | obese       | medium             | none            |
| hbca_c91  | P41        | bcm         | Reduction Mammoplasty Y  |     | african-american | 1       | pre       | 34.41 | obese       | medium             | none            |
| hbca_c92  | P59        | bcm         | Reduction Mammoplasty O  |     | hispanic         | unknown | post      | 31.50 | obese       | medium             | none            |
| hbca_c93  | P59        | bcm         | Reduction Mammoplasty O  |     | hispanic         | unknown | post      | 31.50 | obese       | medium             | none            |
| hbca_c94  | P60        | bcm         | Reduction Mammoplasty O  |     | hispanic         | unknown | unknown   | 39.00 | obese       | medium             | none            |
| hbca_c95  | P60        | bcm         | Reduction Mammoplasty O  |     | hispanic         | unknown | unknown   | 39.00 | obese       | medium             | none            |
| hbca_c96  | P61        | bcm         | Reduction Mammoplasty O  |     | african-american | unknown | unknown   | 42.16 | obese       | medium             | none            |
| hbca_c97  | P61        | bcm         | Reduction Mammoplasty O  |     | african-american | unknown | unknown   | 42.16 | obese       | medium             | none            |
| hbca_c98  | P62        | bcm         | Reduction Mammoplasty Y  |     | african-american | unknown | pre       | 38.04 | obese       | medium             | none            |
| hbca_c99  | P62        | bcm         | Reduction Mammoplasty Y  |     | african-american | unknown | pre       | 38.04 | obese       | medium             | none            |
| hbca_c100 | P59        | bcm         | Reduction Mammoplasty O  |     | hispanic         | unknown | post      | 31.50 | obese       | medium             | none            |
| hbca_c101 | P63        | bcm         | Reduction Mammoplasty Y  |     | african-american | 1       | pre       | 44.10 | obese       | medium             | none            |
| hbca_c102 | P63        | bcm         | Reduction Mammoplasty Y  |     | african-american | 1       | pre       | 44.10 | obese       | medium             | none            |
| hbca_c103 | P64        | bcm         | Reduction Mammoplasty Y  |     | african-american | 1       | pre       | 34.80 | obese       | medium             | none            |
| hbca_c104 | P64        | bcm         | Reduction Mammoplasty Y  |     | african-american | 1       | pre       | 34.80 | obese       | medium             | none            |
| hbca_c105 | P65        | bcm         | Reduction Mammoplasty Y  |     | african-american | 1       | pre       | 41.46 | obese       | medium             | none            |
| hbca_c106 | P65        | bcm         | Reduction Mammoplasty Y  |     | african-american | 1       | pre       | 41.46 | obese       | medium             | none            |
| hbca_c107 | P66        | bcm         | Reduction Mammoplasty Y  |     | african-american | 0       | pre       | 26.34 | overweight  | medium             | none            |
| hbca_c108 | P67        | bcm         | Reduction Mammoplasty Y  |     | caucasian        | 0       | pre       | 25.89 | overweight  | medium             | none            |
| hbca_c111 | P70        | bcm         | Reduction Mammoplasty O  |     | african-american | 1       | post      | 33.23 | obese       | medium             | none            |
| hbca_c109 | P68        | bcm         | Reduction Mammoplasty Y  |     | african-american | 1       | pre       | 39.20 | obese       | medium             | none            |
| hbca_c110 | P69        | bcm         | Reduction Mammoplasty Y  |     | african-american | 1       | pre       | 40.97 | obese       | medium             | none            |
| hbca_c112 | P71        | bcm         | prophylatic Mastectomy Y |     | caucasian        | 1       | unknown   | 37.01 | obese       | medium             | unknown         |
| hbca_c113 | P72        | bcm         | Reduction Mammoplasty Y  |     | caucasian        | 0       | pre       | 33.11 | obese       | medium             | none            |
| hbca_c114 | P73        | bcm         | Reduction Mammoplasty Y  |     | hispanic         | 1       | pre       | 34.88 | obese       | medium             | none            |
| hbca_c115 | P74        | bcm         | Reduction Mammoplasty O  |     | caucasian        | 0       | post      | 40.76 | obese       | medium             | none            |
| hbca_c116 | P75        | bcm         | prophylatic Mastectomy Y |     | asian            | 1       | pre       | 16.64 | underweight | medium             | unknown         |
| hbca_c117 | P76        | bcm         | prophylatic Mastectomy Y |     | caucasian        | 0       | pre       | 19.44 | normal      | medium             | unknown         |
| hbca_c118 | P77        | bcm         | Reduction Mammoplasty Y  |     | african-american | 1       | pre       | 35.94 | obese       | medium             | none            |
| hbca_c119 | P78        | bcm         | Reduction Mammoplasty Y  |     | african-american | 1       | pre       | 35.28 | obese       | medium             | none            |
| hbca_c120 | P79        | bcm         | prophylatic Mastectomy Y |     | hispanic         | 1       | pre       | 30.61 | obese       | medium             | unknown         |
| hbca_c121 | P80        | bcm         | Reduction Mammoplasty Y  |     | african-american | 0       | pre       | 33.52 | obese       | medium             | none            |
| hbca_c122 | P81        | bcm         | Reduction Mammoplasty Y  |     | caucasian        | 0       | pre       | 31.53 | obese       | medium             | none            |
| hbca_c123 | P82        | bcm         | Reduction Mammoplasty Y  |     | african-american | 1       | pre       | 45.46 | obese       | medium             | none            |
| hbca_c124 | P83        | bcm         | Reduction Mammoplasty Y  |     | african-american | 1       | pre       | 41.43 | obese       | medium             | none            |
| hbca_c125 | P84        | bcm         | Reduction Mammoplasty O  |     | caucasian        | 0       | post      | 26.48 | overweight  | medium             | none            |
| hbca_c126 | P85        | bcm         | Reduction Mammoplasty Y  |     | hispanic         | 1       | pre       | 30.90 | obese       | medium             | none            |
| hbca_c127 | P86        | bcm         | Reduction Mammoplasty Y  |     | african-american | 1       | pre       | 30.36 | obese       | medium             | none            |
| hbca_c128 | P87        | bcm         | Reduction Mammoplasty Y  |     | african-american | 1       | pre       | 46.95 | obese       | medium             | none            |
| hbca_c129 | P88        | bcm         | Reduction Mammoplasty Y  |     | african-american | 1       | pre       | 39.31 | obese       | medium             | none            |
| hbca_c130 | P89        | bcm         | Reduction Mammoplasty Y  |     | african-american | 1       | pre       | 43.24 | obese       | medium             | none            |
| hbca_c131 | P90        | bcm         | Reduction Mammoplasty Y  |     | african-american | 1       | pre       | 26.62 | overweight  | medium             | none            |
| hbca_c132 | P91        | bcm         | Reduction Mammoplasty Y  |     | african-american | 1       | pre       | 42.77 | obese       | medium             | none            |
| hbca_c133 | P92        | bcm         | Reduction Mammoplasty Y  |     | african-american | 1       | pre       | 39.39 | obese       | medium             | none            |
| hbca_c134 | P93        | bcm         | Reduction Mammoplasty Y  |     | african-american | 1       | pre       | 38.78 | obese       | medium             | none            |
| hbca_c135 | P94        | bcm         | Reduction Mammoplasty Y  |     | african-american | 1       | pre       | 32.28 | obese       | medium             | none            |
| hbca_c136 | P95        | bcm         | Reduction Mammoplasty Y  |     | african-american | 1       | pre       | 42.80 | obese       | medium             | none            |
| hbca_c137 | P96        | bcm         | Reduction Mammoplasty Y  |     | african-american | 0       | pre       | 47.44 | obese       | medium             | none            |
| hbca_c138 | P97        | bcm         | Reduction Mammoplasty Y  |     | hispanic         | 1       | pre       | 35.48 | obese       | medium             | none            |
| hbca_c139 | P98        | bcm         | Reduction Mammoplasty Y  |     | african-american | 1       | pre       | 35.63 | obese       | medium             | none            |
| hbca_c140 | P99        | bcm         | Reduction Mammoplasty Y  |     | african-american | 0       | pre       | 28.85 | overweight  | medium             | none            |
| hbca_c141 | P100       | bcm         | Reduction Mammoplasty Y  |     | caucasian        | 1       | pre       | 25.14 | overweight  | medium             | none            |

| Sample ID | Patient ID | Institution | Tissue Source          | Age | Ethnicity        | Parity  | Menopause | BMI   | BMI Group  | Digestion Protocol | Prior Treatment                                                                     |
|-----------|------------|-------------|------------------------|-----|------------------|---------|-----------|-------|------------|--------------------|-------------------------------------------------------------------------------------|
| hbca_c142 | P101       | bcm         | Reduction Mammoplasty  | Y   | african-american | 1       | pre       | 39.72 | obese      | medium             | none                                                                                |
| hbca_c143 | P102       | bcm         | Reduction Mammoplasty  | Y   | african-american | 1       | pre       | 32.97 | obese      | medium             | none                                                                                |
| hbca_c144 | P103       | bcm         | Reduction Mammoplasty  | Y   | african-american | 1       | pre       | 26.63 | overweight | medium             | none                                                                                |
| hbca_c145 | P104       | bcm         | Reduction Mammoplasty  | Y   | african-american | 1       | pre       | 36.95 | obese      | medium             | none                                                                                |
| hbca_c146 | P105       | bcm         | Reduction Mammoplasty  | Y   | african-american | 1       | pre       | 34.19 | obese      | medium             | none                                                                                |
| hbca_c147 | P106       | bcm         | Reduction Mammoplasty  | Y   | african-american | 1       | pre       | 27.66 | overweight | medium             | none                                                                                |
| hbca_c148 | P107       | bcm         | Reduction Mammoplasty  | Y   | african-american | 0       | pre       | 27.02 | overweight | medium             | none                                                                                |
| hbca_c149 | P108       | bcm         | Reduction Mammoplasty  | Y   | caucasian        | 0       | pre       | 27.13 | overweight | medium             | none                                                                                |
| hbca_c150 | P109       | bcm         | Reduction Mammoplasty  | O   | caucasian        | 0       | post      | 32.95 | obese      | medium             | none                                                                                |
| hbca_c151 | P110       | bcm         | Reduction Mammoplasty  | O   | caucasian        | 0       | post      | 26.73 | overweight | medium             | none                                                                                |
| hbca_c152 | P111       | bcm         | Reduction Mammoplasty  | Y   | african-american | 0       | pre       | 41.15 | obese      | medium             | none                                                                                |
| hbca_c153 | P112       | bcm         | Reduction Mammoplasty  | Y   | caucasian        | 1       | pre       | 34.00 | obese      | medium             | none                                                                                |
| hbca_c154 | P113       | uci         | Cancer Mastectomy      | Y   | caucasian        | 1       | unknown   | 23.72 | Normal     | medium             | (Perjeta/Xeloda/Kajinta)                                                            |
| hbca_c155 | P114       | uci         | Cancer Mastectomy      | Y   | caucasian        | 1       | pre       | 25.32 | overweight | medium             | hormonal therapy (aromatase)                                                        |
| hbca_c156 | P115       | uci         | Cancer Mastectomy      | O   | caucasian        | 1       | post      | 23.08 | Normal     | medium             | hormonal therapy (aromatase)                                                        |
| hbca_c157 | P116       | uci         | Cancer Mastectomy      | O   | caucasian        | 1       | post      | 35.21 | obese      | medium             | chemo                                                                               |
| hbca_c158 | P117       | uci         | Cancer Mastectomy      | Y   | hispanic         | 1       | pre       | 30.34 | obese      | medium             | none                                                                                |
| hbca_c159 | P118       | uci         | Prophylatic Mastectomy | O   | caucasian        | 1       | post      | 23.41 | Normal     | medium             | unknown                                                                             |
| hbca_c160 | P119       | uci         | Cancer Mastectomy      | Y   | caucasian        | 1       | pre       | 22.31 | Normal     | medium             | hormonal therapy (tamoxifen)                                                        |
| hbca_c161 | P120       | uci         | Cancer Mastectomy      | O   | hispanic         | 1       | post      | 30.14 | obese      | medium             | chemotherapy                                                                        |
| hbca_c162 | P121       | uci         | Prophylatic Mastectomy | Y   | caucasian        | unknown | unknown   | 29.28 | overweight | medium             | unknown<br>chemotherapy (docetaxel,<br>carboplatin, trastuzumab, and<br>pertuzumab) |
| hbca_c163 | P122       | uci         | Cancer Mastectomy      | Y   | caucasian        | 1       | pre       | 21.54 | normal     | medium             | hormonal therapy (tamoxifen)                                                        |
| hbca_c164 | P123       | uci         | prophylatic Mastectomy | Y   | caucasian        | 1       | pre       | 18.17 | normal     | medium             | hormonal therapy (tamoxifen)                                                        |
| hbca_c165 | P124       | uci         | Cancer Mastectomy      | O   | caucasian        | 0       | pre       | 25.40 | overweight | medium             | none                                                                                |
| hbca_c166 | P125       | uci         | prophylatic Mastectomy | Y   | caucasian        | 1       | unknown   | 33.72 | obese      | medium             | none                                                                                |
| hbca_c167 | P126       | uci         | prophylatic Mastectomy | O   | caucasian        | 1       | pre       | 23.76 | normal     | medium             | unknown                                                                             |

### Supplementary Table 1 – Breast Atlas Tissue Samples and Clinical Metadata

This table lists the n =167 tissue samples and clinical metadata for the 126 women included in the breast atlas project. The columns list from left to right the sample identifier (Sample ID), the patient identifier (Patient ID), the institution where the tissue sample was collected from MD Anderson (MDA), UC Irvine (UCI) or Baylor College of Medicine (BCM), the procedure from which the tissue source was collected reduction mammoplasties (RM=111), prophylactic mastectomies (PM=18), and contralateral mastectomies (CM=38), the age of the women as < 50 (Y), >= 50 (O), the ethnicity the women self-identifies as, the parity status as positive (1), negative (0) or unknown, the menopause status (pre/post), the Body Mass Index (BMI), the BMI Group classification and digestion protocol time use during sample dissociation (short, medium, or long) and whether the woman received any prior treatment before the tissue was collected.



Supplementary Table 2 – Single Cell RNA-seq Quality Control Metrics

| Sample ID | Number of Cells | Mean Reads per Cell | Median Genes per Cell | Number of Reads | Fraction Reads in Cells | Genes Detected | Median UMI Counts per Cell |
|-----------|-----------------|---------------------|-----------------------|-----------------|-------------------------|----------------|----------------------------|
| hbca_c01  | 4,091           | 79,318              | 353                   | 324,492,736     | 75.1%                   | 20,828         | 1,981                      |
| hbca_c02  | 9,577           | 36,403              | 923                   | 348,639,606     | 72.3%                   | 23,775         | 2,336                      |
| hbca_c03  | 5,450           | 65,569              | 1,032                 | 357,352,385     | 70.6%                   | 22,024         | 2,564                      |
| hbca_c04  | 8,924           | 39,111              | 800                   | 349,034,669     | 69.8%                   | 23,140         | 1,705                      |
| hbca_c05  | 5,786           | 57,183              | 709                   | 330,866,587     | 70.1%                   | 22,209         | 1,604                      |
| hbca_c06  | 3,593           | 89,184              | 1,178                 | 320,441,257     | 83.5%                   | 22,069         | 2,948                      |
| hbca_c07  | 5,250           | 60,928              | 953                   | 319,872,861     | 76.8%                   | 22,364         | 2,250                      |
| hbca_c08  | 2,533           | 137,485             | 1,055                 | 348,249,946     | 69.5%                   | 20,626         | 2,570                      |
| hbca_c09  | 7,894           | 42,387              | 823                   | 334,609,974     | 71.8%                   | 23,308         | 1,922                      |
| hbca_c10  | 5,682           | 63,430              | 771                   | 360,412,188     | 87.9%                   | 21,623         | 1,645                      |
| hbca_c11  | 4,052           | 84,470              | 787                   | 342,274,452     | 76.6%                   | 21,264         | 1,729                      |
| hbca_c12  | 2,322           | 141,601             | 872                   | 328,799,276     | 55.0%                   | 20,459         | 2,177                      |
| hbca_c13  | 4,127           | 83,670              | 1,099                 | 345,309,344     | 86.8%                   | 21,564         | 2,690                      |
| hbca_c14  | 9,969           | 41,530              | 2,106                 | 414,015,762     | 95.6%                   | 22,850         | 8,247                      |
| hbca_c15  | 9,921           | 42,668              | 1,955                 | 423,315,895     | 96.1%                   | 22,609         | 7,829                      |
| hbca_c16  | 10,603          | 38,889              | 1,197                 | 412,348,361     | 95.0%                   | 22,866         | 4,501                      |
| hbca_c17  | 10,362          | 40,884              | 1,234                 | 423,649,081     | 94.4%                   | 22,849         | 4,428                      |
| hbca_c18  | 5,955           | 56,256              | 2,024                 | 335,010,009     | 97.4%                   | 21,296         | 7,468                      |
| hbca_c19  | 7,580           | 48,118              | 1,812                 | 364,736,800     | 95.6%                   | 22,342         | 7,183                      |
| hbca_c20  | 11,999          | 39,924              | 2,573                 | 479,054,503     | 97.0%                   | 23,811         | 10,611                     |
| hbca_c21  | 10,537          | 33,038              | 1,645                 | 348,128,564     | 96.2%                   | 23,356         | 6,257                      |
| hbca_c22  | 8,554           | 40,097              | 1,476                 | 342,994,984     | 95.8%                   | 22,282         | 5,158                      |
| hbca_c23  | 10,030          | 36,670              | 1,427                 | 367,801,885     | 95.8%                   | 22,526         | 4,877                      |
| hbca_c24  | 2,345           | 148,555             | 770                   | 348,361,547     | 65.7%                   | 24,166         | 1,162                      |
| hbca_c25  | 6,401           | 59,231              | 2,582                 | 379,140,265     | 84.7%                   | 24,813         | 7,353                      |
| hbca_c26  | 7,845           | 50,538              | 2,020                 | 396,476,992     | 90.1%                   | 25,280         | 6,664                      |
| hbca_c27  | 5,944           | 59,127              | 1,755                 | 351,455,269     | 78.1%                   | 23,853         | 5,445                      |
| hbca_c28  | 2,526           | 154,806             | 1,449                 | 391,041,072     | 70.4%                   | 22,713         | 4,255                      |
| hbca_c29  | 6,425           | 59,692              | 1,509                 | 383,526,635     | 74.7%                   | 24,811         | 4,744                      |
| hbca_c30  | 12,399          | 30,024              | 1,654                 | 372,270,308     | 78.7%                   | 25,997         | 4,849                      |
| hbca_c31  | 7,134           | 44,541              | 2,003                 | 317,759,854     | 85.3%                   | 24,105         | 6,488                      |
| hbca_c32  | 11,034          | 32,093              | 1,506                 | 354,120,495     | 81.5%                   | 25,021         | 4,758                      |
| hbca_c33  | 6,839           | 58,653              | 2,054                 | 401,131,543     | 88.3%                   | 24,780         | 7,035                      |
| hbca_c34  | 8,930           | 55,014              | 1,918                 | 491,282,666     | 87.3%                   | 25,091         | 6,060                      |
| hbca_c35  | 5,694           | 76,943              | 1,203                 | 438,114,228     | 55.1%                   | 23,846         | 3,606                      |
| hbca_c36  | 7,582           | 58,284              | 2,382                 | 441,911,150     | 92.1%                   | 23,845         | 7,912                      |
| hbca_c37  | 10,318          | 44,250              | 1,460                 | 456,573,803     | 85.5%                   | 25,256         | 5,031                      |
| hbca_c38  | 8,639           | 43,128              | 2,012                 | 372,584,898     | 88.2%                   | 24,854         | 5,860                      |
| hbca_c39  | 5,917           | 66,216              | 2,055                 | 391,801,107     | 85.9%                   | 24,007         | 7,619                      |
| hbca_c41  | 8,420           | 47,239              | 1,529                 | 397,758,089     | 85.6%                   | 25,743         | 4,501                      |
| hbca_c42  | 6,864           | 56,666              | 2,001                 | 388,956,766     | 86.0%                   | 25,564         | 5,956                      |
| hbca_c43  | 10,061          | 39,595              | 2,277                 | 398,365,868     | 90.4%                   | 25,700         | 7,654                      |
| hbca_c44  | 12,386          | 37,439              | 1,850                 | 463,722,721     | 87.8%                   | 25,490         | 6,745                      |
| hbca_c45  | 16,520          | 25,592              | 1,183                 | 422,790,667     | 74.8%                   | 25,474         | 2,830                      |
| hbca_c40  | 4,570           | 90,273              | 1,377                 | 412,548,145     | 78.4%                   | 23,685         | 3,944                      |
| hbca_c82  | 7,533           | 42,551              | 1,564                 | 320,540,361     | 77.1%                   | 24,934         | 4,602                      |
| hbca_c83  | 9,969           | 36,167              | 1,336                 | 360,555,401     | 75.7%                   | 25,155         | 3,819                      |
| hbca_c84  | 12,466          | 38,226              | 1,372                 | 476,527,092     | 72.8%                   | 25,280         | 3,941                      |
| hbca_c85  | 11,774          | 41,479              | 1,700                 | 488,380,226     | 78.7%                   | 25,568         | 5,555                      |
| hbca_c86  | 11,983          | 30,404              | 1,467                 | 364,335,501     | 78.7%                   | 25,618         | 4,308                      |
| hbca_c87  | 10,890          | 36,260              | 1,478                 | 394,879,939     | 81.8%                   | 25,572         | 4,509                      |
| hbca_c90  | 9,161           | 44,766              | 1,635                 | 410,105,314     | 87.9%                   | 24,367         | 4,604                      |
| hbca_c91  | 9,469           | 28,450              | 1,403                 | 269,397,441     | 87.6%                   | 24,043         | 3,557                      |
| hbca_c46  | 11,913          | 34,346              | 1,207                 | 409,172,629     | 71.5%                   | 25,136         | 2,945                      |
| hbca_c47  | 9,126           | 39,254              | 1,125                 | 358,234,249     | 70.8%                   | 24,276         | 2,895                      |
| hbca_c48  | 8,627           | 46,106              | 1,391                 | 397,758,601     | 87.0%                   | 25,214         | 4,322                      |
| hbca_c49  | 8,126           | 58,187              | 2,040                 | 472,831,839     | 89.7%                   | 24,266         | 6,953                      |
| hbca_c50  | 5,018           | 87,632              | 1,703                 | 439,739,114     | 89.7%                   | 26,109         | 5,064                      |
| hbca_c51  | 6,129           | 76,466              | 2,255                 | 468,665,048     | 90.6%                   | 25,517         | 7,893                      |
| hbca_c52  | 5,805           | 82,968              | 808                   | 481,631,031     | 59.3%                   | 23,909         | 2,252                      |
| hbca_c53  | 10,090          | 44,704              | 1,337                 | 451,065,448     | 86.7%                   | 25,902         | 3,777                      |
| hbca_c54  | 8,900           | 53,864              | 1,946                 | 479,396,431     | 87.5%                   | 26,149         | 5,733                      |
| hbca_c55  | 11,025          | 33,129              | 1,976                 | 365,251,856     | 88.4%                   | 25,648         | 6,164                      |
| hbca_c56  | 13,292          | 27,174              | 1,745                 | 361,197,190     | 86.4%                   | 25,562         | 5,157                      |

| Sample ID | Number of Cells | Mean Reads per Cell | Median Genes per Cell | Number of Reads | Fraction Reads in Cells | Genes Detected | Median UMI Counts per Cell |
|-----------|-----------------|---------------------|-----------------------|-----------------|-------------------------|----------------|----------------------------|
| hbca_c57  | 12,807          | 28,873              | 1,244                 | 369,783,072     | 82.1%                   | 25,986         | 3,855                      |
| hbca_c58  | 12,035          | 37,459              | 1,444                 | 450,819,388     | 85.1%                   | 25,941         | 4,758                      |
| hbca_c59  | 9,448           | 42,433              | 1,160                 | 400,915,804     | 71.4%                   | 24,937         | 3,589                      |
| hbca_c60  | 18,664          | 21,815              | 1,582                 | 407,158,167     | 87.6%                   | 26,701         | 4,431                      |
| hbca_c61  | 12,740          | 29,815              | 1,730                 | 379,843,424     | 87.2%                   | 26,172         | 5,275                      |
| hbca_c62  | 11,795          | 29,324              | 1,706                 | 345,879,461     | 85.1%                   | 25,732         | 4,892                      |
| hbca_c63  | 11,648          | 32,884              | 1,715                 | 383,040,911     | 84.0%                   | 25,098         | 5,211                      |
| hbca_c64  | 10,615          | 46,004              | 2,228                 | 488,341,054     | 84.7%                   | 25,395         | 7,493                      |
| hbca_c65  | 13,521          | 31,221              | 1,864                 | 422,151,595     | 82.8%                   | 25,085         | 6,331                      |
| hbca_c66  | 10,884          | 44,418              | 1,747                 | 483,454,528     | 83.7%                   | 25,936         | 5,098                      |
| hbca_c67  | 13,547          | 31,444              | 1,608                 | 425,972,057     | 81.8%                   | 25,651         | 4,667                      |
| hbca_c68  | 10,582          | 42,935              | 1,566                 | 454,341,839     | 78.7%                   | 26,038         | 4,470                      |
| hbca_c69  | 15,150          | 31,424              | 1,619                 | 476,074,866     | 81.4%                   | 25,869         | 4,586                      |
| hbca_c70  | 9,916           | 39,706              | 2,072                 | 393,728,950     | 87.3%                   | 25,873         | 6,800                      |
| hbca_c71  | 11,964          | 32,298              | 1,887                 | 386,422,651     | 86.1%                   | 25,966         | 5,908                      |
| hbca_c72  | 11,502          | 32,651              | 1,974                 | 375,557,112     | 83.2%                   | 26,308         | 5,548                      |
| hbca_c73  | 11,647          | 32,187              | 2,044                 | 374,889,239     | 85.4%                   | 26,033         | 6,289                      |
| hbca_c74  | 13,610          | 29,180              | 1,643                 | 397,144,206     | 85.5%                   | 25,747         | 4,829                      |
| hbca_c75  | 16,502          | 21,757              | 1,373                 | 359,038,086     | 83.9%                   | 25,739         | 3,648                      |
| hbca_c76  | 11,679          | 36,674              | 2,152                 | 428,317,510     | 85.7%                   | 26,425         | 6,040                      |
| hbca_c77  | 11,403          | 36,082              | 2,210                 | 411,454,267     | 87.8%                   | 26,681         | 6,083                      |
| hbca_c78  | 12,214          | 28,491              | 1,775                 | 347,997,546     | 80.3%                   | 25,107         | 5,101                      |
| hbca_c79  | 12,305          | 29,823              | 1,654                 | 366,983,410     | 76.0%                   | 25,296         | 4,695                      |
| hbca_c80  | 13,289          | 28,285              | 1,563                 | 375,892,640     | 81.7%                   | 25,546         | 4,511                      |
| hbca_c81  | 13,122          | 28,146              | 1,645                 | 369,333,714     | 83.4%                   | 25,945         | 4,718                      |
| hbca_c88  | 7,041           | 58,303              | 1,985                 | 410,512,392     | 86.4%                   | 24,851         | 6,021                      |
| hbca_c89  | 6,718           | 57,121              | 2,108                 | 383,742,211     | 87.9%                   | 24,654         | 6,480                      |
| hbca_c100 | 8,927           | 50,041              | 2,485                 | 446,716,152     | 84.2%                   | 25,675         | 8,324                      |
| hbca_c92  | 8,476           | 51,364              | 2,060                 | 435,365,199     | 84.0%                   | 26,145         | 6,471                      |
| hbca_c93  | 6,618           | 62,898              | 2,086                 | 416,264,504     | 84.3%                   | 25,696         | 6,561                      |
| hbca_c94  | 8,431           | 44,139              | 2,135                 | 372,138,533     | 84.1%                   | 24,879         | 6,451                      |
| hbca_c95  | 8,086           | 42,646              | 1,720                 | 344,840,516     | 76.8%                   | 24,895         | 5,008                      |
| hbca_c96  | 10,184          | 27,403              | 1,499                 | 279,075,635     | 84.6%                   | 24,581         | 4,325                      |
| hbca_c97  | 8,411           | 38,493              | 1,855                 | 323,768,135     | 86.0%                   | 25,019         | 5,764                      |
| hbca_c98  | 7,145           | 55,077              | 2,082                 | 393,531,047     | 86.3%                   | 25,265         | 6,755                      |
| hbca_c99  | 7,950           | 50,287              | 2,220                 | 399,788,791     | 87.6%                   | 25,471         | 7,480                      |
| hbca_c101 | 11,847          | 28,648              | 1,702                 | 339,399,886     | 82.1%                   | 25,507         | 4,848                      |
| hbca_c102 | 7,981           | 46,193              | 1,896                 | 368,671,215     | 87.4%                   | 25,386         | 5,979                      |
| hbca_c103 | 6,575           | 59,460              | 1,883                 | 390,955,869     | 82.8%                   | 24,818         | 6,455                      |
| hbca_c104 | 8,231           | 44,503              | 1,689                 | 366,310,737     | 82.7%                   | 24,799         | 5,523                      |
| hbca_c105 | 9,672           | 39,087              | 1,754                 | 378,051,031     | 80.2%                   | 25,719         | 5,232                      |
| hbca_c106 | 6,905           | 50,595              | 1,799                 | 349,364,118     | 79.5%                   | 25,122         | 5,266                      |
| hbca_c107 | 16,373          | 23,899              | 1,404                 | 391,303,086     | 82.8%                   | 25,054         | 4,313                      |
| hbca_c108 | 7,522           | 50,855              | 1,284                 | 382,532,558     | 84.7%                   | 23,666         | 3,532                      |
| hbca_c109 | 10,893          | 35,130              | 1,501                 | 382,674,799     | 78.2%                   | 25,276         | 4,143                      |
| hbca_c110 | 9,996           | 36,836              | 1,973                 | 368,221,340     | 80.4%                   | 26,131         | 5,686                      |
| hbca_c111 | 13,195          | 31,551              | 1,667                 | 416,327,108     | 86.3%                   | 25,852         | 4,971                      |
| hbca_c112 | 9,200           | 43,586              | 1,357                 | 400,991,623     | 79.0%                   | 24,709         | 4,364                      |
| hbca_c113 | 12,361          | 32,006              | 1,454                 | 395,636,808     | 81.1%                   | 25,480         | 4,022                      |
| hbca_c114 | 6,942           | 57,555              | 1,637                 | 399,549,786     | 76.0%                   | 24,498         | 4,711                      |
| hbca_c115 | 10,538          | 37,439              | 1,978                 | 394,541,850     | 89.9%                   | 25,304         | 6,054                      |
| hbca_c116 | 10,804          | 42,673              | 1,278                 | 461,041,111     | 72.8%                   | 24,826         | 3,624                      |
| hbca_c117 | 14,842          | 32,039              | 1,747                 | 475,529,139     | 85.7%                   | 26,165         | 5,293                      |
| hbca_c118 | 13,505          | 33,511              | 1,341                 | 452,569,153     | 82.0%                   | 25,891         | 3,657                      |
| hbca_c119 | 14,000          | 21,599              | 1,311                 | 302,388,805     | 78.8%                   | 25,801         | 3,507                      |
| hbca_c120 | 14,895          | 24,107              | 1,633                 | 359,083,871     | 82.6%                   | 25,638         | 4,496                      |
| hbca_c121 | 14,372          | 24,150              | 1,654                 | 347,090,147     | 81.4%                   | 26,049         | 4,335                      |
| hbca_c122 | 9,182           | 45,153              | 2,061                 | 414,603,688     | 86.4%                   | 26,155         | 6,163                      |
| hbca_c123 | 7,915           | 52,654              | 1,459                 | 416,758,293     | 81.5%                   | 25,024         | 4,669                      |
| hbca_c124 | 11,118          | 30,853              | 1,418                 | 343,027,485     | 84.0%                   | 25,252         | 3,980                      |



| Sample ID | Number of Cells | Mean Reads per Cell | Median Genes per Cell | Number of Reads | Fraction Reads in Cells | Genes Detected | Median UMI Counts per Cell |
|-----------|-----------------|---------------------|-----------------------|-----------------|-------------------------|----------------|----------------------------|
| hbca_c125 | 11,846          | 29,921              | 1,630                 | 354,452,553     | 80.0%                   | 25,290         | 4,845                      |
| hbca_c126 | 13,775          | 28,931              | 1,529                 | 398,533,174     | 84.5%                   | 25,967         | 4,386                      |
| hbca_c127 | 15,262          | 23,761              | 1,479                 | 362,643,192     | 89.3%                   | 25,860         | 4,269                      |
| hbca_c128 | 11,606          | 29,845              | 1,236                 | 346,390,571     | 84.4%                   | 24,230         | 2,776                      |
| hbca_c129 | 13,665          | 25,641              | 1,398                 | 350,385,998     | 83.7%                   | 25,781         | 3,754                      |
| hbca_c130 | 12,946          | 27,950              | 1,616                 | 361,852,867     | 84.2%                   | 26,059         | 4,459                      |
| hbca_c131 | 10,004          | 39,896              | 1,461                 | 399,123,293     | 77.7%                   | 25,154         | 4,185                      |
| hbca_c132 | 11,895          | 18,060              | 1,726                 | 214,835,483     | 84.9%                   | 24,574         | 4,741                      |
| hbca_c133 | 11,820          | 23,403              | 1,565                 | 276,623,881     | 81.1%                   | 25,851         | 4,179                      |
| hbca_c134 | 11,735          | 36,751              | 1,690                 | 431,277,850     | 75.7%                   | 26,152         | 4,780                      |
| hbca_c135 | 3,025           | 135,406             | 1,986                 | 409,604,334     | 86.7%                   | 24,779         | 6,867                      |
| hbca_c136 | 15,721          | 25,999              | 1,832                 | 408,737,174     | 86.3%                   | 26,111         | 5,724                      |
| hbca_c137 | 15,523          | 26,608              | 1,544                 | 413,049,215     | 87.3%                   | 26,070         | 4,342                      |
| hbca_c138 | 13,432          | 33,324              | 2,074                 | 447,616,500     | 85.2%                   | 26,380         | 5,930                      |
| hbca_c139 | 13,461          | 28,347              | 1,406                 | 381,590,819     | 82.9%                   | 26,185         | 3,909                      |
| hbca_c140 | 13,719          | 28,310              | 1,440                 | 388,386,621     | 79.4%                   | 25,702         | 4,386                      |
| hbca_c141 | 8,643           | 50,086              | 1,804                 | 432,898,337     | 76.3%                   | 25,749         | 5,456                      |
| hbca_c142 | 14,040          | 32,229              | 1,819                 | 452,499,084     | 84.0%                   | 26,384         | 5,369                      |
| hbca_c143 | 11,377          | 36,111              | 1,886                 | 410,842,800     | 79.9%                   | 25,902         | 6,072                      |
| hbca_c144 | 14,623          | 28,942              | 1,368                 | 423,224,604     | 80.8%                   | 26,247         | 3,911                      |
| hbca_c145 | 7,779           | 51,558              | 1,924                 | 401,069,920     | 83.7%                   | 26,191         | 5,740                      |
| hbca_c146 | 10,420          | 41,819              | 2,246                 | 435,762,558     | 87.6%                   | 26,590         | 7,428                      |
| hbca_c147 | 16,396          | 27,843              | 1,823                 | 456,518,118     | 86.1%                   | 26,602         | 5,523                      |
| hbca_c148 | 12,133          | 35,379              | 1,981                 | 429,254,174     | 84.1%                   | 26,238         | 5,549                      |
| hbca_c149 | 15,047          | 28,209              | 1,653                 | 424,470,724     | 86.6%                   | 25,315         | 4,938                      |
| hbca_c150 | 11,377          | 33,789              | 1,917                 | 384,419,538     | 85.7%                   | 26,167         | 5,802                      |
| hbca_c151 | 11,573          | 35,975              | 1,930                 | 416,343,438     | 84.7%                   | 25,467         | 6,096                      |
| hbca_c152 | 10,921          | 37,854              | 1,979                 | 413,405,270     | 81.3%                   | 25,501         | 6,532                      |
| hbca_c153 | 13,262          | 33,068              | 1,834                 | 438,549,472     | 82.0%                   | 26,101         | 5,593                      |
| hbca_c154 | 9,473           | 46,895              | 1,672                 | 444,236,569     | 91.4%                   | 25,798         | 5,613                      |
| hbca_c155 | 13,146          | 45,395              | 1,522                 | 596,766,041     | 86.9%                   | 26,009         | 4,901                      |
| hbca_c156 | 11,052          | 56,779              | 1,591                 | 627,526,390     | 87.4%                   | 26,396         | 4,740                      |
| hbca_c157 | 7,219           | 46,745              | 2,441                 | 337,456,663     | 87.8%                   | 25,875         | 8,255                      |
| hbca_c158 | 9,460           | 44,674              | 1,754                 | 422,618,255     | 78.6%                   | 25,371         | 5,368                      |
| hbca_c159 | 7,262           | 63,461              | 2,021                 | 460,857,056     | 90.7%                   | 25,728         | 6,736                      |
| hbca_c160 | 7,091           | 56,563              | 1,789                 | 401,089,051     | 90.1%                   | 25,372         | 5,509                      |
| hbca_c161 | 7,291           | 45,513              | 2,108                 | 331,836,547     | 91.7%                   | 24,847         | 6,949                      |
| hbca_c162 | 9,054           | 57,130              | 1,980                 | 517,263,400     | 91.5%                   | 26,008         | 6,515                      |
| hbca_c163 | 10,161          | 41,428              | 1,496                 | 420,957,053     | 92.6%                   | 25,836         | 4,356                      |
| hbca_c164 | 9,297           | 53,506              | 1,774                 | 497,447,029     | 91.0%                   | 25,713         | 5,818                      |
| hbca_c165 | 7,339           | 99,427              | 1,723                 | 729,696,394     | 73.2%                   | 25,658         | 6,325                      |
| hbca_c166 | 9,116           | 38,452              | 1,871                 | 350,528,531     | 90.7%                   | 25,478         | 5,551                      |
| hbca_c167 | 8,053           | 48,291              | 2,392                 | 388,888,979     | 79.0%                   | 25,689         | 7,740                      |

### Supplementary Table 2 – Single Cell RNA-seq Quality Control Metrics

This table lists the quality control metrics for the fresh breast tissue samples sequenced with single cell RNA sequencing using the 10X Genomics Chromium Platform before any filtering was applied. The columns listed from left to right indicate the Sample ID, Number of Cells, Mean Reads per Cell, Median Genes per Cell, Number of Reads, Fraction Reads in Cells, Total Genes Detected, Median UMI Counts per Cell.

**Supplementary Table 3 – Top Marker Genes Expressed in Major Breast Cell Types**

| Cell Type     | Gene     | Average LogFC | pct1  | pct2    | Cell Type       | Gene    | Average LogFC | pct1  | pct2  |
|---------------|----------|---------------|-------|---------|-----------------|---------|---------------|-------|-------|
| <b>Basal</b>  | KRT14    | 3.614         | 0.946 | 0.144   | <b>Vascular</b> | SELE    | 2.617         | 0.405 | 0.022 |
|               | KRT17    | 3.491         | 0.977 | 0.191   |                 | ACKR1   | 2.537         | 0.511 | 0.021 |
|               | DST      | 2.752         | 0.966 | 0.455   |                 | FABP4   | 2.406         | 0.674 | 0.142 |
|               | KRT5     | 2.407         | 0.929 | 0.076   |                 | STC1    | 2.125         | 0.519 | 0.058 |
|               | SAA1     | 2.306         | 0.796 | 0.184   |                 | CLDN5   | 2.125         | 0.746 | 0.035 |
|               | ACTA2    | 2.204         | 0.902 | 0.164   |                 | ANGPT2  | 2.077         | 0.729 | 0.082 |
|               | SFN      | 2.043         | 0.871 | 0.150   |                 | CSF3    | 2.016         | 0.402 | 0.041 |
|               | MYLK     | 2.033         | 0.832 | 0.118   |                 | IFI27   | 1.987         | 0.921 | 0.293 |
|               | TAGLN    | 1.999         | 0.958 | 0.301   |                 | ADGRL4  | 1.872         | 0.820 | 0.013 |
|               | ACTG2    | 1.891         | 0.665 | 0.031   |                 | ADAMTS9 | 1.866         | 0.741 | 0.082 |
|               | MT1X     | 1.790         | 0.898 | 0.466   |                 | AQP1    | 1.861         | 0.588 | 0.062 |
|               | TPM2     | 1.723         | 0.968 | 0.360   |                 | C2CD4B  | 1.807         | 0.534 | 0.037 |
|               | C2orf40  | 1.640         | 0.717 | 0.070   |                 | GNG11   | 1.751         | 0.876 | 0.197 |
|               | CNN1     | 1.631         | 0.735 | 0.076   |                 | TM4SF1  | 1.750         | 0.968 | 0.520 |
|               | FBXO32   | 1.477         | 0.679 | 0.148   |                 | SPARCL1 | 1.750         | 0.917 | 0.471 |
|               | OXTR     | 1.455         | 0.527 | 0.014   |                 | CD93    | 1.713         | 0.773 | 0.040 |
|               | TPM1     | 1.443         | 0.944 | 0.492   |                 | VWF     | 1.702         | 0.654 | 0.018 |
|               | CRYAB    | 1.406         | 0.837 | 0.253   |                 | RBP7    | 1.702         | 0.564 | 0.068 |
| MT2A          | 1.382    | 0.986         | 0.820 | PECAM1  | 1.700           | 0.766   | 0.037         |       |       |
| MT1E          | 1.303    | 0.778         | 0.387 | SPRY1   | 1.668           | 0.736   | 0.192         |       |       |
| <b>LumHR</b>  | AREG     | 3.142         | 0.860 | 0.291   | RGS5            | 2.573   | 0.567         | 0.018 |       |
|               | MUCL1    | 3.075         | 0.425 | 0.151   | C11orf96        | 2.414   | 0.914         | 0.321 |       |
|               | AZGP1    | 2.887         | 0.983 | 0.220   | MT1A            | 2.199   | 0.779         | 0.264 |       |
|               | PIP      | 2.679         | 0.411 | 0.086   | IGFBP5          | 1.942   | 0.700         | 0.218 |       |
|               | KRT18    | 2.440         | 0.989 | 0.274   | STEAP4          | 1.895   | 0.485         | 0.074 |       |
|               | AGR2     | 2.111         | 0.728 | 0.036   | MYL9            | 1.696   | 0.738         | 0.351 |       |
|               | ANKRD30A | 2.069         | 0.810 | 0.023   | IGFBP7          | 1.639   | 0.974         | 0.463 |       |
|               | TFF1     | 1.998         | 0.386 | 0.030   | ADIRF           | 1.623   | 0.848         | 0.498 |       |
|               | S100A14  | 1.987         | 0.931 | 0.145   | ADAMTS4         | 1.584   | 0.591         | 0.205 |       |
|               | KRT19    | 1.954         | 0.915 | 0.206   | TAGLN           | 1.481   | 0.808         | 0.362 |       |
|               | KRT8     | 1.952         | 0.978 | 0.299   | PDK4            | 1.475   | 0.542         | 0.217 |       |
|               | TCIM     | 1.844         | 0.808 | 0.133   | NDUFA4L2        | 1.472   | 0.446         | 0.015 |       |
|               | AGR3     | 1.607         | 0.619 | 0.019   | GADD45B         | 1.442   | 0.774         | 0.601 |       |
|               | CD24     | 1.596         | 0.931 | 0.211   | RGS16           | 1.416   | 0.502         | 0.178 |       |
|               | STC2     | 1.571         | 0.739 | 0.078   | ADAMTS1         | 1.392   | 0.745         | 0.304 |       |
|               | SYTL2    | 1.544         | 0.784 | 0.079   | MYH11           | 1.391   | 0.388         | 0.094 |       |
|               | TFF3     | 1.540         | 0.540 | 0.052   | NR2F2           | 1.389   | 0.657         | 0.227 |       |
|               | SPINT2   | 1.453         | 0.977 | 0.280   | CCL2            | 1.385   | 0.641         | 0.394 |       |
| MGP           | 1.425    | 0.967         | 0.774 | NOTCH3  | 1.367           | 0.550   | 0.073         |       |       |
| PTHLH         | 1.368    | 0.380         | 0.052 | MCAM    | 1.341           | 0.592   | 0.121         |       |       |
| <b>LumSec</b> | SCGB2A2  | 2.624         | 0.523 | 0.132   | IGKC            | 5.936   | 0.835         | 0.385 |       |
|               | SLPI     | 2.260         | 0.835 | 0.090   | IGLC2           | 5.501   | 0.509         | 0.139 |       |
|               | WFDC2    | 2.180         | 0.672 | 0.210   | IGHA1           | 5.324   | 0.663         | 0.255 |       |
|               | LTF      | 2.168         | 0.675 | 0.068   | IGLC3           | 5.116   | 0.397         | 0.086 |       |
|               | KRT15    | 2.159         | 0.806 | 0.097   | JCHAIN          | 5.060   | 0.568         | 0.088 |       |
|               | MMP7     | 2.042         | 0.600 | 0.067   | IGHA2           | 4.555   | 0.446         | 0.085 |       |
|               | SCGB3A1  | 1.908         | 0.442 | 0.120   | IGHG1           | 3.879   | 0.219         | 0.013 |       |
|               | PI3      | 1.895         | 0.285 | 0.019   | IGHM            | 3.711   | 0.408         | 0.026 |       |
|               | FDCSP    | 1.853         | 0.116 | 0.030   | IGHG3           | 2.953   | 0.207         | 0.008 |       |
|               | KRT23    | 1.826         | 0.671 | 0.063   | IGLL5           | 2.864   | 0.148         | 0.002 |       |
|               | CLDN4    | 1.811         | 0.890 | 0.217   | IGHG2           | 2.837   | 0.125         | 0.005 |       |
|               | S100A9   | 1.758         | 0.494 | 0.054   | IGHG4           | 2.168   | 0.120         | 0.004 |       |
|               | KRT7     | 1.738         | 0.953 | 0.324   | MZB1            | 2.104   | 0.519         | 0.015 |       |
|               | CCL28    | 1.680         | 0.793 | 0.046   | IGHD            | 1.994   | 0.192         | 0.002 |       |
|               | TACSTD2  | 1.587         | 0.938 | 0.370   | SSR4            | 1.894   | 0.755         | 0.677 |       |
|               | KRT19    | 1.558         | 0.868 | 0.224   | CD79A           | 1.835   | 0.782         | 0.004 |       |
|               | ALDH1A3  | 1.558         | 0.755 | 0.107   | CD37            | 1.654   | 0.556         | 0.086 |       |
|               | PIGR     | 1.523         | 0.645 | 0.034   | DERL3           | 1.431   | 0.475         | 0.007 |       |
| CD24          | 1.511    | 0.930         | 0.224 | HLA-DRA | 1.406           | 0.540   | 0.226         |       |       |
| CLDN3         | 1.482    | 0.697         | 0.089 | HERPUD1 | 1.372           | 0.850   | 0.575         |       |       |

| Cell Type   | Gene    | Average LogFC | pct1  | pct2   | Cell Type | Gene     | Average LogFC | pct1  | pct2  |
|-------------|---------|---------------|-------|--------|-----------|----------|---------------|-------|-------|
| Fibroblasts | DCN     | 3.847         | 0.991 | 0.251  | T cells   | IL7R     | 3.143         | 0.780 | 0.023 |
|             | APOD    | 3.458         | 0.962 | 0.289  |           | CCL5     | 2.796         | 0.659 | 0.014 |
|             | CFD     | 3.454         | 0.789 | 0.236  |           | PTPRC    | 2.674         | 0.940 | 0.051 |
|             | TNFAIP6 | 2.918         | 0.823 | 0.085  |           | CXCR4    | 2.559         | 0.913 | 0.098 |
|             | LUM     | 2.886         | 0.939 | 0.077  |           | GNLY     | 2.408         | 0.180 | 0.007 |
|             | COL1A2  | 2.622         | 0.839 | 0.095  |           | CD2      | 1.995         | 0.700 | 0.003 |
|             | COL1A1  | 2.481         | 0.693 | 0.083  |           | SRGN     | 1.985         | 0.961 | 0.279 |
|             | COL3A1  | 2.481         | 0.613 | 0.074  |           | NKG7     | 1.970         | 0.323 | 0.005 |
|             | MMP3    | 2.427         | 0.203 | 0.044  |           | KLRB1    | 1.890         | 0.442 | 0.002 |
|             | GSN     | 2.287         | 0.966 | 0.539  |           | ARHGDI1  | 1.816         | 0.829 | 0.204 |
|             | FBLN1   | 2.166         | 0.855 | 0.064  |           | CD3D     | 1.803         | 0.671 | 0.003 |
|             | CCDC80  | 2.151         | 0.820 | 0.114  |           | CREM     | 1.787         | 0.744 | 0.322 |
|             | MEG3    | 2.107         | 0.861 | 0.111  |           | TRBC2    | 1.785         | 0.593 | 0.006 |
|             | SFRP2   | 2.107         | 0.698 | 0.037  |           | LEPROTL1 | 1.736         | 0.712 | 0.143 |
|             | COL6A2  | 1.980         | 0.943 | 0.217  |           | CD7      | 1.731         | 0.570 | 0.014 |
|             | IGFBP6  | 1.899         | 0.684 | 0.094  |           | SARAF    | 1.724         | 0.905 | 0.594 |
|             | IGF1    | 1.896         | 0.669 | 0.040  |           | CD52     | 1.688         | 0.594 | 0.024 |
| C1S         | 1.894   | 0.895         | 0.098 | SYTL3  | 1.680     | 0.591    | 0.020         |       |       |
| COL6A3      | 1.872   | 0.847         | 0.056 | CNOT6L | 1.680     | 0.710    | 0.161         |       |       |
| C1R         | 1.868   | 0.871         | 0.152 | CST7   | 1.669     | 0.505    | 0.011         |       |       |
| Lymphatic   | CCL21   | 4.375         | 0.909 | 0.016  | HLA-DRA   | 3.553    | 0.933         | 0.200 |       |
|             | TFF3    | 2.945         | 0.893 | 0.093  | IL1B      | 3.125    | 0.524         | 0.020 |       |
|             | MMRN1   | 2.928         | 0.910 | 0.010  | HLA-DPA1  | 3.112    | 0.870         | 0.149 |       |
|             | CAVIN2  | 2.259         | 0.758 | 0.094  | HLA-DPB1  | 3.014    | 0.855         | 0.212 |       |
|             | CLDN5   | 2.109         | 0.874 | 0.108  | HLA-DRB1  | 2.935    | 0.894         | 0.195 |       |
|             | LYVE1   | 2.108         | 0.689 | 0.019  | CD74      | 2.828    | 0.941         | 0.331 |       |
|             | TFPI    | 2.027         | 0.971 | 0.404  | CCL3      | 2.733    | 0.461         | 0.033 |       |
|             | PPFIBP1 | 1.915         | 0.893 | 0.278  | HLA-DQA1  | 2.686    | 0.743         | 0.052 |       |
|             | GNG11   | 1.879         | 0.904 | 0.269  | C1QB      | 2.611    | 0.710         | 0.012 |       |
|             | ECSCR   | 1.774         | 0.759 | 0.075  | C1QA      | 2.570    | 0.724         | 0.013 |       |
|             | ANGPT2  | 1.717         | 0.647 | 0.151  | RNASE1    | 2.539    | 0.466         | 0.077 |       |
|             | PROX1   | 1.679         | 0.636 | 0.039  | FCER1G    | 2.528    | 0.921         | 0.024 |       |
|             | CD9     | 1.667         | 0.933 | 0.506  | TYROBP    | 2.528    | 0.943         | 0.021 |       |
|             | FABP4   | 1.656         | 0.804 | 0.197  | LYZ       | 2.527    | 0.696         | 0.011 |       |
|             | FABP5   | 1.635         | 0.809 | 0.229  | CCL4      | 2.425    | 0.431         | 0.051 |       |
|             | AKAP12  | 1.503         | 0.838 | 0.319  | HLA-DQB1  | 2.374    | 0.769         | 0.102 |       |
|             | RAMP2   | 1.440         | 0.668 | 0.152  | GPR183    | 2.232    | 0.808         | 0.070 |       |
| CAV1        | 1.425   | 0.914         | 0.460 | CTSB   | 2.205     | 0.874    | 0.338         |       |       |
| EFEMP1      | 1.412   | 0.695         | 0.227 | CD163  | 2.203     | 0.646    | 0.009         |       |       |
| S100A10     | 1.316   | 0.984         | 0.796 | C1QC   | 2.197     | 0.682    | 0.006         |       |       |

### Supplementary Table 3 – Top Marker Genes Expressed in Major Breast Cell Types

This table lists the top 20 marker genes expressed in the scRNA-seq data for each major cell type cluster based on average log fold-change and specificity of the gene expressed in the indicated cell type (pct1) compared to the other cell types (pct2). The columns listed (from left to right) indicate the name of the major cell type, the gene names, the average log-fold change (Average LogFC), the pct1 value indicating the fraction of cells within the cluster expressing the gene, the pct2 value indicating the fraction of cells in other clusters expressing the gene.

Supplementary Table 4 – Top Marker Genes Expressed in Major Breast Nuclei Cell Types

| Nuclei Type | Gene       | Average LogFC | pct1  | pct2      | Nuclei Type | Gene   | Average LogFC | pct1  | pct2  |
|-------------|------------|---------------|-------|-----------|-------------|--------|---------------|-------|-------|
| Basal       | AC044810.3 | 2.572         | 0.723 | 0.031     | Vascular    | MECOM  | 2.854         | 0.773 | 0.035 |
|             | CARMN      | 2.289         | 0.705 | 0.083     |             | BTNL9  | 2.744         | 0.547 | 0.018 |
|             | LINC01060  | 2.283         | 0.64  | 0.054     |             | MCTP1  | 2.610         | 0.759 | 0.105 |
|             | ACTA2      | 2.274         | 0.699 | 0.094     |             | PTPRB  | 2.343         | 0.685 | 0.031 |
|             | KLHL29     | 2.156         | 0.733 | 0.139     |             | VWF    | 2.206         | 0.669 | 0.058 |
|             | DST        | 1.993         | 0.919 | 0.515     |             | ADGRL4 | 2.160         | 0.571 | 0.009 |
|             | IL1RAPL2   | 1.842         | 0.336 | 0.054     |             | LDB2   | 2.125         | 0.833 | 0.155 |
|             | NRG1       | 1.837         | 0.452 | 0.06      |             | ANO2   | 2.084         | 0.589 | 0.034 |
|             | SEMA3C     | 1.830         | 0.688 | 0.177     |             | EPAS1  | 2.063         | 0.689 | 0.127 |
|             | PTPRT      | 1.801         | 0.64  | 0.113     |             | CD36   | 2.010         | 0.694 | 0.221 |
|             | SAMD5      | 1.777         | 0.546 | 0.064     |             | ABLIM3 | 2.007         | 0.538 | 0.072 |
|             | FBXO32     | 1.772         | 0.563 | 0.123     |             | ENPP2  | 1.974         | 0.42  | 0.049 |
|             | TP63       | 1.766         | 0.475 | 0.035     |             | PTPRM  | 1.956         | 0.879 | 0.348 |
|             | GRIA4      | 1.739         | 0.48  | 0.063     |             | EMCN   | 1.955         | 0.562 | 0.041 |
|             | MYLK       | 1.737         | 0.547 | 0.078     |             | PECAM1 | 1.924         | 0.605 | 0.052 |
|             | RBBP8      | 1.728         | 0.543 | 0.105     |             | FLT1   | 1.885         | 0.466 | 0.013 |
| FHOD3       | 1.712      | 0.483         | 0.055 | PREX2     | 1.854       | 0.61   | 0.078         |       |       |
| TMEFF2      | 1.696      | 0.395         | 0.036 | SPARCL1   | 1.827       | 0.756  | 0.199         |       |       |
| KLHL13      | 1.674      | 0.523         | 0.101 | ZNF385D   | 1.776       | 0.55   | 0.165         |       |       |
| CACNA1C     | 1.673      | 0.662         | 0.144 | PLCB4     | 1.765       | 0.627  | 0.161         |       |       |
| LumHR       | ANKRD30A   | 3.788         | 0.862 | 0.191     | RGS6        | 2.247  | 0.531         | 0.081 |       |
|             | AFF3       | 2.949         | 0.991 | 0.243     | KCNAB1      | 2.191  | 0.504         | 0.11  |       |
|             | ERBB4      | 2.948         | 0.983 | 0.207     | COL25A1     | 2.154  | 0.375         | 0.042 |       |
|             | TTC6       | 2.412         | 0.855 | 0.03      | ADGRL3      | 2.021  | 0.404         | 0.065 |       |
|             | MYBPC1     | 2.173         | 0.43  | 0.036     | PRKG1       | 1.915  | 0.83          | 0.327 |       |
|             | NEK10      | 2.140         | 0.624 | 0.057     | NR2F2-AS1   | 1.740  | 0.576         | 0.13  |       |
|             | THSD4      | 2.081         | 0.948 | 0.248     | AC012409.2  | 1.717  | 0.455         | 0.105 |       |
|             | ESR1       | 2.062         | 0.675 | 0.167     | IGFBP7      | 1.711  | 0.602         | 0.128 |       |
|             | INPP4B     | 1.991         | 0.881 | 0.122     | ITGA8       | 1.656  | 0.191         | 0.022 |       |
|             | PRLR       | 1.864         | 0.803 | 0.091     | TEX41       | 1.646  | 0.317         | 0.023 |       |
|             | LINC01194  | 1.811         | 0.112 | 0.017     | EBF2        | 1.584  | 0.411         | 0.054 |       |
|             | XBP1       | 1.755         | 0.851 | 0.185     | GUCY1A2     | 1.563  | 0.293         | 0.03  |       |
|             | AC093001.1 | 1.714         | 0.331 | 0.016     | PDE3A       | 1.513  | 0.375         | 0.055 |       |
|             | SERHL2     | 1.687         | 0.338 | 0.085     | RCAN2       | 1.475  | 0.406         | 0.105 |       |
|             | DIO2       | 1.658         | 0.257 | 0.07      | FHL5        | 1.457  | 0.254         | 0.001 |       |
|             | ALCAM      | 1.651         | 0.73  | 0.129     | DLC1        | 1.401  | 0.706         | 0.306 |       |
| PI15        | 1.611      | 0.282         | 0.034 | RYR2      | 1.391       | 0.33   | 0.073         |       |       |
| ST8SIA6     | 1.597      | 0.627         | 0.03  | STEAP4    | 1.385       | 0.255  | 0.023         |       |       |
| CADPS2      | 1.593      | 0.736         | 0.221 | PDGFRB    | 1.376       | 0.358  | 0.045         |       |       |
| EFHD1       | 1.584      | 0.708         | 0.089 | CHSY3     | 1.373       | 0.315  | 0.094         |       |       |
| LumSec      | AC011247.1 | 2.246         | 0.724 | 0.079     | PDE3B       | 3.073  | 0.927         | 0.072 |       |
|             | COBL       | 2.024         | 0.773 | 0.129     | ACACB       | 2.750  | 0.966         | 0.201 |       |
|             | GABRP      | 1.922         | 0.606 | 0.032     | WDPCP       | 2.255  | 0.884         | 0.379 |       |
|             | ELF5       | 1.919         | 0.619 | 0.023     | PCDH9       | 2.158  | 0.776         | 0.068 |       |
|             | CCL28      | 1.869         | 0.654 | 0.063     | CLSTN2      | 2.156  | 0.739         | 0.086 |       |
|             | KRT15      | 1.804         | 0.619 | 0.152     | ADIPOQ      | 1.921  | 0.687         | 0.022 |       |
|             | KIT        | 1.773         | 0.626 | 0.038     | TRHDE       | 1.851  | 0.616         | 0.021 |       |
|             | BARX2      | 1.729         | 0.501 | 0.048     | SOX5        | 1.845  | 0.948         | 0.267 |       |
|             | EHF        | 1.703         | 0.582 | 0.095     | GPAM        | 1.837  | 0.652         | 0.039 |       |
|             | LINC01152  | 1.697         | 0.581 | 0.072     | AQP7        | 1.836  | 0.783         | 0.038 |       |
|             | HS3ST4     | 1.627         | 0.499 | 0.068     | KCNIP2-AS1  | 1.828  | 0.589         | 0.02  |       |
|             | NEBL       | 1.514         | 0.797 | 0.244     | LINC02237   | 1.798  | 0.693         | 0.016 |       |
|             | SLC12A2    | 1.479         | 0.538 | 0.135     | CPM         | 1.793  | 0.885         | 0.137 |       |
|             | TFCP2L1    | 1.444         | 0.388 | 0.049     | PLIN1       | 1.776  | 0.743         | 0.042 |       |
|             | SORBS2     | 1.439         | 0.798 | 0.26      | SLC19A3     | 1.772  | 0.706         | 0.01  |       |
|             | SHANK2     | 1.433         | 0.704 | 0.2       | CAV2        | 1.755  | 0.721         | 0.099 |       |
| PDE4B       | 1.395      | 0.664         | 0.173 | GHR       | 1.661       | 0.897  | 0.258         |       |       |
| AC078923.1  | 1.389      | 0.288         | 0.019 | DIRC3     | 1.659       | 0.663  | 0.062         |       |       |
| DTNB        | 1.365      | 0.725         | 0.217 | LINC02456 | 1.657       | 0.613  | 0.059         |       |       |
| CX3CL1      | 1.357      | 0.358         | 0.042 | MARC1     | 1.640       | 0.662  | 0.031         |       |       |

| Nuclei Type | Gene       | Average LogFC | pct1  | pct2  | Nuclei Type | Gene       | Average LogFC | pct1  | pct2  |
|-------------|------------|---------------|-------|-------|-------------|------------|---------------|-------|-------|
| Fibroblasts | LAMA2      | 2.896         | 0.857 | 0.132 | T cells     | SKAP1      | 2.577         | 0.765 | 0.077 |
|             | DCLK1      | 2.655         | 0.832 | 0.101 |             | ARHGAP15   | 2.442         | 0.779 | 0.098 |
|             | NEGR1      | 2.501         | 0.681 | 0.079 |             | PTPRC      | 2.384         | 0.744 | 0.056 |
|             | LINC02511  | 2.265         | 0.558 | 0.031 |             | THEMIS     | 2.373         | 0.509 | 0.013 |
|             | ANK2       | 2.242         | 0.69  | 0.113 |             | IKZF1      | 2.370         | 0.662 | 0.033 |
|             | KAZN       | 2.226         | 0.857 | 0.324 |             | PARP8      | 2.273         | 0.678 | 0.146 |
|             | SLIT2      | 2.043         | 0.552 | 0.053 |             | CD247      | 2.230         | 0.497 | 0.015 |
|             | COL6A3     | 2.028         | 0.609 | 0.047 |             | STAT4      | 2.080         | 0.507 | 0.022 |
|             | BICC1      | 2.026         | 0.731 | 0.142 |             | ACO22075.1 | 2.073         | 0.392 | 0.028 |
|             | NOVA1      | 1.967         | 0.744 | 0.172 |             | CD96       | 2.071         | 0.521 | 0.038 |
|             | COL5A2     | 1.925         | 0.676 | 0.112 |             | ITK        | 2.067         | 0.45  | 0.006 |
|             | DLC1       | 1.924         | 0.848 | 0.217 |             | IL7R       | 2.041         | 0.366 | 0.006 |
|             | HPSE2      | 1.906         | 0.327 | 0.049 |             | ANKRD44    | 2.031         | 0.772 | 0.191 |
|             | ABCA9      | 1.891         | 0.608 | 0.074 |             | AOAH       | 1.995         | 0.503 | 0.055 |
|             | ABCA9-AS1  | 1.878         | 0.472 | 0.057 |             | CAMK4      | 1.961         | 0.407 | 0.012 |
|             | DCN        | 1.868         | 0.646 | 0.134 |             | SYTL3      | 1.947         | 0.545 | 0.081 |
|             | SLIT3      | 1.839         | 0.663 | 0.146 |             | AC010609.1 | 1.934         | 0.369 | 0.005 |
|             | ABCA10     | 1.818         | 0.591 | 0.128 |             | BCL11B     | 1.919         | 0.422 | 0.01  |
|             | ABCA6      | 1.800         | 0.692 | 0.116 |             | CARD11     | 1.905         | 0.433 | 0.019 |
|             | ROBO2      | 1.793         | 0.377 | 0.081 |             | LINC01934  | 1.863         | 0.367 | 0.017 |
| Lymphatic   | AL357507.1 | 3.310         | 0.766 | 0.07  | Myeloid     | F13A1      | 2.999         | 0.564 | 0.032 |
|             | PKHD1L1    | 3.210         | 0.875 | 0.014 |             | MRC1       | 2.817         | 0.596 | 0.049 |
|             | KLHL4      | 2.498         | 0.629 | 0.023 |             | RBPJ       | 2.589         | 0.714 | 0.254 |
|             | LINC02147  | 2.453         | 0.647 | 0.018 |             | TBXAS1     | 2.360         | 0.676 | 0.041 |
|             | RHOJ       | 2.447         | 0.767 | 0.069 |             | FRMD4B     | 2.208         | 0.747 | 0.176 |
|             | ST6GALNAC3 | 2.358         | 0.84  | 0.108 |             | CD163      | 2.153         | 0.521 | 0.01  |
|             | MMRN1      | 2.345         | 0.623 | 0.011 |             | RAB31      | 2.148         | 0.655 | 0.09  |
|             | GPM6A      | 2.316         | 0.602 | 0.022 |             | SLC8A1     | 2.133         | 0.594 | 0.071 |
|             | STOX2      | 2.255         | 0.807 | 0.129 |             | MS4A6A     | 2.120         | 0.54  | 0.011 |
|             | AKAP12     | 2.202         | 0.688 | 0.113 |             | MERTK      | 1.934         | 0.547 | 0.062 |
|             | NRG3       | 2.191         | 0.604 | 0.054 |             | SLCO2B1    | 1.918         | 0.495 | 0.028 |
|             | PDE1A      | 2.134         | 0.597 | 0.054 |             | LGMN       | 1.904         | 0.433 | 0.055 |
|             | PPFIBP1    | 2.094         | 0.884 | 0.292 |             | COLEC12    | 1.895         | 0.457 | 0.094 |
|             | RELN       | 2.093         | 0.527 | 0.038 |             | FMN1       | 1.883         | 0.631 | 0.158 |
|             | KALRN      | 2.013         | 0.832 | 0.233 |             | SLC1A3     | 1.859         | 0.498 | 0.074 |
|             | HECW2      | 1.938         | 0.607 | 0.065 |             | PDK4       | 1.831         | 0.641 | 0.275 |
|             | ZDHHC14    | 1.906         | 0.714 | 0.134 |             | HDAC9      | 1.826         | 0.591 | 0.111 |
|             | CNKS3      | 1.870         | 0.66  | 0.137 |             | SLC9A9     | 1.822         | 0.61  | 0.153 |
|             | STK32B     | 1.866         | 0.571 | 0.074 |             | P2RY14     | 1.816         | 0.362 | 0.021 |
|             | AL356277.3 | 1.841         | 0.36  | 0.023 |             | LYVE1      | 1.803         | 0.357 | 0.022 |
| Mast        | NTM        | 3.209         | 0.938 | 0.144 |             |            |               |       |       |
|             | IL18R1     | 3.027         | 0.808 | 0.017 |             |            |               |       |       |
|             | SYTL3      | 2.989         | 0.932 | 0.101 |             |            |               |       |       |
|             | SLC24A3    | 2.613         | 0.894 | 0.175 |             |            |               |       |       |
|             | HPGD       | 2.474         | 0.742 | 0.053 |             |            |               |       |       |
|             | TPSB2      | 2.467         | 0.408 | 0.002 |             |            |               |       |       |
|             | HDC        | 2.452         | 0.683 | 0.005 |             |            |               |       |       |
|             | KIAA1549   | 2.442         | 0.745 | 0.065 |             |            |               |       |       |
|             | RAB27B     | 2.424         | 0.724 | 0.09  |             |            |               |       |       |
|             | TNFAIP3    | 2.416         | 0.54  | 0.06  |             |            |               |       |       |
|             | SLC18A2    | 2.318         | 0.65  | 0.039 |             |            |               |       |       |
|             | CPA3       | 2.281         | 0.556 | 0.002 |             |            |               |       |       |
|             | TNIIK      | 2.271         | 0.867 | 0.182 |             |            |               |       |       |
|             | CPM        | 2.262         | 0.893 | 0.194 |             |            |               |       |       |
|             | CD69       | 2.254         | 0.538 | 0.02  |             |            |               |       |       |
|             | SRGN       | 2.231         | 0.755 | 0.085 |             |            |               |       |       |
|             | SLC8A3     | 2.143         | 0.56  | 0.003 |             |            |               |       |       |
|             | GPAT3      | 2.128         | 0.489 | 0.024 |             |            |               |       |       |
|             | RHOH       | 2.093         | 0.683 | 0.092 |             |            |               |       |       |
|             | RGS13      | 2.071         | 0.558 | 0.006 |             |            |               |       |       |

#### Supplementary Table 4 – Top Marker Genes Expressed in Major Breast Cell Types in Nuclei data

This table lists the top 20 marker genes expressed in the snRNA-seq data for each major cell type cluster based on average log fold-change and specificity of the gene expressed in the indicated cell type (pct1) compared to the other cell types (pct2). The columns listed (from left to right) indicate the name of the major cell type, the gene names, the average log-fold change (Average LogFC), the pct1 value indicating the fraction of cells within the cluster expressing the gene, the pct2 value indicating the fraction of cells in other clusters expressing the gene.

| Patient ID | Number of spots under tissue | Number of reads | Median UMI per spot | Median Genes per spot | Total genes detected | Reads mapped to exonic regions | Reads mapped to intergenic regions | Reads mapped to intronic regions | Reads mapped to transcriptome |
|------------|------------------------------|-----------------|---------------------|-----------------------|----------------------|--------------------------------|------------------------------------|----------------------------------|-------------------------------|
| P10        | 2741                         | 461115960       | 3031                | 1546                  | 23050                | 0.836                          | 0.022                              | 0.032                            | 0.816                         |
| P35        | 1896                         | 478182981       | 2223                | 1184                  | 22295                | 0.878                          | 0.019                              | 0.026                            | 0.855                         |
| P46        | 3129                         | 404340693       | 2348                | 1315                  | 22442                | 0.823                          | 0.026                              | 0.052                            | 0.803                         |
| P47        | 3449                         | 362966308       | 1108                | 797                   | 22121                | 0.837                          | 0.027                              | 0.06                             | 0.817                         |
| P65        | 3226                         | 404107425       | 2284                | 1035                  | 23915                | 0.896                          | 0.02                               | 0.027                            | 0.875                         |
| P67        | 3655                         | 452452634       | 2666                | 1343                  | 23688                | 0.899                          | 0.018                              | 0.026                            | 0.879                         |
| P79        | 3571                         | 438705200       | 2379                | 1279                  | 24489                | 0.816                          | 0.027                              | 0.047                            | 0.798                         |
| P82        | 3631                         | 376273215       | 1512                | 841                   | 23688                | 0.82                           | 0.03                               | 0.05                             | 0.801                         |
| P85        | 3669                         | 404861379       | 3570                | 1545                  | 24788                | 0.845                          | 0.027                              | 0.038                            | 0.826                         |
| P127       | 2854                         | 423500797       | 2000                | 1024                  | 23038                | 0.75                           | 0.04                               | 0.064                            | 0.732                         |

### Supplementary Table 5 – Quality Control Metrics for Spatial Transcriptomics Data

This table lists the quality control metrics for breast tissue samples sequenced with the Spatial Transcriptomics platform (Visium, 10X Genomics). The columns listed (from left to right) indicate the Patient ID, Number of spots under tissue, Number of reads, Median UMI per spot, Median Genes per spot, Total genes detected, Reads mapping rate (exonic, intergenic, intronic regions and transcriptome).



| Cell Type   | Gene     | Cell Annotation (module score) |
|-------------|----------|--------------------------------|
| Basal       | KRT5     | 1                              |
|             | ACTG2    | 1                              |
|             | TUBB2B   | 0                              |
|             | COL17A1  | 1                              |
|             | KRT6B    | 0                              |
| LAMA3       | 1        |                                |
| AR          | 1        |                                |
| ESR1        | 1        |                                |
| PGR         | 1        |                                |
| AREG        | 1        |                                |
| OXTR        | 0        |                                |
| LumHR       | ANKRD30A | 1                              |
|             | AGR3     | 1                              |
|             | AGR2     | 1                              |
|             | TMC5     | 1                              |
|             | DNAJC12  | 1                              |
|             | RASEF    | 1                              |
|             | SLPI     | 1                              |
| LTF         | 1        |                                |
| LumSec      | KRT15    | 1                              |
|             | MMP7     | 1                              |
|             | CCL28    | 1                              |
|             | ALDH1A3  | 1                              |
|             | PIGR     | 1                              |
| LUM         | 1        |                                |
| TNFAIP6     | 0        |                                |
| COL1A2      | 1        |                                |
| Fibroblasts | COL1A1   | 1                              |
|             | FBLN1    | 1                              |
|             | MMP2     | 1                              |
|             | SERPINF1 | 1                              |
|             | MCAM     | 0                              |
| RGS5        | 1        |                                |
| GJA4        | 1        |                                |
| Pericytes   | NDUFA4L2 | 1                              |
|             | SSTR2    | 1                              |
|             | AVPR1A   | 0                              |
|             | PLN      | 1                              |
|             | EDNRA    | 1                              |
| CCL21       | 1        |                                |
| MMRN1       | 0        |                                |
| PROX1       | 1        |                                |
| Lymphatic   | SCN3B    | 1                              |
|             | PKHD1L1  | 0                              |
|             | TBX1     | 1                              |
|             | PGM5     | 1                              |
| VWF         | 0        |                                |
| SELE        | 0        |                                |
| ACKR1       | 1        |                                |
| Vascular    | CSF3     | 0                              |
|             | ADGRL4   | 0                              |
|             | RBP7     | 1                              |
|             | PGF      | 1                              |
|             | AQP1     | 1                              |

| Cell Type     | Gene     | Cell Annotation (module score) |
|---------------|----------|--------------------------------|
| Myeloid       | CD14     | 1                              |
|               | CD68     | 1                              |
|               | C1QA     | 1                              |
|               | C1QB     | 1                              |
|               | FCER1G   | 0                              |
|               | C1QC     | 1                              |
|               | LYZ      | 1                              |
|               | CD163    | 1                              |
| MSR1          | 1        |                                |
| IL18R1        | 0        |                                |
| HPGD          | 0        |                                |
| HDC           | 0        |                                |
| Mast          | SLC18A2  | 0                              |
|               | CPA3     | 0                              |
|               | CD69     | 0                              |
|               | HPGDS    | 0                              |
| CD3D          | 0        |                                |
| CD3E          | 0        |                                |
| CD4           | 1        |                                |
| CD8A          | 1        |                                |
| T cells       | IL7R     | 1                              |
|               | CCL5     | 1                              |
|               | NKG7     | 1                              |
|               | GZMB     | 1                              |
|               | CD2      | 1                              |
|               | CD27     | 0                              |
|               | DERL3    | 0                              |
| B cells       | JCHAIN   | 1                              |
|               | IGHM     | 1                              |
|               | TNFRSF17 | 0                              |
|               | MZB1     | 1                              |
|               | CD79A    | 0                              |
| PLIN1         | 0        |                                |
| ADIPOQ        | 0        |                                |
| Adipocytes    | PLIN4    | 0                              |
|               | GPD1     | 0                              |
|               | LPL      | 0                              |
| LIPE          | 0        |                                |
| Epithelial    | EPCAM    | 0                              |
| Endothelial   | PECAM1   | 0                              |
| Proliferation | MKI67    | 0                              |
| Immune        | PTPRC    | 0                              |
| Immune        | TRAC     | 0                              |
| Mis           | TP63     | 0                              |
| Luminal       | KRT19    | 0                              |
| B cells       | IGHA2    | Did not work                   |

### Supplementary Table 6 – Custom Targeted Gene Panel for smFISH (Resolve)

This table lists the top expressed genes selected for each breast cell type from the scRNA-seq data to generate a custom 100-gene panel for smFISH analysis (Resolve Biosciences). The entire panel of 100 genes was used to profile each of the breast tissue samples, to determine the spatial distribution of the breast cell types in the tissue sections. The table shows the cell type, the genes used for classification and cell annotation module score with values of 1 (Yes) or 0 (No).

| Section ID | Patient ID | Total Counts<br>(raw) | Total Counts<br>(post filter) | Total Cells<br>(raw) | Filtered Cells<br>(post filter) |
|------------|------------|-----------------------|-------------------------------|----------------------|---------------------------------|
| P46-S1     | P46        | 1491813               | 1301494                       | 11929                | 9879                            |
| P35-S1     | P35        | 913325                | 702059                        | 7604                 | 6683                            |
| P47-S1     | P47        | 667314                | 615735                        | 6872                 | 6050                            |
| P69-S1     | P69        | 491862                | 330047                        | 4276                 | 3390                            |
| P69-S2     | P69        | 580993                | 157526                        | 4754                 | 4018                            |
| P46-S2     | P46        | 460881                | 319725                        | 5847                 | 3961                            |
| P128-S1    | P128       | 113031                | 75978                         | 1244                 | 868                             |
| P69-S3     | P69        | 1549406               | 853581                        | 5441                 | 4591                            |
| P46-S3     | P46        | 1991213               | 1018173                       | 11788                | 8989                            |
| P46-S4     | P46        | 703202                | 343803                        | 3635                 | 2906                            |
| P128-S2    | P128       | 208133                | 95192                         | 1290                 | 928                             |
| P128-S3    | P128       | 1019583               | 545389                        | 4597                 | 3372                            |

### Supplementary Table 7 – Quality Control Metrics for smFISH Data

The table lists the quality control metrics for the 12 breast tissue samples profiled with the custom 100-gene panel for smFISH analysis (Resolve Biosciences). The columns listed (from left to right) indicate the Section ID, Patient ID, the number of transcripts captured under tissue, the number of transcripts after filtering, the number of cells detected and the number of cells after filtering.

| <b>Sample</b> | <b>Patient ID</b> | <b>Cells profiled</b> |
|---------------|-------------------|-----------------------|
| P129_s1       | P129              | 78219                 |
| P130_s1       | P130              | 62302                 |
| P131_s1       | P131              | 40781                 |
| P132_s1       | P132              | 49985                 |
| P123_s1       | P123              | 21585                 |
| P125_s1       | P125              | 5557                  |
| P119_s1       | P119              | 18144                 |
| P114_s1       | P114              | 10468                 |

**Supplementary Table 8 - Breast Tissue Samples for CODEX**

This table lists the 8 breast tissue samples that were used for CODEX analysis, along with the clinical metadata for each woman, and total number of cells that were profiled and analyzed. Columns from left to right are Sample Section, Patient ID, number of cells profiled.

Supplementary Table 9 – CODEX 34-Antibody Panel Design

| Cycle # | Antibody   | Clone     |       | Reporter   | Ratio | Ab vendor | Ab Catalog number                   |
|---------|------------|-----------|-------|------------|-------|-----------|-------------------------------------|
| Cycle1  | blank      |           |       |            |       |           |                                     |
|         | blank      |           |       |            |       |           |                                     |
|         | blank      |           |       |            |       |           |                                     |
| Cycle2  | Keratin19  | A53-B/A2  | BX025 | RX025-A750 | 1:50  | Biologend | 628502                              |
|         | CD8        | C8/144B   | BX026 | BX026-ATTO | 1:200 | Akoya     | 4250012                             |
|         | PCNA       | PC10      | BX020 | RX020-Cy5  | 1:50  | Biologend | 307902                              |
| Cycle3  | Vimentin   | RV202     | BX034 | RX034-A750 | 1:50  | BD        | 550513                              |
|         | CD31       | EP3095    | BX001 | RX001-ATTO | 1:200 | Akoya     | (custom, ab226157 from abcam)       |
|         | CD3e       | EP449E    | BX045 | RX045-Cy5  | 1:150 | Akoya     | (custom, ab271850 from abcam)       |
| Cycle4  | Keratin7   | W16155A   | BX019 | RX019-A750 | 1:50  | Biologend | 601602                              |
|         | Ki67       | B56       | BX047 | RX047-ATTO | 1:200 | Akoya     | 4250019                             |
|         | CD4        | EPR6855   | BX003 | RX003-Cy5  | 1:200 | Akoya     | (custom, ab181724 from abcam)       |
| Cycle5  | CD227      | HMPV      | BX004 | BX004-A750 | 1:50  | BD        | 555925                              |
|         | Perlecan   | 5D7-2E4   | BX017 | RX017-ATTO | 1:50  | BD        | 565781                              |
|         | CD45       | 2D1       | BX021 | RX021-Cy5  | 1:100 | Akoya     | from Novus                          |
| Cycle6  | Keratin17  | W16131A   | BX022 | RX022-A750 | 1:50  | Biologend | W16131A                             |
|         | Podoplanin | NC-08     | BX023 | BX023-ATTO | 1:200 | Akoya     | 4250004                             |
|         | CD68       | KP1       | BX015 | RX015-Cy5  | 1:200 | Akoya     | (custom; MA5-13324 frm ThermoFisher |
| Cycle7  | Empty      |           |       |            |       |           |                                     |
|         | CD14       | EPR3653   | BX037 | RX037-ATTO | 1:50  | Abcam     | ab226121                            |
|         | CollagenIV | EPR20966  | BX042 | RX042-Cy5  | 1:50  | Abcam     | ab226485                            |
| Cycle8  | Keratin18  | DA-7      | BX049 | RX049-A750 | 1:50  | Biologend | 628402                              |
|         | HLA-DPB1   | EPR11226  | BX035 | RX035-ATTO | 1:50  | Abcam     | ab157210                            |
|         | CD11c      | 118/A5    | BX024 | RX024-Cy5  | 1:200 | Akoya     | Biological NBP2-                    |
| Cycle9  | Empty      |           |       |            |       |           |                                     |
|         | E-Cadherin | 4A2C7     | BX014 | RX014-ATTO | 1:200 | Akoya     | 4250021                             |
|         | PR         | KMC912    | BX007 | RX007-Cy5  | 1:50  | ThermoFis | 14-9764-82                          |
| Cycle10 | Keratin8   | 1E8       | BX040 | RX040-A750 | 1:50  | Biologend | 697902                              |
|         | Keratin14  | Poly19053 | BX032 | BX032-ATTO | 1:300 | Akoya     | (custom; 905304 from Biologend)     |
|         | TP63       | W15093A   | BX033 | RX033-Cy5  | 1:50  | Biologend | W15093A                             |
| Cycle11 | Empty      |           |       |            |       |           |                                     |
|         | Empty      |           |       |            |       |           |                                     |
|         | SMA        | 1A4       | BX030 | RX030-Cy5  | 1:50  | Abcam     | ab7817                              |
| Cycle12 | Empty      |           |       |            |       |           |                                     |
|         | Empty      |           |       |            |       |           |                                     |
|         | Runx3      | R3-5G4    | BX036 | RX036-Cy5  | 1:50  | Biologend | R3-5G4                              |

| Cycle # | Antibody  | Clone     |       | Reporter  | Ratio | Ab vendor | Ab Catalog number               |
|---------|-----------|-----------|-------|-----------|-------|-----------|---------------------------------|
| Cycle13 | Empty     |           |       |           |       |           |                                 |
|         | Empty     |           |       |           |       |           |                                 |
|         | CD66e     | BSB-13    | BX016 | RX016-Cy5 | 1:50  | Biologend | 847002                          |
| Cycle14 | Empty     |           |       |           |       |           |                                 |
|         | Empty     |           |       |           |       |           |                                 |
|         | BCL6      | K112-91   | BX041 | RX041-Cy5 | 1:50  | BD        | 561520                          |
| Cycle15 | Empty     |           |       |           |       |           |                                 |
|         | Empty     |           |       |           |       |           |                                 |
|         | Foxp3     | 259D/C7   | BX027 | RX027-Cy5 | 1:40  | BD        | 560044                          |
| Cycle16 | Empty     |           |       |           |       |           |                                 |
|         | Empty     |           |       |           |       |           |                                 |
|         | LIF       | M1506B09  | BX006 | RX006-Cy5 | 1:200 | Akoya     | (custom; 674702 from Biologend) |
| Cycle17 | Empty     |           |       |           |       |           |                                 |
|         | Empty     |           |       |           |       |           |                                 |
|         | GranzymeB | D6E9W     | BX046 | RX046-Cy5 | 1:50  | CST       | 79903SF                         |
| Cycle18 | Empty     |           |       |           |       |           |                                 |
|         | Empty     |           |       |           |       |           |                                 |
|         | BCL2      | N46-467   | BX029 | RX029-Cy5 | 1:50  | BD        | N46-467                         |
| Cycle19 | Empty     |           |       |           |       |           |                                 |
|         | Empty     |           |       |           |       |           |                                 |
|         | Keratin5  | Poly19055 | BX005 | RX005-Cy5 | 1:50  | Biologend | 905504                          |
| Cycle20 | blank     |           |       |           |       |           |                                 |
|         | blank     |           |       |           |       |           |                                 |
|         | blank     |           |       |           |       |           |                                 |

### Supplementary Table 9 – CODEX 34-Antibody Panel Design

This table lists the cycle order and description of the 34 antibodies run in the CODEX panel. The columns listed (from left to right) indicate, the cycle, the antibody, the clone, the reporter, the dilution ratio use, antibody vendor and antibody catalog number.

Supplementary Table 10 – Top Gene Markers Expressed for Breast Cell States

| Cell state   | Gene       | Average    |       |            | Cell state   | Gene    | Average    |       |       |
|--------------|------------|------------|-------|------------|--------------|---------|------------|-------|-------|
|              |            | LogFC      | pct1  | pct2       |              |         | LogFC      | pct1  | pct2  |
| Basal        |            | Epithelial |       |            | LumSec-major |         | Epithelial |       |       |
|              | TAGLN      | 3.071      | 0.958 | 0.182      |              | SCGB3A1 | 1.248      | 0.696 | 0.304 |
|              | KRT14      | 3.012      | 0.946 | 0.281      |              | CYP24A1 | 0.617      | 0.354 | 0.118 |
|              | ACTA2      | 2.899      | 0.902 | 0.089      |              | MSMO1   | 0.562      | 0.510 | 0.284 |
|              | TPM2       | 2.686      | 0.968 | 0.128      |              | MMP7    | 0.520      | 0.659 | 0.568 |
|              | KRT17      | 2.595      | 0.977 | 0.389      |              | TM4SF1  | 0.494      | 0.979 | 0.924 |
|              | MT2A       | 2.546      | 0.986 | 0.797      |              | HMGCS1  | 0.492      | 0.477 | 0.277 |
|              | DST        | 2.465      | 0.966 | 0.656      |              | PDCD4   | 0.450      | 0.830 | 0.597 |
|              | MYLK       | 2.282      | 0.832 | 0.046      |              | CALML5  | 0.449      | 0.373 | 0.108 |
|              | MT1X       | 2.242      | 0.898 | 0.474      |              | JUND    | 0.430      | 0.937 | 0.823 |
|              | CXCL14     | 2.095      | 0.586 | 0.055      |              | RPS18   | 0.424      | 0.999 | 0.997 |
|              | KRT5       | 2.095      | 0.929 | 0.212      |              | RACK1   | 0.422      | 0.993 | 0.978 |
|              | APOE       | 1.965      | 0.710 | 0.164      |              | IDI1    | 0.409      | 0.597 | 0.377 |
|              | SPARCL1    | 1.937      | 0.795 | 0.129      |              | RPLP0   | 0.401      | 0.996 | 0.984 |
|              | ACTG2      | 1.909      | 0.665 | 0.031      |              | RPS21   | 0.400      | 0.984 | 0.973 |
|              | C2orf40    | 1.863      | 0.717 | 0.031      |              | FAM3B   | 0.400      | 0.535 | 0.121 |
|              | CALD1      | 1.787      | 0.965 | 0.443      |              | DBI     | 0.399      | 0.940 | 0.821 |
|              | CNN1       | 1.771      | 0.735 | 0.032      |              | PIGR    | 0.397      | 0.751 | 0.588 |
|              | MT1E       | 1.752      | 0.778 | 0.380      |              | RPS8    | 0.396      | 0.997 | 0.995 |
| MYL9         | 1.677      | 0.802      | 0.189 | RPS28      | 0.394        | 0.996   | 0.991      |       |       |
| NNMT         | 1.668      | 0.921      | 0.398 | MT-ND6     | 0.386        | 0.792   | 0.575      |       |       |
| LumHR-major  | S100A6     | 0.77       | 0.976 | 0.906      | PLCG2        | 4.012   | 0.933      | 0.535 |       |
|              | TNFRSF11B  | 0.65       | 0.319 | 0.130      | MAFB         | 1.930   | 0.551      | 0.128 |       |
|              | AC097059.1 | 0.61       | 0.322 | 0.143      | SOX4         | 1.693   | 0.767      | 0.594 |       |
|              | FAM107B    | 0.58       | 0.811 | 0.670      | JUN          | 1.649   | 0.928      | 0.857 |       |
|              | ITGA2      | 0.52       | 0.750 | 0.599      | HES1         | 1.591   | 0.602      | 0.292 |       |
|              | C15orf48   | 0.48       | 0.629 | 0.442      | HEXIM1       | 1.513   | 0.503      | 0.227 |       |
|              | SYTL4      | 0.48       | 0.508 | 0.318      | CSKMT        | 1.486   | 0.448      | 0.160 |       |
|              | TUBA1C     | 0.48       | 0.902 | 0.813      | FOSB         | 1.454   | 0.800      | 0.626 |       |
|              | IER5       | 0.46       | 0.747 | 0.615      | HIST1H4C     | 1.391   | 0.550      | 0.473 |       |
|              | NFKBIA     | 0.46       | 0.865 | 0.805      | GOLGA8A      | 1.391   | 0.504      | 0.197 |       |
|              | RBP1       | 0.45       | 0.629 | 0.452      | FOS          | 1.333   | 0.850      | 0.638 |       |
|              | SYTL2      | 0.45       | 0.837 | 0.691      | SLC38A2      | 1.262   | 0.634      | 0.564 |       |
|              | KRT8       | 0.42       | 0.981 | 0.973      | IER5L        | 1.253   | 0.430      | 0.192 |       |
|              | ATP1B1     | 0.42       | 0.879 | 0.777      | AL355075.4   | 1.242   | 0.318      | 0.093 |       |
|              | SPINK1     | 0.39       | 0.194 | 0.100      | HSPA2        | 1.224   | 0.331      | 0.075 |       |
|              | PAWR       | 0.39       | 0.876 | 0.794      | NR4A1        | 1.207   | 0.467      | 0.226 |       |
|              | HMGA1      | 0.38       | 0.718 | 0.568      | HSPA1B       | 1.172   | 0.482      | 0.459 |       |
| ARID5B       | 0.38       | 0.824      | 0.753 | XIST       | 1.164        | 0.818   | 0.819      |       |       |
| TNFRSF12A    | 0.38       | 0.954      | 0.896 | IGKC       | 1.153        | 0.474   | 0.328      |       |       |
| S100A14      | 0.37       | 0.961      | 0.880 | AC023157.3 | 1.123        | 0.266   | 0.046      |       |       |
| LumHR-active | CXCL13     | 1.753      | 0.456 | 0.039      | CCL20        | 2.771   | 0.422      | 0.080 |       |
|              | DIO2       | 1.344      | 0.473 | 0.134      | PI3          | 1.999   | 0.579      | 0.278 |       |
|              | TFF3       | 1.025      | 0.853 | 0.490      | SAT1         | 1.702   | 0.975      | 0.790 |       |
|              | MYBPC1     | 0.889      | 0.683 | 0.207      | CD74         | 1.613   | 0.898      | 0.489 |       |
|              | EREG       | 0.851      | 0.500 | 0.208      | TMSB4X       | 1.530   | 0.991      | 0.762 |       |
|              | SLC26A3    | 0.820      | 0.394 | 0.154      | HSPB1        | 1.481   | 0.735      | 0.181 |       |
|              | PTHLH      | 0.726      | 0.739 | 0.323      | RBP1         | 1.465   | 0.931      | 0.192 |       |
|              | FASN       | 0.689      | 0.815 | 0.473      | SLPI         | 1.361   | 0.982      | 0.831 |       |
|              | MS4A7      | 0.651      | 0.332 | 0.135      | CRABP2       | 1.354   | 0.955      | 0.504 |       |
|              | TFF1       | 0.621      | 0.590 | 0.353      | IER3         | 1.273   | 0.919      | 0.691 |       |
|              | PLCG2      | 0.567      | 0.474 | 0.419      | HIST1H1C     | 1.221   | 0.755      | 0.291 |       |
|              | PNMT       | 0.552      | 0.367 | 0.066      | SPARCL1      | 1.184   | 0.671      | 0.167 |       |
|              | CA2        | 0.545      | 0.398 | 0.145      | HLA-DRB1     | 1.182   | 0.720      | 0.259 |       |
|              | C2CD4A     | 0.510      | 0.422 | 0.150      | NFKBIA       | 1.177   | 0.949      | 0.804 |       |
|              | GSTM3      | 0.506      | 0.825 | 0.664      | SELENOM      | 1.159   | 0.958      | 0.603 |       |
|              | KCNMA1     | 0.479      | 0.530 | 0.243      | HLA-DRA      | 1.097   | 0.721      | 0.283 |       |
|              | NNMT       | 0.441      | 0.559 | 0.356      | SNCG         | 1.029   | 0.547      | 0.124 |       |
|              | ANKRD30A   | 0.439      | 0.941 | 0.789      | IFI27        | 1.007   | 0.420      | 0.055 |       |
|              | EFHD1      | 0.434      | 0.885 | 0.748      | SERPINB1     | 1.000   | 0.861      | 0.475 |       |
| RGS1         | 0.406      | 0.101      | 0.020 | ANXA1      | 0.986        | 0.999   | 0.877      |       |       |



| Cell state  | Gene     | Average LogFC | pct1  | pct2  |
|-------------|----------|---------------|-------|-------|
| LumHR-SCGB  | SCGB2A2  | 3.390         | 0.411 | 0.189 |
|             | PIP      | 3.166         | 0.816 | 0.291 |
|             | SCGB1D2  | 2.886         | 0.224 | 0.068 |
|             | MUCL1    | 2.463         | 0.684 | 0.348 |
|             | SCGB3A1  | 2.070         | 0.545 | 0.264 |
|             | SERPINA1 | 1.431         | 0.551 | 0.220 |
|             | TFPI2    | 1.413         | 0.330 | 0.035 |
|             | APOD     | 1.043         | 0.404 | 0.282 |
|             | CP       | 1.033         | 0.282 | 0.061 |
|             | KRT23    | 0.835         | 0.433 | 0.196 |
|             | HMGB3    | 0.771         | 0.382 | 0.201 |
|             | SAA1     | 0.770         | 0.237 | 0.149 |
|             | MGP      | 0.707         | 0.978 | 0.964 |
|             | CA2      | 0.688         | 0.221 | 0.167 |
|             | TAT      | 0.648         | 0.202 | 0.059 |
|             | SOD2     | 0.618         | 0.652 | 0.560 |
|             | CITED1   | 0.595         | 0.329 | 0.198 |
|             | CYP4X1   | 0.589         | 0.346 | 0.040 |
|             | TNFSF10  | 0.585         | 0.535 | 0.301 |
|             | CCL2     | 0.577         | 0.192 | 0.146 |
| LumSec-prol | HMGB2    | 1.645         | 0.706 | 0.350 |
|             | TUBA1B   | 1.471         | 0.940 | 0.885 |
|             | HMGN2    | 1.429         | 0.797 | 0.721 |
|             | TOP2A    | 1.427         | 0.435 | 0.005 |
|             | PTTG1    | 1.400         | 0.481 | 0.091 |
|             | UBE2C    | 1.398         | 0.471 | 0.011 |
|             | HIST1H4C | 1.389         | 0.527 | 0.477 |
|             | TYMS     | 1.376         | 0.550 | 0.019 |
|             | NUSAP1   | 1.375         | 0.487 | 0.029 |
|             | PCLAF    | 1.357         | 0.536 | 0.010 |
|             | HMGB1    | 1.321         | 0.952 | 0.939 |
|             | PCNA     | 1.314         | 0.502 | 0.150 |
|             | TUBB     | 1.310         | 0.830 | 0.678 |
|             | IGKC     | 1.301         | 0.491 | 0.333 |
|             | H2AFZ    | 1.294         | 0.890 | 0.841 |
|             | DUT      | 1.140         | 0.677 | 0.571 |
| CDK1        | 1.094    | 0.405         | 0.004 |       |
| CENPW       | 1.053    | 0.476         | 0.141 |       |
| TK1         | 1.049    | 0.421         | 0.014 |       |

| Cell state   | Gene    | Average LogFC | pct1  | pct2  |
|--------------|---------|---------------|-------|-------|
| LumSec-lac   | LALBA   | 5.632         | 0.757 | 0.017 |
|              | CSN1S1  | 4.658         | 0.935 | 0.018 |
|              | CSN2    | 4.538         | 0.618 | 0.006 |
|              | CSN3    | 4.296         | 0.921 | 0.016 |
|              | LYZ     | 3.320         | 0.306 | 0.013 |
|              | SPP1    | 2.869         | 0.462 | 0.039 |
|              | IGKC    | 2.030         | 0.632 | 0.331 |
|              | LTF     | 1.879         | 0.827 | 0.673 |
|              | FDCSP   | 1.859         | 0.495 | 0.109 |
|              | IGHA1   | 1.707         | 0.540 | 0.221 |
|              | FABP3   | 1.680         | 0.465 | 0.039 |
|              | ZG16B   | 1.628         | 0.485 | 0.278 |
|              | CLU     | 1.483         | 0.845 | 0.749 |
|              | PLIN2   | 1.467         | 0.569 | 0.314 |
|              | XDH     | 1.298         | 0.333 | 0.089 |
|              | S100A1  | 1.170         | 0.766 | 0.659 |
|              | PIGR    | 1.155         | 0.720 | 0.644 |
|              | HLA-DRA | 1.143         | 0.554 | 0.288 |
|              | CEL     | 1.106         | 0.205 | 0.002 |
| NUPR1        | 1.053   | 0.673         | 0.593 |       |
| LumSec-basal | PTN     | 2.235         | 0.667 | 0.127 |
|              | WFDC2   | 1.879         | 0.918 | 0.414 |
|              | MGP     | 1.547         | 0.993 | 0.953 |
|              | RARRES1 | 1.380         | 0.683 | 0.283 |
|              | SCGB2A2 | 1.331         | 0.692 | 0.346 |
|              | KRT6B   | 1.219         | 0.659 | 0.237 |
|              | CXCL8   | 1.197         | 0.394 | 0.198 |
|              | S100A8  | 1.084         | 0.238 | 0.086 |
|              | CCL2    | 1.049         | 0.317 | 0.196 |
|              | S100A6  | 1.005         | 0.996 | 0.920 |
|              | S100A9  | 0.977         | 0.615 | 0.367 |
|              | KRT14   | 0.960         | 0.590 | 0.273 |
|              | KRT17   | 0.959         | 0.629 | 0.313 |
|              | KRT81   | 0.927         | 0.221 | 0.104 |
|              | S100A10 | 0.889         | 0.950 | 0.735 |
|              | LCN2    | 0.855         | 0.592 | 0.314 |
| PI3          | 0.835   | 0.408         | 0.156 |       |
| KRT23        | 0.826   | 0.818         | 0.518 |       |
| ADIRF        | 0.792   | 0.716         | 0.288 |       |
| LTF          | 0.771   | 0.813         | 0.531 |       |
| LumSec-myo   | ACTA2   | 2.068         | 0.863 | 0.076 |
|              | TAGLN   | 1.915         | 0.932 | 0.216 |
|              | DST     | 1.858         | 0.948 | 0.675 |
|              | TPM2    | 1.853         | 0.929 | 0.128 |
|              | MT2A    | 1.722         | 0.972 | 0.720 |
|              | MYLK    | 1.498         | 0.770 | 0.038 |
|              | KRT14   | 1.447         | 0.911 | 0.421 |
|              | CXCL14  | 1.418         | 0.575 | 0.046 |
|              | KRT17   | 1.338         | 0.954 | 0.460 |
|              | APOE    | 1.320         | 0.694 | 0.229 |
|              | SPARCL1 | 1.238         | 0.788 | 0.159 |
|              | C2orf40 | 1.179         | 0.661 | 0.029 |
|              | CNN1    | 1.091         | 0.660 | 0.020 |
|              | ACTG2   | 1.040         | 0.578 | 0.028 |
|              | MYL9    | 1.005         | 0.735 | 0.173 |
|              | MT1E    | 0.963         | 0.718 | 0.331 |
|              | NNMT    | 0.956         | 0.859 | 0.402 |
|              | IGFBP2  | 0.945         | 0.527 | 0.040 |
|              | THBS1   | 0.897         | 0.731 | 0.297 |
| POSTN        | 0.889   | 0.460         | 0.022 |       |

Supplementary Table 10: Top Gene Markers Expressed for Breast Cell States

| Cell state            | Gene      | Average |       |       |
|-----------------------|-----------|---------|-------|-------|
|                       |           | LogFC   | pct1  | pct2  |
| <b>Fibroblasts</b>    |           |         |       |       |
| Fibro-matrix          | COL3A1    | 1.625   | 0.943 | 0.552 |
|                       | POSTN     | 1.482   | 0.688 | 0.220 |
|                       | COL1A1    | 1.345   | 0.943 | 0.646 |
|                       | IGF1      | 1.306   | 0.931 | 0.620 |
|                       | IGFBP2    | 1.158   | 0.591 | 0.133 |
|                       | ADAM12    | 1.086   | 0.740 | 0.199 |
|                       | TNC       | 1.016   | 0.391 | 0.072 |
|                       | DLK1      | 0.952   | 0.573 | 0.176 |
|                       | COL5A2    | 0.914   | 0.779 | 0.415 |
|                       | PENK      | 0.900   | 0.145 | 0.049 |
|                       | ECEL1     | 0.831   | 0.324 | 0.008 |
|                       | COL15A1   | 0.830   | 0.788 | 0.427 |
|                       | TAC1      | 0.815   | 0.606 | 0.217 |
|                       | COL1A2    | 0.790   | 0.973 | 0.814 |
|                       | HGF       | 0.782   | 0.586 | 0.290 |
|                       | MXRA5     | 0.782   | 0.768 | 0.388 |
|                       | SPARC     | 0.773   | 0.932 | 0.711 |
|                       | APOE      | 0.739   | 0.902 | 0.531 |
|                       | TGFBI     | 0.736   | 0.610 | 0.198 |
|                       | HSPA6     | 0.714   | 0.140 | 0.063 |
| Fibro-major           | MMMP3     | 1.529   | 0.251 | 0.135 |
|                       | CXCL1     | 0.890   | 0.508 | 0.338 |
|                       | GEM       | 0.612   | 0.922 | 0.737 |
|                       | KDM6B     | 0.593   | 0.811 | 0.626 |
|                       | CEBPB     | 0.587   | 0.972 | 0.899 |
|                       | TNFAIP6   | 0.574   | 0.893 | 0.724 |
|                       | CXCL2     | 0.537   | 0.559 | 0.415 |
|                       | SAT1      | 0.523   | 0.893 | 0.842 |
|                       | TNFRSF12A | 0.510   | 0.723 | 0.552 |
|                       | IGKC      | 0.500   | 0.497 | 0.356 |
|                       | GPRC5A    | 0.499   | 0.674 | 0.533 |
|                       | SERPINE2  | 0.493   | 0.497 | 0.418 |
|                       | MEG3      | 0.491   | 0.883 | 0.830 |
|                       | THBS1     | 0.477   | 0.620 | 0.462 |
|                       | H2AFZ     | 0.476   | 0.865 | 0.763 |
|                       | PLAUR     | 0.471   | 0.522 | 0.369 |
|                       | CTSL      | 0.462   | 0.881 | 0.813 |
|                       | ADPRHL1   | 0.461   | 0.209 | 0.085 |
|                       | CXCL3     | 0.459   | 0.353 | 0.251 |
|                       | CREM      | 0.433   | 0.349 | 0.250 |
| Fibro-prematrix       | CFD       | 1.536   | 0.951 | 0.737 |
|                       | FOS       | 1.525   | 0.703 | 0.464 |
|                       | GPX3      | 1.469   | 0.760 | 0.236 |
|                       | PLA2G2A   | 1.446   | 0.308 | 0.024 |
|                       | WISP2     | 1.423   | 0.742 | 0.199 |
|                       | MGST1     | 1.323   | 0.675 | 0.200 |
|                       | MFAP5     | 1.312   | 0.590 | 0.186 |
|                       | ADH1B     | 1.310   | 0.660 | 0.149 |
|                       | JUN       | 1.224   | 0.852 | 0.628 |
|                       | GSN       | 1.188   | 0.985 | 0.960 |
|                       | GPC3      | 1.174   | 0.888 | 0.529 |
|                       | IGFBP6    | 1.053   | 0.854 | 0.630 |
|                       | CXCL14    | 1.045   | 0.646 | 0.457 |
|                       | PCOLCE2   | 1.045   | 0.444 | 0.044 |
|                       | FBLN2     | 1.012   | 0.742 | 0.390 |
|                       | C3        | 0.966   | 0.879 | 0.504 |
|                       | TXNIP     | 0.930   | 0.738 | 0.487 |
|                       | S100A4    | 0.892   | 0.908 | 0.777 |
|                       | S100A10   | 0.887   | 0.951 | 0.859 |
|                       | C7        | 0.872   | 0.267 | 0.083 |
| Fibro-SFRP4           | SFRP4     | 3.597   | 0.901 | 0.194 |
|                       | CLU       | 2.332   | 0.993 | 0.416 |
|                       | GOS2      | 1.909   | 0.317 | 0.088 |
|                       | MGP       | 1.693   | 0.993 | 0.956 |
|                       | OGN       | 1.475   | 0.931 | 0.577 |
|                       | ADIRF     | 1.387   | 0.891 | 0.614 |
|                       | IGFBP5    | 1.339   | 0.771 | 0.379 |
|                       | BGN       | 1.241   | 0.793 | 0.339 |
|                       | IGFBP6    | 1.170   | 0.965 | 0.681 |
|                       | CD9       | 1.143   | 0.855 | 0.261 |
|                       | RRAD      | 1.137   | 0.406 | 0.052 |
|                       | LTBP1     | 1.133   | 0.732 | 0.157 |
|                       | CRYAB     | 1.115   | 0.644 | 0.257 |
|                       | PDK4      | 1.098   | 0.598 | 0.255 |
|                       | PRG4      | 1.095   | 0.168 | 0.033 |
|                       | ABI3BP    | 1.085   | 0.894 | 0.477 |
|                       | KCNMA1    | 1.048   | 0.436 | 0.012 |
|                       | COL14A1   | 0.997   | 0.900 | 0.620 |
|                       | GREM1     | 0.915   | 0.434 | 0.052 |
|                       | ASPN      | 0.907   | 0.624 | 0.210 |
| <b>Vascular cells</b> |           |         |       |       |
| Vas-arterial          | IGFBP3    | 2.191   | 0.660 | 0.155 |
|                       | CXCL12    | 1.517   | 0.565 | 0.147 |
|                       | FOS       | 1.437   | 0.661 | 0.407 |
|                       | CXCL3     | 1.367   | 0.362 | 0.181 |
|                       | HEY1      | 1.353   | 0.582 | 0.110 |
|                       | FN1       | 1.240   | 0.467 | 0.123 |
|                       | TCIM      | 1.114   | 0.371 | 0.180 |
|                       | BTG2      | 1.086   | 0.642 | 0.426 |
|                       | DUSP1     | 1.085   | 0.775 | 0.572 |
|                       | EGR1      | 1.083   | 0.535 | 0.321 |
|                       | GADD45B   | 1.083   | 0.721 | 0.597 |
|                       | RHOB      | 1.069   | 0.790 | 0.527 |
|                       | JUN       | 1.046   | 0.845 | 0.748 |
|                       | SEMA3G    | 1.042   | 0.405 | 0.040 |
|                       | ZFP36     | 1.041   | 0.809 | 0.678 |
|                       | FOSB      | 1.007   | 0.578 | 0.363 |
|                       | HES1      | 0.989   | 0.482 | 0.357 |
|                       | PLPP1     | 0.980   | 0.546 | 0.263 |
|                       | RASD1     | 0.974   | 0.343 | 0.117 |
|                       | IER2      | 0.939   | 0.750 | 0.661 |
| Vas-capillary         | RBP7      | 1.328   | 0.737 | 0.471 |
|                       | FABP4     | 1.319   | 0.769 | 0.623 |
|                       | RGCC      | 1.197   | 0.618 | 0.170 |
|                       | ESM1      | 1.196   | 0.216 | 0.027 |
|                       | CD36      | 1.126   | 0.658 | 0.415 |
|                       | CA4       | 1.112   | 0.324 | 0.040 |
|                       | C11orf96  | 1.098   | 0.533 | 0.328 |
|                       | BTNL9     | 1.052   | 0.472 | 0.104 |
|                       | COL4A1    | 0.968   | 0.743 | 0.483 |
|                       | SPP1      | 0.946   | 0.160 | 0.036 |
|                       | APOD      | 0.891   | 0.566 | 0.370 |
|                       | ADGRF5    | 0.867   | 0.701 | 0.309 |
|                       | MT1M      | 0.839   | 0.395 | 0.249 |
|                       | CD300LG   | 0.802   | 0.337 | 0.064 |
|                       | KDR       | 0.767   | 0.544 | 0.294 |
|                       | ITGA1     | 0.765   | 0.481 | 0.234 |
|                       | COL4A2    | 0.759   | 0.630 | 0.397 |
|                       | MLEC      | 0.759   | 0.479 | 0.169 |
|                       | SPARC     | 0.748   | 0.853 | 0.677 |
|                       | MT1A      | 0.730   | 0.447 | 0.328 |
| Vas-venous            | SELE      | 2.554   | 0.712 | 0.104 |
|                       | ACKR1     | 2.123   | 0.832 | 0.197 |
|                       | CSF3      | 1.981   | 0.655 | 0.154 |
|                       | IL6       | 1.753   | 0.601 | 0.187 |
|                       | GOS2      | 1.504   | 0.399 | 0.114 |
|                       | CLU       | 1.167   | 0.810 | 0.360 |
|                       | MMP1      | 1.152   | 0.169 | 0.067 |
|                       | ADIRF     | 1.063   | 0.850 | 0.530 |
|                       | CYP1B1    | 1.049   | 0.328 | 0.119 |
|                       | SELP      | 0.965   | 0.511 | 0.027 |
|                       | CXCL1     | 0.922   | 0.219 | 0.147 |
|                       | VCAM1     | 0.905   | 0.327 | 0.050 |
|                       | IL1R1     | 0.837   | 0.630 | 0.259 |
|                       | CNKS3     | 0.830   | 0.599 | 0.193 |
|                       | TFPI      | 0.786   | 0.816 | 0.325 |
|                       | MED24     | 0.784   | 0.397 | 0.111 |
|                       | CXCL8     | 0.766   | 0.419 | 0.259 |
|                       | PMP22     | 0.724   | 0.609 | 0.237 |
|                       | VCAN      | 0.719   | 0.377 | 0.032 |
|                       | CST3      | 0.701   | 0.910 | 0.674 |

Supplementary Table 10: Top Gene Markers Expressed for Breast Cell States

| Cell state             | Gene     | Average |       |       | Cell state                | Gene     | Average |       |       |
|------------------------|----------|---------|-------|-------|---------------------------|----------|---------|-------|-------|
|                        |          | LogFC   | pct1  | pct2  |                           |          | LogFC   | pct1  | pct2  |
| <b>Lymphatic cells</b> |          |         |       |       | <b>Perivascular cells</b> |          |         |       |       |
| Lymph-major            | FABP4    | 2.083   | 0.855 | 0.267 | Pericyte                  | COL6A3   | 1.489   | 0.584 | 0.044 |
|                        | LYVE1    | 2.039   | 0.746 | 0.085 |                           | SERPINE1 | 1.472   | 0.311 | 0.098 |
|                        | CCL21    | 2.037   | 0.945 | 0.529 |                           | CXCL3    | 1.464   | 0.223 | 0.104 |
|                        | FABP5    | 1.359   | 0.842 | 0.453 |                           | CTSC     | 1.423   | 0.563 | 0.078 |
|                        | PRSS23   | 1.214   | 0.654 | 0.221 |                           | CFD      | 1.295   | 0.421 | 0.159 |
|                        | CYR61    | 1.200   | 0.552 | 0.250 |                           | CD36     | 1.271   | 0.414 | 0.063 |
|                        | MMRN1    | 1.107   | 0.930 | 0.698 |                           | CCL19    | 1.212   | 0.102 | 0.013 |
|                        | NRP2     | 1.065   | 0.700 | 0.361 |                           | CYP1B1   | 1.194   | 0.312 | 0.044 |
|                        | PLCG2    | 1.012   | 0.459 | 0.417 |                           | STEAP4   | 1.158   | 0.685 | 0.309 |
|                        | IGF1     | 0.997   | 0.461 | 0.152 |                           | EMP1     | 1.154   | 0.581 | 0.23  |
|                        | RGS16    | 0.904   | 0.630 | 0.403 |                           | MARCKS   | 1.142   | 0.613 | 0.174 |
|                        | EFEMP1   | 0.804   | 0.714 | 0.497 |                           | CCL2     | 1.126   | 0.73  | 0.563 |
|                        | TM4SF18  | 0.800   | 0.491 | 0.192 |                           | C1R      | 1.087   | 0.559 | 0.127 |
|                        | LOX      | 0.786   | 0.381 | 0.086 |                           | TFPI     | 1.072   | 0.704 | 0.301 |
|                        | FN1      | 0.785   | 0.524 | 0.284 |                           | CXCL8    | 1.063   | 0.274 | 0.193 |
|                        | RELN     | 0.765   | 0.390 | 0.079 |                           | EDNRB    | 1.057   | 0.632 | 0.302 |
|                        | GNG11    | 0.741   | 0.910 | 0.840 |                           | S100A10  | 1.051   | 0.56  | 0.176 |
|                        | SOD2     | 0.738   | 0.525 | 0.526 |                           | FGF7     | 1.048   | 0.397 | 0.1   |
|                        | CTGF     | 0.738   | 0.393 | 0.267 |                           | GUCY1A2  | 1.033   | 0.44  | 0.094 |
|                        | ANXA1    | 0.733   | 0.701 | 0.488 |                           | GGT5     | 1.028   | 0.437 | 0.051 |
| Lymph-valve1           | SCG3     | 2.849   | 0.798 | 0.049 | VSMC                      | MYH11    | 1.821   | 0.656 | 0.085 |
|                        | GJA4     | 1.428   | 0.577 | 0.032 |                           | RERGL    | 1.491   | 0.472 | 0.008 |
|                        | HGF      | 1.389   | 0.548 | 0.019 |                           | DSTN     | 1.340   | 0.928 | 0.678 |
|                        | ADM      | 1.077   | 0.783 | 0.407 |                           | CREM     | 1.334   | 0.523 | 0.281 |
|                        | CLDN11   | 1.074   | 0.480 | 0.032 |                           | CRYAB    | 1.330   | 0.718 | 0.282 |
|                        | FOXC2    | 1.019   | 0.645 | 0.235 |                           | PLN      | 1.286   | 0.528 | 0.036 |
|                        | SOCS2    | 0.938   | 0.788 | 0.380 |                           | SORBS2   | 1.155   | 0.587 | 0.134 |
|                        | NUDT9    | 0.927   | 0.528 | 0.126 |                           | TSC22D1  | 1.109   | 0.809 | 0.373 |
|                        | EDNRB    | 0.907   | 0.776 | 0.418 |                           | NDUFA4   | 1.103   | 0.742 | 0.311 |
|                        | MYLIP    | 0.896   | 0.602 | 0.180 |                           | TPM2     | 1.098   | 0.927 | 0.7   |
|                        | ODC1     | 0.886   | 0.755 | 0.428 |                           | ADIRF    | 1.095   | 0.938 | 0.746 |
|                        | OAZ1     | 0.879   | 0.967 | 0.829 |                           | NET1     | 1.083   | 0.436 | 0.026 |
|                        | DSEL     | 0.872   | 0.480 | 0.090 |                           | GADD45B  | 1.076   | 0.908 | 0.622 |
|                        | DEGS2    | 0.828   | 0.370 | 0.013 |                           | GADD45G  | 1.070   | 0.385 | 0.061 |
|                        | C17orf58 | 0.825   | 0.538 | 0.156 |                           | BCAM     | 1.054   | 0.523 | 0.087 |
|                        | CLDN5    | 0.812   | 0.985 | 0.869 |                           | MCAM     | 1.034   | 0.793 | 0.365 |
|                        | NAV1     | 0.803   | 0.482 | 0.096 |                           | ZNF331   | 0.999   | 0.478 | 0.234 |
|                        | CDC42EP5 | 0.780   | 0.724 | 0.442 |                           | CMSS1    | 0.977   | 0.325 | 0.23  |
|                        | CFH      | 0.776   | 0.559 | 0.210 |                           | MYL9     | 0.964   | 0.833 | 0.63  |
|                        | PPP1R14B | 0.772   | 0.763 | 0.466 |                           | CYCS     | 0.927   | 0.802 | 0.661 |
| Lymph-immune           | NTS      | 2.824   | 0.747 | 0.095 | Lymph-valve2              | CD24     | 2.275   | 0.725 | 0.119 |
|                        | CXCL2    | 2.267   | 0.753 | 0.280 |                           | SLC41A1  | 1.594   | 0.799 | 0.276 |
|                        | CXCL1    | 2.253   | 0.487 | 0.145 |                           | ADAMTS1  | 1.485   | 0.633 | 0.114 |
|                        | CXCL8    | 2.212   | 0.565 | 0.241 |                           | CALM1    | 1.461   | 0.987 | 0.786 |
|                        | CLU      | 2.021   | 0.916 | 0.523 |                           | NEO1     | 1.456   | 0.703 | 0.125 |
|                        | IGFBP5   | 2.009   | 0.318 | 0.098 |                           | TRDC     | 1.320   | 0.581 | 0.040 |
|                        | PTGS2    | 1.809   | 0.597 | 0.031 |                           | ODC1     | 1.263   | 0.860 | 0.432 |
|                        | CXCL3    | 1.751   | 0.396 | 0.117 |                           | TTN      | 1.123   | 0.598 | 0.199 |
|                        | CSF3     | 1.742   | 0.442 | 0.055 |                           | MDK      | 1.111   | 0.734 | 0.290 |
|                        | CCL2     | 1.628   | 0.649 | 0.357 |                           | GSTM3    | 1.074   | 0.664 | 0.177 |
|                        | PLAT     | 1.544   | 0.565 | 0.072 |                           | SLC5A3   | 1.038   | 0.699 | 0.321 |
|                        | TGM2     | 1.477   | 0.662 | 0.061 |                           | SBSPON   | 1.033   | 0.568 | 0.067 |
|                        | AKR1C2   | 1.441   | 0.558 | 0.219 |                           | ALCAM    | 1.013   | 0.415 | 0.037 |
|                        | SERPINB1 | 1.395   | 0.643 | 0.165 |                           | KCNJ2    | 1.007   | 0.415 | 0.007 |
|                        | MT1X     | 1.279   | 0.773 | 0.313 |                           | ISYNA1   | 0.994   | 0.611 | 0.110 |
|                        | IL6      | 1.244   | 0.286 | 0.051 |                           | MRPS6    | 0.921   | 0.738 | 0.391 |
|                        | AKR1C1   | 1.204   | 0.695 | 0.440 |                           | IRX3     | 0.881   | 0.424 | 0.027 |
|                        | SAT1     | 1.189   | 0.864 | 0.635 |                           | DPP4     | 0.872   | 0.638 | 0.200 |
|                        | SRGN     | 1.185   | 0.565 | 0.091 |                           | SOX4     | 0.870   | 0.956 | 0.679 |
|                        | MED24    | 1.140   | 0.422 | 0.085 |                           | NPPC     | 0.852   | 0.341 | 0.059 |

Supplementary Table 10: Top Gene Markers Expressed for Breast Cell States

| Cell state             | Gene      | Average |       |       |
|------------------------|-----------|---------|-------|-------|
|                        |           | LogFC   | pct1  | pct2  |
| <b>B cells</b>         |           |         |       |       |
| <b>Bnaive</b>          | YBX3      | 1.602   | 0.621 | 0.206 |
|                        | CD37      | 1.133   | 0.938 | 0.471 |
|                        | TCL1A     | 1.082   | 0.304 | 0.003 |
|                        | PLCG2     | 1.058   | 0.515 | 0.444 |
|                        | KLF2      | 1.053   | 0.656 | 0.408 |
|                        | CD79B     | 1.051   | 0.583 | 0.289 |
|                        | CD74      | 1.041   | 0.987 | 0.868 |
|                        | HLA-DRA   | 1.033   | 0.980 | 0.441 |
|                        | HLA-DRB1  | 1.010   | 0.945 | 0.412 |
|                        | LAPTM5    | 1.001   | 0.865 | 0.407 |
|                        | BTG1      | 1.000   | 0.982 | 0.884 |
|                        | HLA-DQA2  | 0.993   | 0.390 | 0.108 |
|                        | HLA-DPB1  | 0.990   | 0.936 | 0.392 |
|                        | CD69      | 0.971   | 0.461 | 0.190 |
|                        | HLA-DQB1  | 0.967   | 0.831 | 0.370 |
|                        | HLA-DMB   | 0.963   | 0.559 | 0.163 |
|                        | LINC00926 | 0.961   | 0.551 | 0.172 |
|                        | RCSD1     | 0.960   | 0.565 | 0.241 |
|                        | STK17A    | 0.954   | 0.666 | 0.403 |
|                        | HLA-DPA1  | 0.915   | 0.894 | 0.434 |
| <b>Bmem-switched</b>   | LTB       | 1.117   | 0.800 | 0.222 |
|                        | HLA-DPB1  | 1.016   | 0.939 | 0.318 |
|                        | HLA-DRA   | 1.005   | 0.980 | 0.369 |
|                        | HLA-DPA1  | 0.922   | 0.895 | 0.372 |
|                        | MTRNR2L8  | 0.921   | 0.427 | 0.402 |
|                        | GPR183    | 0.904   | 0.551 | 0.141 |
|                        | HLA-DRB1  | 0.897   | 0.929 | 0.348 |
|                        | CD52      | 0.892   | 0.787 | 0.293 |
|                        | BANK1     | 0.883   | 0.707 | 0.207 |
|                        | SMCHD1    | 0.877   | 0.757 | 0.465 |
|                        | RPL27A    | 0.876   | 0.988 | 0.965 |
|                        | MS4A1     | 0.872   | 0.749 | 0.219 |
|                        | CD74      | 0.869   | 0.982 | 0.854 |
|                        | HLA-A     | 0.867   | 0.946 | 0.827 |
|                        | RPS20     | 0.858   | 0.985 | 0.948 |
|                        | RPS12     | 0.858   | 0.996 | 0.990 |
|                        | RPL13A    | 0.851   | 0.997 | 0.985 |
|                        | RPL30     | 0.847   | 0.996 | 0.983 |
|                        | ATP1B3    | 0.831   | 0.565 | 0.430 |
|                        | TNFRSF13C | 0.821   | 0.720 | 0.352 |
| <b>Bmem-unswitched</b> | BCL2A1    | 1.898   | 0.790 | 0.098 |
|                        | DUSP2     | 1.733   | 0.748 | 0.156 |
|                        | MYC       | 1.628   | 0.693 | 0.153 |
|                        | MIR155HG  | 1.622   | 0.719 | 0.258 |
|                        | CD83      | 1.620   | 0.962 | 0.299 |
|                        | EGR3      | 1.464   | 0.536 | 0.041 |
|                        | REL       | 1.383   | 0.964 | 0.414 |
|                        | CD69      | 1.357   | 0.783 | 0.221 |
|                        | NFKBID    | 1.345   | 0.750 | 0.214 |
|                        | CCR7      | 1.344   | 0.779 | 0.249 |
|                        | PLEK      | 1.316   | 0.524 | 0.089 |
|                        | FABP5     | 1.288   | 0.469 | 0.104 |
|                        | ZFP36L1   | 1.253   | 0.898 | 0.454 |
|                        | HLA-DQA1  | 1.236   | 0.921 | 0.384 |
|                        | NR4A1     | 1.219   | 0.579 | 0.192 |
|                        | DDX21     | 1.212   | 0.845 | 0.478 |
|                        | NFKB1     | 1.200   | 0.790 | 0.324 |
|                        | HSP90AB1  | 1.164   | 0.979 | 0.874 |
|                        | CD70      | 1.126   | 0.498 | 0.068 |
|                        | PIKFYVE   | 1.121   | 0.633 | 0.132 |

  

| Cell state         | Gene     | Average |       |       |
|--------------------|----------|---------|-------|-------|
|                    |          | LogFC   | pct1  | pct2  |
| <b>B cells</b>     |          |         |       |       |
| <b>Bplasma-IgA</b> | IGHA2    | 5.091   | 0.851 | 0.154 |
|                    | IGHA1    | 4.812   | 0.958 | 0.452 |
|                    | JCHAIN   | 3.597   | 0.952 | 0.292 |
|                    | IGHM     | 2.222   | 0.220 | 0.543 |
|                    | IGLC2    | 2.105   | 0.650 | 0.408 |
|                    | IGLL5    | 1.910   | 0.285 | 0.049 |
|                    | IGLC3    | 1.818   | 0.504 | 0.320 |
|                    | SSR4     | 1.550   | 0.997 | 0.582 |
|                    | IGKC     | 1.496   | 0.885 | 0.799 |
|                    | DERL3    | 1.421   | 0.935 | 0.144 |
|                    | ANKRD28  | 1.413   | 0.923 | 0.152 |
|                    | VIM      | 1.408   | 0.990 | 0.714 |
|                    | GADD45A  | 1.362   | 0.659 | 0.159 |
|                    | MZB1     | 1.314   | 0.966 | 0.197 |
|                    | ERN1     | 1.291   | 0.770 | 0.099 |
|                    | IGHD     | 1.252   | 0.046 | 0.297 |
| HSPA5              | 1.196    | 0.891   | 0.354 |       |
| SEC11C             | 1.192    | 0.962   | 0.317 |       |
| NEAT1              | 1.187    | 0.980   | 0.748 |       |
| CYTOR              | 1.166    | 0.862   | 0.148 |       |
| <b>Bplasma-IgG</b> | IGHG1    | 4.581   | 0.919 | 0.153 |
|                    | IGHG4    | 4.160   | 0.792 | 0.056 |
|                    | IGHG3    | 3.895   | 0.888 | 0.143 |
|                    | IGHG2    | 3.843   | 0.618 | 0.078 |
|                    | IGHGP    | 2.609   | 0.388 | 0.008 |
|                    | IGLC7    | 1.812   | 0.112 | 0.079 |
|                    | IGKC     | 1.116   | 0.879 | 0.831 |
|                    | MZB1     | 0.954   | 0.912 | 0.482 |
|                    | PRDX4    | 0.853   | 0.787 | 0.446 |
|                    | DNAAF1   | 0.843   | 0.327 | 0.134 |
|                    | IGLV3-1  | 0.802   | 0.281 | 0.107 |
|                    | JSRP1    | 0.739   | 0.508 | 0.210 |
|                    | FKBP11   | 0.707   | 0.847 | 0.478 |
|                    | SSR4     | 0.702   | 0.986 | 0.733 |
|                    | IGKV3-20 | 0.692   | 0.139 | 0.053 |
|                    | XBP1     | 0.672   | 0.792 | 0.501 |
| ITM2C              | 0.642    | 0.638   | 0.381 |       |
| IGKV4-1            | 0.602    | 0.138   | 0.062 |       |
| PSAP               | 0.556    | 0.700   | 0.459 |       |
| NPC2               | 0.555    | 0.730   | 0.490 |       |

Supplementary Table 10: Top Gene Markers Expressed for Breast Cell States

| Cell state     | Gene     | Average |       |       | Cell state     | Gene     | Average |       |       |
|----------------|----------|---------|-------|-------|----------------|----------|---------|-------|-------|
|                |          | LogFC   | pct1  | pct2  |                |          | LogFC   | pct1  | pct2  |
| <b>T cells</b> |          |         |       |       | <b>T cells</b> |          |         |       |       |
| CD4-Th         | CCL20    | 1.498   | 0.294 | 0.032 | CD4-Tem        | HSPA1A   | 1.455   | 0.534 | 0.210 |
|                | KLRB1    | 0.808   | 0.776 | 0.402 |                | KLF6     | 1.371   | 0.898 | 0.621 |
|                | CCR6     | 0.759   | 0.488 | 0.143 |                | FOS      | 1.251   | 0.569 | 0.396 |
|                | IL7R     | 0.669   | 0.990 | 0.754 |                | HSP90AA1 | 1.083   | 0.955 | 0.895 |
|                | RORA     | 0.639   | 0.792 | 0.494 |                | FOSB     | 1.033   | 0.522 | 0.277 |
|                | MYBL1    | 0.595   | 0.443 | 0.190 |                | HSPA1B   | 1.015   | 0.290 | 0.090 |
|                | PTPN13   | 0.583   | 0.207 | 0.017 |                | DNAJA1   | 1.003   | 0.786 | 0.560 |
|                | CEBPD    | 0.575   | 0.366 | 0.163 |                | IFNG     | 0.980   | 0.240 | 0.073 |
|                | FURIN    | 0.552   | 0.308 | 0.089 |                | UBE2S    | 0.975   | 0.565 | 0.268 |
|                | LTB      | 0.545   | 0.566 | 0.311 |                | GADD45B  | 0.959   | 0.533 | 0.335 |
|                | RBMS1    | 0.542   | 0.493 | 0.247 |                | NFKBIA   | 0.924   | 0.670 | 0.481 |
|                | IL4I1    | 0.529   | 0.183 | 0.012 |                | JUN      | 0.920   | 0.704 | 0.489 |
|                | ODF2L    | 0.528   | 0.525 | 0.296 |                | HSP90AB1 | 0.919   | 0.928 | 0.829 |
|                | TNFRSF25 | 0.526   | 0.308 | 0.093 |                | LMNA     | 0.911   | 0.553 | 0.379 |
|                | MCAM     | 0.515   | 0.213 | 0.032 |                | TUBB4B   | 0.898   | 0.764 | 0.444 |
|                | ERN1     | 0.514   | 0.439 | 0.205 |                | PPP1R15A | 0.898   | 0.556 | 0.319 |
|                | IL18R1   | 0.508   | 0.307 | 0.101 |                | XCL1     | 0.890   | 0.250 | 0.123 |
|                | NFKBIA   | 0.505   | 0.654 | 0.473 |                | DNAJB1   | 0.880   | 0.550 | 0.360 |
|                | MAP3K4   | 0.500   | 0.262 | 0.072 |                | HSPH1    | 0.845   | 0.477 | 0.286 |
|                | TNFSF13B | 0.484   | 0.149 | 0.014 |                | TNFAIP3  | 0.845   | 0.785 | 0.644 |
| CD4-Thlike     | MAF      | 0.968   | 0.508 | 0.214 | CD4-Treg       | TIGIT    | 1.416   | 0.669 | 0.134 |
|                | PGAP1    | 0.665   | 0.247 | 0.072 |                | TBC1D4   | 1.235   | 0.539 | 0.072 |
|                | SOCS3    | 0.649   | 0.430 | 0.188 |                | BATF     | 1.195   | 0.608 | 0.179 |
|                | CMSS1    | 0.612   | 0.278 | 0.147 |                | CARD16   | 1.192   | 0.510 | 0.111 |
|                | GPR183   | 0.586   | 0.650 | 0.421 |                | CTLA4    | 1.162   | 0.498 | 0.056 |
|                | DDIT4    | 0.585   | 0.770 | 0.563 |                | MTRNR2L8 | 1.141   | 0.462 | 0.261 |
|                | ARID5B   | 0.582   | 0.618 | 0.339 |                | RTKN2    | 1.104   | 0.332 | 0.020 |
|                | CRYBG1   | 0.582   | 0.644 | 0.433 |                | IKZF2    | 1.012   | 0.404 | 0.036 |
|                | CH25H    | 0.579   | 0.118 | 0.022 |                | PMAIP1   | 1.008   | 0.436 | 0.114 |
|                | FTH1     | 0.567   | 0.996 | 0.982 |                | STAM     | 0.926   | 0.453 | 0.071 |
|                | SESN3    | 0.546   | 0.288 | 0.136 |                | HPGD     | 0.924   | 0.219 | 0.057 |
|                | NR3C1    | 0.513   | 0.705 | 0.477 |                | LTB      | 0.860   | 0.651 | 0.329 |
|                | ZFP36    | 0.507   | 0.829 | 0.663 |                | TNFRSF9  | 0.846   | 0.348 | 0.059 |
|                | SRGN     | 0.500   | 0.996 | 0.952 |                | TNFRSF4  | 0.818   | 0.299 | 0.085 |
|                | AP3M2    | 0.497   | 0.327 | 0.139 |                | SELL     | 0.792   | 0.354 | 0.068 |
|                | SLC2A3   | 0.495   | 0.564 | 0.354 |                | GK       | 0.780   | 0.254 | 0.024 |
|                | FRMD4B   | 0.472   | 0.214 | 0.063 |                | TNFRSF18 | 0.779   | 0.358 | 0.100 |
|                | GLIPR1   | 0.462   | 0.650 | 0.439 |                | LAYN     | 0.771   | 0.221 | 0.007 |
|                | ANXA1    | 0.442   | 0.849 | 0.710 |                | SESN3    | 0.766   | 0.418 | 0.160 |
|                | UGP2     | 0.435   | 0.431 | 0.265 |                | ARID5B   | 0.756   | 0.741 | 0.388 |
| CD4-naive      | MTRNR2L8 | 1.155   | 0.486 | 0.251 | CD4-activated  | HSPA1A   | 3.043   | 0.533 | 0.222 |
|                | LTB      | 1.038   | 0.816 | 0.304 |                | HSPA1B   | 2.798   | 0.493 | 0.091 |
|                | KLF2     | 1.006   | 0.730 | 0.222 |                | DNAJB1   | 2.521   | 0.528 | 0.367 |
|                | SELL     | 0.926   | 0.474 | 0.048 |                | PLCG2    | 2.404   | 0.816 | 0.352 |
|                | CCR7     | 0.860   | 0.542 | 0.129 |                | HSPA6    | 2.284   | 0.168 | 0.018 |
|                | SESN3    | 0.725   | 0.473 | 0.146 |                | HSP90AA1 | 1.654   | 0.825 | 0.901 |
|                | LDHB     | 0.637   | 0.804 | 0.400 |                | HSPH1    | 1.525   | 0.388 | 0.296 |
|                | TSHZ2    | 0.624   | 0.284 | 0.031 |                | HSPD1    | 1.260   | 0.468 | 0.532 |
|                | LEF1     | 0.623   | 0.357 | 0.038 |                | HSP E1   | 1.193   | 0.553 | 0.537 |
|                | PASK     | 0.579   | 0.327 | 0.075 |                | HIST1H4C | 0.868   | 0.428 | 0.455 |
|                | RPL23    | 0.566   | 0.984 | 0.892 |                | HSPB1    | 0.858   | 0.323 | 0.166 |
|                | RIPOR2   | 0.522   | 0.472 | 0.146 |                | TRAF3IP3 | 0.826   | 0.373 | 0.144 |
|                | RPS8     | 0.475   | 1.000 | 0.993 |                | RMRP     | 0.717   | 0.157 | 0.018 |
|                | S1PR1    | 0.447   | 0.287 | 0.039 |                | TECR     | 0.680   | 0.277 | 0.199 |
|                | RPS6     | 0.441   | 0.999 | 0.994 |                | TXNIP    | 0.662   | 0.840 | 0.593 |
|                | TXNIP    | 0.430   | 0.855 | 0.581 |                | CACYBP   | 0.661   | 0.345 | 0.289 |
|                | EIF3E    | 0.424   | 0.841 | 0.543 |                | DNAJA1   | 0.630   | 0.428 | 0.579 |
|                | RPS12    | 0.415   | 1.000 | 0.997 |                | CHORDC1  | 0.628   | 0.283 | 0.199 |
|                | GIMAP7   | 0.410   | 0.756 | 0.450 |                | CD52     | 0.624   | 0.726 | 0.590 |
|                | RPL22    | 0.406   | 0.994 | 0.942 |                | TRAC     | 0.622   | 0.592 | 0.454 |

Supplementary Table 10: Top Gene Markers Expressed for Breast Cell States

| Cell state    | Gene      | Average |       |        | Cell state | Gene     | Average |       |       |
|---------------|-----------|---------|-------|--------|------------|----------|---------|-------|-------|
|               |           | LogFC   | pct1  | pct2   |            |          | LogFC   | pct1  | pct2  |
| CD8-activated | T cells   |         |       |        | NKT        | T cells  |         |       |       |
|               | PLCG2     | 2.493   | 0.868 | 0.358  |            | GZMH     | 1.866   | 0.870 | 0.133 |
|               | IGKC      | 1.311   | 0.560 | 0.404  |            | NKG7     | 1.800   | 0.986 | 0.297 |
|               | CCL5      | 1.277   | 0.984 | 0.654  |            | FGFBP2   | 1.642   | 0.721 | 0.049 |
|               | ZNF683    | 1.106   | 0.297 | 0.029  |            | GNLY     | 1.568   | 0.854 | 0.154 |
|               | TRAF3IP3  | 1.051   | 0.479 | 0.145  |            | CCL4     | 1.327   | 0.798 | 0.252 |
|               | TRG-AS1   | 1.016   | 0.346 | 0.076  |            | GZMB     | 1.116   | 0.776 | 0.160 |
|               | CCL4L2    | 0.998   | 0.303 | 0.093  |            | GZMA     | 1.048   | 0.731 | 0.242 |
|               | ITGA1     | 0.975   | 0.410 | 0.159  |            | ZEB2     | 1.034   | 0.645 | 0.171 |
|               | TRAC      | 0.960   | 0.699 | 0.455  |            | KLRD1    | 1.018   | 0.727 | 0.225 |
|               | RMRP      | 0.932   | 0.242 | 0.019  |            | CD52     | 1.005   | 0.851 | 0.584 |
|               | EVL       | 0.929   | 0.648 | 0.367  |            | C12orf75 | 0.915   | 0.548 | 0.143 |
|               | TRGC2     | 0.884   | 0.386 | 0.158  |            | KLRG1    | 0.901   | 0.413 | 0.058 |
|               | IGHA1     | 0.875   | 0.353 | 0.270  |            | TRGC2    | 0.894   | 0.494 | 0.149 |
|               | CKLF      | 0.865   | 0.402 | 0.169  |            | KLF2     | 0.889   | 0.692 | 0.239 |
|               | LINC00324 | 0.863   | 0.177 | 0.043  |            | ACTB     | 0.888   | 0.928 | 0.850 |
|               | CD8B      | 0.861   | 0.458 | 0.191  |            | FCGR3A   | 0.878   | 0.397 | 0.051 |
|               | JCHAIN    | 0.853   | 0.133 | 0.096  |            | CTSW     | 0.833   | 0.630 | 0.221 |
|               | HSPA1B    | 0.849   | 0.225 | 0.101  |            | PRF1     | 0.805   | 0.615 | 0.186 |
|               | KLRC1     | 0.839   | 0.290 | 0.144  |            | HCST     | 0.803   | 0.790 | 0.518 |
| GPR174        | 0.813     | 0.328   | 0.112 | PLEK   | 0.800      | 0.358    | 0.046   |       |       |
| CD8-Trm       | CD8A      | 1.117   | 0.741 | 0.180  | XCL2       | 1.762    | 0.613   | 0.111 |       |
|               | KLRC1     | 0.958   | 0.378 | 0.069  | TYROBP     | 1.599    | 0.762   | 0.075 |       |
|               | LDLRAD4   | 0.824   | 0.383 | 0.123  | XCL1       | 1.532    | 0.623   | 0.121 |       |
|               | AUTS2     | 0.797   | 0.490 | 0.168  | AREG       | 1.527    | 0.743   | 0.347 |       |
|               | ITGA1     | 0.789   | 0.392 | 0.085  | TNFRSF18   | 1.389    | 0.592   | 0.097 |       |
|               | CD8B      | 0.788   | 0.459 | 0.105  | FCER1G     | 1.380    | 0.661   | 0.052 |       |
|               | LINC01871 | 0.781   | 0.566 | 0.229  | GNLY       | 1.355    | 0.507   | 0.173 |       |
|               | SYTL3     | 0.752   | 0.812 | 0.517  | CMC1       | 1.164    | 0.466   | 0.138 |       |
|               | PGK1      | 0.726   | 0.722 | 0.474  | NFKB1      | 1.094    | 0.636   | 0.265 |       |
|               | CD7       | 0.707   | 0.818 | 0.486  | REL        | 1.047    | 0.764   | 0.482 |       |
|               | PARD6G    | 0.625   | 0.264 | 0.045  | CSF2       | 1.023    | 0.144   | 0.004 |       |
|               | CCL5      | 0.617   | 0.946 | 0.563  | CTSW       | 1.002    | 0.633   | 0.227 |       |
|               | GABARAPL1 | 0.595   | 0.622 | 0.357  | CCL3       | 0.954    | 0.164   | 0.061 |       |
|               | SPRY1     | 0.583   | 0.294 | 0.097  | CD83       | 0.913    | 0.235   | 0.036 |       |
|               | PARP8     | 0.575   | 0.613 | 0.371  | KIT        | 0.887    | 0.239   | 0.017 |       |
|               | METRNL    | 0.573   | 0.702 | 0.398  | KLRD1      | 0.887    | 0.590   | 0.236 |       |
| SLA2          | 0.572     | 0.286   | 0.085 | NFKBIA | 0.866      | 0.732    | 0.487   |       |       |
| SYTL2         | 0.536     | 0.377   | 0.179 | TRDC   | 0.858      | 0.346    | 0.038   |       |       |
| NKAP          | 0.535     | 0.295   | 0.125 | KLRC1  | 0.849      | 0.477    | 0.139   |       |       |
| RGS1          | 0.534     | 0.674   | 0.397 | KLRB1  | 0.821      | 0.817    | 0.434   |       |       |
| CD8-Tem       | GZMK      | 1.919   | 0.833 | 0.119  | GNLY       | 2.602    | 0.968   | 0.133 |       |
|               | HLA-DRB1  | 1.292   | 0.501 | 0.128  | NKG7       | 2.368    | 0.994   | 0.282 |       |
|               | CRTAM     | 1.191   | 0.409 | 0.075  | FGFBP2     | 2.168    | 0.778   | 0.032 |       |
|               | TNFRSF9   | 1.144   | 0.311 | 0.042  | CCL3       | 2.165    | 0.429   | 0.041 |       |
|               | CST7      | 0.996   | 0.866 | 0.467  | GZMB       | 2.117    | 0.924   | 0.138 |       |
|               | CD74      | 0.920   | 0.611 | 0.315  | TYROBP     | 2.053    | 0.824   | 0.045 |       |
|               | SH2D1A    | 0.915   | 0.461 | 0.164  | FCGR3A     | 2.008    | 0.769   | 0.021 |       |
|               | CMC1      | 0.903   | 0.391 | 0.119  | FCER1G     | 1.939    | 0.690   | 0.028 |       |
|               | DUSP2     | 0.891   | 0.830 | 0.520  | SPON2      | 1.894    | 0.694   | 0.075 |       |
|               | HLA-DPB1  | 0.889   | 0.504 | 0.178  | CCL4       | 1.837    | 0.822   | 0.240 |       |
|               | HLA-DRA   | 0.857   | 0.317 | 0.108  | PRF1       | 1.813    | 0.823   | 0.165 |       |
|               | TUBA4A    | 0.794   | 0.697 | 0.478  | KLRD1      | 1.794    | 0.915   | 0.203 |       |
|               | LYST      | 0.740   | 0.396 | 0.147  | KLRF1      | 1.752    | 0.636   | 0.014 |       |
|               | HLA-DPA1  | 0.733   | 0.386 | 0.143  | CTSW       | 1.567    | 0.778   | 0.203 |       |
|               | CEMIP2    | 0.717   | 0.695 | 0.474  | CMC1       | 1.564    | 0.618   | 0.117 |       |
|               | DUSP4     | 0.691   | 0.369 | 0.174  | GZMA       | 1.504    | 0.820   | 0.227 |       |
|               | HLA-DQB1  | 0.686   | 0.264 | 0.069  | CLIC3      | 1.470    | 0.579   | 0.082 |       |
|               | GZMA      | 0.672   | 0.562 | 0.229  | ITGB2      | 1.299    | 0.648   | 0.172 |       |
| CCL4L2        | 0.635     | 0.206   | 0.085 | CD247  | 1.291      | 0.771    | 0.282   |       |       |
| EOMES         | 0.606     | 0.208   | 0.031 | CCL4L2 | 1.289      | 0.324    | 0.083   |       |       |



Supplementary Table 10: Top Gene Markers Expressed for Breast Cell States

| Cell state     | Gene      | Average |       |       |
|----------------|-----------|---------|-------|-------|
|                |           | LogFC   | pct1  | pct2  |
| <b>T cells</b> |           |         |       |       |
| GD-T           | XCL1      | 1.122   | 0.395 | 0.130 |
|                | CEMIP2    | 0.980   | 0.796 | 0.493 |
|                | SMC4      | 0.913   | 0.308 | 0.129 |
|                | GPCPD1    | 0.894   | 0.526 | 0.159 |
|                | LITAF     | 0.877   | 0.802 | 0.411 |
|                | METRNL    | 0.849   | 0.836 | 0.471 |
|                | REL       | 0.845   | 0.824 | 0.486 |
|                | CCDC57    | 0.839   | 0.365 | 0.091 |
|                | TRGC2     | 0.807   | 0.497 | 0.159 |
|                | IKZF2     | 0.790   | 0.327 | 0.046 |
|                | GNLY      | 0.767   | 0.382 | 0.179 |
|                | PIK3R1    | 0.740   | 0.837 | 0.576 |
|                | CD7       | 0.737   | 0.902 | 0.567 |
|                | KLRC2     | 0.737   | 0.250 | 0.051 |
|                | CD55      | 0.717   | 0.656 | 0.360 |
|                | CHPT1     | 0.710   | 0.335 | 0.109 |
|                | TRDC      | 0.699   | 0.240 | 0.043 |
|                | SOX4      | 0.672   | 0.178 | 0.076 |
|                | NR4A2     | 0.665   | 0.567 | 0.288 |
|                | AREG      | 0.664   | 0.595 | 0.354 |
| T-prol         | STMN11    | 2.393   | 0.973 | 0.257 |
|                | TUBB      | 2.105   | 0.942 | 0.227 |
|                | MKI67     | 1.975   | 0.830 | 0.003 |
|                | HIST1H4C1 | 1.918   | 0.861 | 0.452 |
|                | HMGN23    | 1.876   | 0.969 | 0.327 |
|                | TOP2A     | 1.835   | 0.710 | 0.009 |
|                | CENPF     | 1.826   | 0.730 | 0.032 |
|                | TUBA1B1   | 1.812   | 0.981 | 0.543 |
|                | HMGB21    | 1.803   | 0.954 | 0.419 |
|                | ASPM      | 1.663   | 0.687 | 0.004 |
|                | PCLAF     | 1.641   | 0.784 | 0.004 |
|                | TYMS      | 1.556   | 0.745 | 0.008 |
|                | NUSAP1    | 1.553   | 0.776 | 0.034 |
|                | DUT       | 1.527   | 0.846 | 0.163 |
|                | ACTB4     | 1.509   | 0.992 | 0.852 |
|                | PCNA      | 1.364   | 0.730 | 0.090 |
|                | CKS1B     | 1.351   | 0.768 | 0.079 |
|                | SMC42     | 1.346   | 0.799 | 0.128 |
|                | GZMA5     | 1.283   | 0.757 | 0.259 |
|                | HIST1H1B  | 1.223   | 0.417 | 0.010 |

| Cell state           | Gene       | Average |       |       |
|----------------------|------------|---------|-------|-------|
|                      |            | LogFC   | pct1  | pct2  |
| <b>Myeloid cells</b> |            |         |       |       |
| cDC1                 | CPVL       | 2.041   | 0.961 | 0.546 |
|                      | DNASE1L3   | 1.995   | 0.871 | 0.024 |
|                      | CPNE3      | 1.780   | 0.963 | 0.197 |
|                      | IDO1       | 1.775   | 0.815 | 0.060 |
|                      | C1orf54    | 1.683   | 0.954 | 0.253 |
|                      | TACSTD2    | 1.681   | 0.854 | 0.147 |
|                      | S100B      | 1.571   | 0.580 | 0.052 |
|                      | LGALS2     | 1.428   | 0.902 | 0.167 |
|                      | SNX3       | 1.319   | 0.974 | 0.707 |
|                      | CLEC9A     | 1.315   | 0.854 | 0.040 |
|                      | CST3       | 1.315   | 0.991 | 0.936 |
|                      | WDFY4      | 1.305   | 0.889 | 0.098 |
|                      | HLA-DPB1   | 1.217   | 0.996 | 0.853 |
|                      | RAB11FIP1  | 1.216   | 0.911 | 0.251 |
|                      | DAPP1      | 1.139   | 0.852 | 0.132 |
|                      | HLA-DPA1   | 1.026   | 0.994 | 0.868 |
|                      | EEF1B2     | 1.021   | 0.991 | 0.899 |
|                      | PPA1       | 0.990   | 0.943 | 0.404 |
|                      | GPR157     | 0.982   | 0.662 | 0.116 |
|                      | C12orf45   | 0.976   | 0.787 | 0.221 |
| cDC2                 | FCER1A     | 1.796   | 0.829 | 0.146 |
|                      | CD1C       | 1.527   | 0.723 | 0.052 |
|                      | IL1R2      | 1.479   | 0.839 | 0.212 |
|                      | CLEC10A    | 1.278   | 0.783 | 0.165 |
|                      | CST3       | 1.192   | 0.984 | 0.931 |
|                      | AREG       | 1.149   | 0.736 | 0.391 |
|                      | LYZ        | 0.906   | 0.973 | 0.661 |
|                      | HLA-DQA1   | 0.902   | 0.991 | 0.712 |
|                      | HLA-DPB1   | 0.838   | 0.997 | 0.837 |
|                      | LGALS2     | 0.836   | 0.633 | 0.123 |
|                      | HLA-DQB1   | 0.804   | 0.990 | 0.741 |
|                      | TIMP1      | 0.803   | 0.945 | 0.663 |
|                      | CST7       | 0.779   | 0.570 | 0.138 |
|                      | CPVL       | 0.754   | 0.841 | 0.518 |
|                      | CFP        | 0.732   | 0.625 | 0.149 |
|                      | CD1E       | 0.730   | 0.401 | 0.030 |
|                      | CCL22      | 0.725   | 0.328 | 0.064 |
|                      | HLA-DRA    | 0.714   | 0.999 | 0.925 |
|                      | S100A10    | 0.712   | 0.985 | 0.841 |
|                      | AC020656.1 | 0.707   | 0.671 | 0.280 |
| mDC                  | CCL22      | 2.995   | 0.791 | 0.083 |
|                      | BIRC3      | 2.555   | 0.965 | 0.484 |
|                      | CCR7       | 2.451   | 0.965 | 0.211 |
|                      | IDO1       | 2.167   | 0.659 | 0.064 |
|                      | CCL17      | 2.070   | 0.404 | 0.026 |
|                      | LAMP3      | 1.866   | 0.921 | 0.044 |
|                      | TXN        | 1.839   | 0.969 | 0.800 |
|                      | IL7R       | 1.806   | 0.954 | 0.247 |
|                      | DAPP1      | 1.729   | 0.901 | 0.133 |
|                      | CST7       | 1.720   | 0.818 | 0.177 |
|                      | NUB1       | 1.699   | 0.774 | 0.188 |
|                      | MARCKSL1   | 1.633   | 0.884 | 0.299 |
|                      | FSCN1      | 1.593   | 0.741 | 0.147 |
|                      | RAMP1      | 1.526   | 0.629 | 0.087 |
|                      | GADD45A    | 1.525   | 0.677 | 0.183 |
|                      | RAB9A      | 1.430   | 0.864 | 0.289 |
|                      | CRIP1      | 1.424   | 0.778 | 0.280 |
|                      | EBI3       | 1.376   | 0.580 | 0.203 |
|                      | GPR157     | 1.362   | 0.796 | 0.115 |
|                      | CCL19      | 1.361   | 0.297 | 0.008 |

Supplementary Table 10: Top Gene Markers Expressed for Breast Cell States

| Cell state               | Gene     | Average |       |       | Cell state            | Gene       | Average |       |       |
|--------------------------|----------|---------|-------|-------|-----------------------|------------|---------|-------|-------|
|                          |          | LogFC   | pct1  | pct2  |                       |            | LogFC   | pct1  | pct2  |
| <b>Myeloid cells</b>     |          |         |       |       | <b>Myeloid cells</b>  |            |         |       |       |
| <b>pDC</b>               | GZMB     | 2.825   | 0.399 | 0.011 | <b>Mono-classical</b> | CXCL5      | 2.360   | 0.336 | 0.073 |
|                          | IGKC     | 2.557   | 0.696 | 0.409 |                       | SERPINB2   | 2.124   | 0.227 | 0.014 |
|                          | PTGD5    | 2.161   | 0.196 | 0.031 |                       | EREG       | 1.745   | 0.709 | 0.178 |
|                          | JCHAIN   | 2.059   | 0.459 | 0.110 |                       | VCAN       | 1.745   | 0.686 | 0.149 |
|                          | IRF8     | 1.633   | 0.608 | 0.236 |                       | THBS1      | 1.623   | 0.820 | 0.354 |
|                          | DNASE1L3 | 1.622   | 0.446 | 0.037 |                       | S100A9     | 1.473   | 0.627 | 0.284 |
|                          | LGALS2   | 1.549   | 0.372 | 0.179 |                       | FCN1       | 1.346   | 0.606 | 0.102 |
|                          | C1orf54  | 1.394   | 0.338 | 0.265 |                       | LYZ        | 1.322   | 0.915 | 0.661 |
|                          | CLIC3    | 1.377   | 0.318 | 0.007 |                       | S100A8     | 1.265   | 0.436 | 0.146 |
|                          | IRF4     | 1.353   | 0.331 | 0.110 |                       | TIMP1      | 1.085   | 0.937 | 0.657 |
|                          | PLAC8    | 1.344   | 0.311 | 0.055 |                       | AC020656.1 | 1.002   | 0.606 | 0.280 |
|                          | SNX3     | 1.341   | 0.791 | 0.712 |                       | CXCL3      | 0.963   | 0.814 | 0.419 |
|                          | S100B    | 1.323   | 0.216 | 0.061 |                       | S100A12    | 0.876   | 0.251 | 0.018 |
|                          | CLEC9A   | 1.273   | 0.223 | 0.053 |                       | CXCL1      | 0.840   | 0.359 | 0.195 |
|                          | CPNE3    | 1.263   | 0.392 | 0.209 |                       | CD300E     | 0.837   | 0.561 | 0.189 |
|                          | ITM2C    | 1.261   | 0.399 | 0.160 |                       | CYP1B1     | 0.817   | 0.444 | 0.200 |
|                          | TSPAN13  | 1.244   | 0.345 | 0.030 |                       | CCL20      | 0.816   | 0.421 | 0.182 |
|                          | BCL11A   | 1.178   | 0.338 | 0.051 |                       | MT1X       | 0.798   | 0.370 | 0.324 |
|                          | C12orf75 | 1.167   | 0.318 | 0.099 |                       | CXCL2      | 0.781   | 0.865 | 0.514 |
|                          | IRF7     | 1.135   | 0.378 | 0.218 |                       | IL1RN      | 0.778   | 0.436 | 0.196 |
| <b>Mast</b>              | TPSB2    | 3.829   | 0.843 | 0.007 | FABP4                 | 3.578      | 0.605   | 0.193 |       |
|                          | TPSAB1   | 3.647   | 0.816 | 0.007 | APOC1                 | 2.573      | 0.786   | 0.259 |       |
|                          | HPGD     | 3.504   | 0.827 | 0.073 | SPP1                  | 2.017      | 0.476   | 0.116 |       |
|                          | CTSG     | 3.464   | 0.755 | 0.002 | APOE                  | 1.835      | 0.875   | 0.461 |       |
|                          | CPA3     | 3.192   | 0.837 | 0.001 | GPNMB                 | 1.568      | 0.900   | 0.359 |       |
|                          | IL1RL1   | 2.281   | 0.687 | 0.013 | ACP5                  | 1.545      | 0.817   | 0.178 |       |
|                          | CMA1     | 2.278   | 0.488 | 0.001 | LIPA                  | 1.534      | 0.824   | 0.362 |       |
|                          | HDC      | 2.135   | 0.556 | 0.001 | CCL18                 | 1.409      | 0.379   | 0.083 |       |
|                          | ADCYAP1  | 2.117   | 0.270 | 0.001 | CSTB                  | 1.405      | 0.984   | 0.804 |       |
|                          | GATA2    | 2.105   | 0.511 | 0.003 | CTSD                  | 1.382      | 0.964   | 0.710 |       |
|                          | HPGDS    | 2.001   | 0.630 | 0.125 | FABP5                 | 1.349      | 0.896   | 0.567 |       |
|                          | MS4A2    | 1.895   | 0.530 | 0.001 | CHIT1                 | 1.294      | 0.224   | 0.005 |       |
|                          | GCSAML   | 1.846   | 0.461 | 0.001 | MMP9                  | 1.263      | 0.508   | 0.232 |       |
|                          | KIT      | 1.798   | 0.491 | 0.012 | LGALS3                | 1.186      | 0.953   | 0.757 |       |
|                          | FAM107B  | 1.734   | 0.702 | 0.510 | CD36                  | 1.118      | 0.646   | 0.250 |       |
|                          | LGALS3   | 1.577   | 0.818 | 0.763 | CHI3L1                | 1.100      | 0.159   | 0.022 |       |
|                          | ANXA1    | 1.498   | 0.860 | 0.866 | CD52                  | 1.095      | 0.530   | 0.191 |       |
|                          | BATF     | 1.493   | 0.455 | 0.117 | CYP27A1               | 1.094      | 0.584   | 0.048 |       |
|                          | SELENOK  | 1.474   | 0.702 | 0.663 | LPL                   | 1.086      | 0.520   | 0.121 |       |
|                          | LEO1     | 1.473   | 0.423 | 0.110 | PLD3                  | 1.043      | 0.835   | 0.508 |       |
| <b>Mono-nonclassical</b> | LST1     | 2.082   | 0.985 | 0.570 | C3                    | 1.679      | 0.861   | 0.163 |       |
|                          | CD52     | 1.839   | 0.861 | 0.182 | FCGBP                 | 1.381      | 0.509   | 0.119 |       |
|                          | FCGR3A   | 1.602   | 0.942 | 0.345 | SDS                   | 1.367      | 0.714   | 0.219 |       |
|                          | COTL1    | 1.581   | 0.986 | 0.672 | APOE                  | 1.155      | 0.836   | 0.365 |       |
|                          | FCN1     | 1.550   | 0.805 | 0.149 | RGS1                  | 1.049      | 0.915   | 0.499 |       |
|                          | SMIM25   | 1.520   | 0.843 | 0.169 | OLR1                  | 0.945      | 0.695   | 0.259 |       |
|                          | SERPINA1 | 1.489   | 0.946 | 0.397 | CXCR4                 | 0.904      | 0.865   | 0.538 |       |
|                          | STXB2    | 1.405   | 0.872 | 0.275 | YWHAH                 | 0.846      | 0.773   | 0.433 |       |
|                          | IFITM2   | 1.303   | 0.947 | 0.577 | RGS2                  | 0.845      | 0.875   | 0.539 |       |
|                          | CORO1A   | 1.266   | 0.882 | 0.341 | CD81                  | 0.829      | 0.924   | 0.664 |       |
|                          | S100A4   | 1.253   | 0.991 | 0.733 | CREM                  | 0.818      | 0.904   | 0.629 |       |
|                          | LILRA5   | 1.248   | 0.723 | 0.078 | TFRC                  | 0.802      | 0.684   | 0.416 |       |
|                          | CDKN1C   | 1.186   | 0.592 | 0.118 | HLA-DPA1              | 0.790      | 0.985   | 0.834 |       |
|                          | LILRB2   | 1.185   | 0.865 | 0.350 | AXL                   | 0.769      | 0.725   | 0.237 |       |
|                          | CD48     | 1.183   | 0.884 | 0.343 | PLXDC2                | 0.745      | 0.810   | 0.369 |       |
|                          | LYPD2    | 1.182   | 0.226 | 0.000 | ZNF331                | 0.744      | 0.591   | 0.265 |       |
|                          | SPN      | 1.161   | 0.710 | 0.103 | ALOX5AP               | 0.743      | 0.865   | 0.510 |       |
|                          | PLAC8    | 1.146   | 0.519 | 0.041 | ATP1B3                | 0.741      | 0.926   | 0.785 |       |
|                          | IFITM3   | 1.144   | 0.918 | 0.641 | SAT1                  | 0.727      | 1.000   | 0.979 |       |
|                          | AIF1     | 1.140   | 0.987 | 0.808 | CD9                   | 0.724      | 0.770   | 0.344 |       |

Supplementary Table 10: Top Gene Markers Expressed for Breast Cell States

| Cell state           | Gene    | Average LogFC | pct1  | pct2    | Cell state           | Gene     | Average LogFC | pct1  | pct2  |
|----------------------|---------|---------------|-------|---------|----------------------|----------|---------------|-------|-------|
| <b>Myeloid cells</b> |         |               |       |         | <b>Myeloid cells</b> |          |               |       |       |
| Macro-m1-CCL         | CCL4L2  | 1.910         | 0.860 | 0.290   | Macro-ifn            | CXCL10   | 2.991         | 0.479 | 0.037 |
|                      | CCL20   | 1.884         | 0.569 | 0.195   |                      | ISG15    | 2.395         | 0.916 | 0.249 |
|                      | IL1B    | 1.770         | 0.975 | 0.499   |                      | IFIT3    | 2.036         | 0.679 | 0.033 |
|                      | CCL3L1  | 1.607         | 0.805 | 0.278   |                      | RSAD2    | 1.982         | 0.666 | 0.027 |
|                      | CCL4    | 1.488         | 0.919 | 0.405   |                      | IFIT2    | 1.966         | 0.612 | 0.036 |
|                      | G0S2    | 1.412         | 0.728 | 0.368   |                      | IFIT1    | 1.895         | 0.652 | 0.019 |
|                      | IL23A   | 1.335         | 0.150 | 0.016   |                      | MX1      | 1.799         | 0.860 | 0.143 |
|                      | TCHH    | 1.310         | 0.516 | 0.107   |                      | CCL8     | 1.750         | 0.293 | 0.046 |
|                      | OLR1    | 1.297         | 0.801 | 0.339   |                      | IFI44L   | 1.492         | 0.772 | 0.061 |
|                      | IL1A    | 1.249         | 0.574 | 0.120   |                      | IFI6     | 1.452         | 0.790 | 0.204 |
|                      | INHBA   | 1.244         | 0.413 | 0.120   |                      | PARP14   | 1.397         | 0.932 | 0.381 |
|                      | CCL3    | 1.179         | 0.871 | 0.439   |                      | GBP1     | 1.395         | 0.607 | 0.110 |
|                      | CD83    | 1.084         | 0.943 | 0.633   |                      | RNF213   | 1.256         | 0.898 | 0.432 |
|                      | C3      | 1.074         | 0.869 | 0.299   |                      | EIF2AK2  | 1.221         | 0.795 | 0.190 |
|                      | RG51    | 1.031         | 0.937 | 0.579   |                      | MX2      | 1.211         | 0.745 | 0.191 |
|                      | CCR7    | 1.026         | 0.597 | 0.202   |                      | SAMD9L   | 1.196         | 0.648 | 0.076 |
|                      | REL     | 1.022         | 0.978 | 0.809   |                      | XAF1     | 1.147         | 0.688 | 0.079 |
|                      | PLAUR   | 1.004         | 0.967 | 0.813   |                      | EPST11   | 1.131         | 0.788 | 0.171 |
| BCL2A1               | 0.982   | 0.932         | 0.550 | LY6E    | 1.106                | 0.695    | 0.196         |       |       |
| IL6                  | 0.942   | 0.349         | 0.099 | CXCL11  | 1.099                | 0.214    | 0.005         |       |       |
| Macro-m2             | RNASE1  | 2.061         | 0.982 | 0.299   | Neutrophil           | IFITM2   | 3.24614363    | 0.964 | 0.583 |
|                      | HMOX1   | 1.862         | 0.840 | 0.553   |                      | S100A8   | 2.92206456    | 0.805 | 0.176 |
|                      | LYVE1   | 1.828         | 0.809 | 0.112   |                      | S100A9   | 2.436769      | 0.889 | 0.322 |
|                      | SELENOP | 1.824         | 0.922 | 0.300   |                      | CSF3R    | 2.41872518    | 0.633 | 0.249 |
|                      | F13A1   | 1.539         | 0.785 | 0.244   |                      | FCGR3B   | 2.4004261     | 0.439 | 0.003 |
|                      | EMP1    | 1.521         | 0.772 | 0.330   |                      | AQP9     | 2.39023977    | 0.597 | 0.134 |
|                      | MRC1    | 1.437         | 0.920 | 0.338   |                      | SMCHD1   | 2.36911565    | 0.674 | 0.424 |
|                      | CD163   | 1.350         | 0.962 | 0.544   |                      | SLC25A37 | 2.29825404    | 0.624 | 0.32  |
|                      | PLTP    | 1.304         | 0.736 | 0.232   |                      | PI3      | 2.22099347    | 0.156 | 0.01  |
|                      | FOLR2   | 1.234         | 0.789 | 0.279   |                      | KIAA1551 | 2.17056387    | 0.509 | 0.277 |
|                      | PDK4    | 1.199         | 0.469 | 0.193   |                      | MNDA     | 2.12892812    | 0.486 | 0.299 |
|                      | LGMN    | 1.179         | 0.849 | 0.467   |                      | RIPOR2   | 2.03875218    | 0.378 | 0.057 |
|                      | MAN1A1  | 1.159         | 0.788 | 0.344   |                      | FPR1     | 2.00448696    | 0.606 | 0.357 |
|                      | CCL18   | 1.156         | 0.273 | 0.036   |                      | CXCR2    | 1.97998162    | 0.308 | 0.001 |
|                      | STAB1   | 1.152         | 0.806 | 0.312   |                      | S100A12  | 1.97440576    | 0.265 | 0.046 |
|                      | LILRB5  | 1.135         | 0.665 | 0.089   |                      | VNN2     | 1.96970848    | 0.333 | 0.038 |
|                      | DAB2    | 1.099         | 0.867 | 0.440   |                      | PROK2    | 1.96439666    | 0.269 | 0.005 |
|                      | MARCO   | 1.078         | 0.390 | 0.138   |                      | IVNS1ABP | 1.95687179    | 0.606 | 0.484 |
| CD36                 | 1.074   | 0.577         | 0.163 | TMEM154 | 1.94791064           | 0.36     | 0.058         |       |       |
| MAFB                 | 1.017   | 0.933         | 0.616 | S100P   | 1.93535019           | 0.292    | 0.006         |       |       |
| Macro-m2-CXCL        | CCL3L1  | 2.290         | 0.868 | 0.275   | Myeloid-prol         | STMN1    | 2.038         | 0.943 | 0.327 |
|                      | CCL4    | 2.181         | 0.911 | 0.406   |                      | HIST1H4C | 1.980         | 0.734 | 0.361 |
|                      | CCL3    | 2.158         | 0.954 | 0.436   |                      | HMGN2    | 1.808         | 0.943 | 0.576 |
|                      | CCL4L2  | 2.042         | 0.809 | 0.294   |                      | TUBA1B   | 1.567         | 0.970 | 0.841 |
|                      | CXCL3   | 1.945         | 0.959 | 0.447   |                      | HMGB2    | 1.542         | 0.818 | 0.346 |
|                      | CXCL1   | 1.735         | 0.590 | 0.198   |                      | PCLAF    | 1.469         | 0.687 | 0.012 |
|                      | CXCL8   | 1.684         | 0.998 | 0.723   |                      | MKI67    | 1.422         | 0.621 | 0.006 |
|                      | CXCL2   | 1.563         | 0.960 | 0.541   |                      | TOP2A    | 1.419         | 0.599 | 0.013 |
|                      | TNF     | 1.544         | 0.574 | 0.167   |                      | HMGB1    | 1.406         | 0.985 | 0.886 |
|                      | IL1A    | 1.353         | 0.472 | 0.126   |                      | TUBB     | 1.371         | 0.894 | 0.633 |
|                      | IL1B    | 1.347         | 0.851 | 0.507   |                      | TYMS     | 1.345         | 0.638 | 0.019 |
|                      | CCL2    | 1.215         | 0.612 | 0.258   |                      | H2AFZ    | 1.333         | 0.938 | 0.772 |
|                      | GCLM    | 1.104         | 0.830 | 0.386   |                      | CKS1B    | 1.291         | 0.727 | 0.126 |
|                      | EIF4E   | 1.064         | 0.772 | 0.510   |                      | CENPF    | 1.247         | 0.534 | 0.016 |
|                      | ICAM1   | 1.020         | 0.859 | 0.493   |                      | NUSAP1   | 1.234         | 0.601 | 0.036 |
|                      | TXNRD1  | 1.018         | 0.802 | 0.502   |                      | CDK1     | 1.118         | 0.562 | 0.025 |
|                      | MMP9    | 0.988         | 0.489 | 0.230   |                      | DUT      | 1.069         | 0.643 | 0.251 |
|                      | HMOX1   | 0.980         | 0.901 | 0.609   |                      | PTTG1    | 1.064         | 0.623 | 0.136 |
| LUCAT1               | 0.954   | 0.701         | 0.327 | TK1     | 1.041                | 0.571    | 0.020         |       |       |
| JAG1                 | 0.896   | 0.450         | 0.134 | UBE2C   | 1.039                | 0.421    | 0.002         |       |       |

### Supplementary Table 10 – Top Gene Markers Expressed for Breast Cell States

This table lists the top marker genes expressed for each major cell state cluster based on the average log fold-change within the respective cell type and specificity of the gene expressed in the indicated cell state (pct1) compared to the other cell states of the same cell type (pc2). The columns listed (from left to right) indicate the cell state name, the gene names, the average log- fold change, the pct1 value indicating the fraction of cells within the cluster expressing the gene, the pct2 value indicating the fraction of cells in other clusters expressing the gene, and the Bonferroni adjusted p-value.

| <b>Patient ID</b> | <b>Total Counts<br/>(raw)</b> | <b>Total Counts<br/>(post filter)</b> | <b>Total Cells<br/>(raw)</b> | <b>Filtered Cells<br/>(post filter)</b> |
|-------------------|-------------------------------|---------------------------------------|------------------------------|-----------------------------------------|
| P91               | 18962267                      | 17504490                              | 230073                       | 93859                                   |
| P96               | 18597651                      | 18187226                              | 218464                       | 93687                                   |
| P101              | 12129915                      | 11587548                              | 175447                       | 73242                                   |

**Supplementary Table 11 - Quality Control Metrics for smFISH (MERFISH) Data**

The table lists the quality control metrics for the 3 breast tissue samples profiled with the custom 300-gene panel for smFISH analysis (Merscope). The columns listed (from left to right) indicate the Patient ID, the number of transcripts captured under tissue, the number of transcripts after filtering, the number of cells detected and the number of cells after filtering.

Supplementary Table 12 – Custom Targeted Gene Panel for smFISH (MERFISH)

| CellType   | CellState       | Gene      | Cell Type Annotation | Cell State Annotation |
|------------|-----------------|-----------|----------------------|-----------------------|
| adipocytes | adipocytes      | ADIPOQ    | 0                    | 0                     |
| adipocytes | adipocytes      | GPD1      | 1                    | 0                     |
| adipocytes | adipocytes      | LPL       | 1                    | 0                     |
| adipocytes | adipocytes      | PDE3B     | 1                    | 0                     |
| adipocytes | adipocytes      | PLIN1     | 1                    | 0                     |
| B-cells    | b_naive         | CD37      | 0                    | 1                     |
| B-cells    | b_naive         | CD52      | 0                    | 0                     |
| B-cells    | b_naive         | LTB       | 0                    | 1                     |
| B-cells    | B-cells         | CREB3     | 0                    | 0                     |
| B-cells    | B-cells         | TFEB      | 0                    | 0                     |
| B-cells    | bmem_unswitched | BCL2A1    | 0                    | 0                     |
| B-cells    | bmem_unswitched | CD27      | 0                    | 0                     |
| B-cells    | bmem_unswitched | EGR3      | 0                    | 0                     |
| B-cells    | bmem_unswitched | IGHD      | 0                    | 1                     |
| B-cells    | bmem_unswitched | MYC       | 0                    | 0                     |
| B-cells    | cannonical      | CD79A     | 1                    | 0                     |
| B-cells    | cannonical      | IGHM      | 1                    | 1                     |
| B-cells    | cannonical      | MZB1      | 1                    | 1                     |
| B-cells    | plasma_IgA      | IGHA2     | 0                    | 0                     |
| B-cells    | plasma_IgA      | JCHAIN    | 1                    | 1                     |
| B-cells    | plasma_IgG      | IGHG1     | 0                    | 0                     |
| B-cells    | plasma_IgG      | IGHG3     | 1                    | 1                     |
| B-cells    | plasma_IgG      | IGHG4     | 1                    | 1                     |
| basal      | basal           | CARMN     | 0                    | 0                     |
| basal      | basal           | COL17A1   | 1                    | 0                     |
| basal      | basal           | KLF16     | 0                    | 0                     |
| basal      | basal           | LINC01060 | 0                    | 0                     |
| basal      | basal           | SOX9      | 0                    | 0                     |
| basal      | basal           | TEAD3     | 0                    | 0                     |
| basal      | basal           | TFAP2C    | 1                    | 0                     |
| basal      | cannonical      | ACTG2     | 1                    | 1                     |
| basal      | cannonical      | KRT14     | 1                    | 0                     |
| basal      | cannonical      | KRT5      | 1                    | 0                     |
| basal      | cannonical      | LAMA3     | 0                    | 0                     |
| basal      | cannonical      | TUBB2B    | 0                    | 0                     |
| epithelial | cannonical      | EPCAM     | 0                    | 0                     |
| epithelial | cannonical      | KRT19     | 0                    | 0                     |
| epithelial | cannonical      | KRT8      | 0                    | 0                     |
| epithelial | cannonical      | TP63      | 1                    | 0                     |
| fibro      | cannonical      | COL1A1    | 1                    | 0                     |
| fibro      | cannonical      | FBLN1     | 1                    | 0                     |
| fibro      | cannonical      | LUM       | 0                    | 0                     |
| fibro      | cannonical      | TNFAIP6   | 0                    | 0                     |

| CellType | CellState     | Gene      | Cell Type | Cell State |
|----------|---------------|-----------|-----------|------------|
| fibro    | fibro         | CREB3L1   | 0         | 0          |
| fibro    | fibro         | LAMA2     | 1         | 0          |
| fibro    | fibro         | LINC02511 | 0         | 0          |
| fibro    | fibro         | NEGR1     | 0         | 0          |
| fibro    | fibro         | PLAGL1    | 1         | 0          |
| fibro    | fibro         | TWIST2    | 0         | 0          |
| fibro    | fibro_col1a1  | POSTN     | 0         | 0          |
| fibro    | fibro_col1a1  | TAC1      | 0         | 0          |
| fibro    | fibro_col1a1  | TGFBI     | 0         | 0          |
| fibro    | fibro_col1a1  | WNT2      | 0         | 0          |
| fibro    | fibro_pcolce2 | CCN5      | 0         | 0          |
| fibro    | fibro_pcolce2 | PCOLCE2   | 0         | 0          |
| fibro    | fibro_pcolce2 | PDK4      | 0         | 0          |
| fibro    | fibro_pcolce2 | RAMP2     | 0         | 0          |
| fibro    | fibro_pcolce2 | SVEP1     | 0         | 0          |
| fibro    | fibro_pdpn    | CXCL1     | 0         | 0          |
| fibro    | fibro_pdpn    | CXCL2     | 0         | 0          |
| fibro    | fibro_pdpn    | CXCL3     | 0         | 0          |
| fibro    | fibro_pdpn    | CXCL8     | 0         | 0          |
| fibro    | fibro_pdpn    | IL6       | 0         | 0          |
| Immune   | cannonical    | PTPRC     | 0         | 0          |
| lumhr    | cannonical    | AGR2      | 0         | 0          |
| lumhr    | cannonical    | AGR3      | 0         | 0          |
| lumhr    | cannonical    | ANKRD30A  | 1         | 0          |
| lumhr    | cannonical    | AREG      | 1         | 0          |
| lumhr    | cannonical    | DNAJC12   | 1         | 0          |
| lumhr    | cannonical    | RASEF     | 1         | 0          |
| lumhr    | cannonical    | TMC5      | 0         | 0          |
| lumhr    | lumhr         | AR        | 0         | 0          |
| lumhr    | lumhr         | BATF      | 1         | 0          |
| lumhr    | lumhr         | ESR1      | 0         | 0          |
| lumhr    | lumhr         | GATA3     | 1         | 0          |
| lumhr    | lumhr         | PGR       | 0         | 0          |
| lumhr    | lumhr         | TBX3      | 0         | 0          |
| lumhr    | lumhr         | TTC6      | 0         | 0          |
| lumhr    | lumhr_egln3   | EGLN3     | 0         | 0          |
| lumhr    | lumhr_fasn    | CA2       | 0         | 0          |
| lumhr    | lumhr_fasn    | FASN      | 0         | 0          |
| lumhr    | lumhr_fasn    | MYBPC1    | 0         | 0          |
| lumhr    | lumhr_pip     | SERPINA1  | 0         | 1          |
| lumhr    | lumhr_pip     | TFPI2     | 0         | 1          |



| CellType | CellState        | Gene      | Cell Type | Cell State |
|----------|------------------|-----------|-----------|------------|
| lumsec   | cannonical       | ALDH1A3   | 1         | 1          |
| lumsec   | cannonical       | CCL28     | 1         | 0          |
| lumsec   | cannonical       | KRT15     | 1         | 0          |
| lumsec   | cannonical       | LTF       | 1         | 1          |
| lumsec   | cannonical       | MMP7      | 0         | 0          |
| lumsec   | cannonical       | PIGR      | 1         | 0          |
| lumsec   | cannonical       | SLPI      | 1         | 1          |
| lumsec   | lumsec           | EHF       | 0         | 0          |
| lumsec   | lumsec           | ELF5      | 1         | 1          |
| lumsec   | lumsec           | GABRP     | 1         | 1          |
| lumsec   | lumsec           | GRHL1     | 0         | 0          |
| lumsec   | lumsec           | NR2F6     | 0         | 0          |
| lumsec   | lumsec_hla       | AQP3      | 0         | 1          |
| lumsec   | lumsec_hla       | CCL20     | 0         | 1          |
| lumsec   | lumsec_hla       | RBP1      | 0         | 1          |
| lumsec   | lumsec_KIT       | HES1      | 0         | 0          |
| lumsec   | lumsec_KIT       | KIT       | 0         | 0          |
| lumsec   | lumsec_krt23     | KRT23     | 0         | 1          |
| lumsec   | lumsec_lactation | CSN1S1    | 0         | 0          |
| lumsec   | lumsec_lactation | CSN3      | 0         | 0          |
| lumsec   | lumsec_lactation | LALBA     | 0         | 0          |
| lumsec   | lumsec_prol      | STMN1     | 0         | 1          |
| lumsec   | lumsec_prol      | TYMS      | 0         | 1          |
| lymph    | cannonical       | MMRN1     | 1         | 0          |
| lymph    | cannonical       | PECAM1    | 0         | 0          |
| lymph    | cannonical       | PGM5      | 1         | 0          |
| lymph    | cannonical       | PROX1     | 1         | 0          |
| lymph    | cannonical       | SCN3B     | 1         | 0          |
| lymph    | cannonical       | TBX1      | 1         | 0          |
| lymph    | lymph            | HMGB3     | 0         | 0          |
| lymph    | lymph            | KLHL4     | 0         | 0          |
| lymph    | lymph            | LINC02147 | 0         | 0          |
| lymph    | lymph            | NR2F2     | 0         | 0          |
| lymph    | lymph            | PKHD1L1   | 0         | 0          |
| lymph    | lymph            | RHOJ      | 0         | 0          |
| lymph    | lymph-immune     | ACKR4     | 0         | 0          |
| lymph    | lymph-immune     | PTGS2     | 0         | 0          |
| lymph    | lymph-immune     | TGM2      | 0         | 0          |
| lymph    | lymph-major      | FABP4     | 0         | 0          |
| lymph    | lymph-major      | LYVE1     | 0         | 0          |
| lymph    | lymph-valve      | CLDN11    | 0         | 1          |
| lymph    | lymph-valve      | MYLIP     | 0         | 1          |
| lymph    | lymph-valve      | SCG3      | 0         | 1          |

| CellType | CellState    | Gene     | Cell Type | Cell State |
|----------|--------------|----------|-----------|------------|
| mast     | cannonical   | CD69     | 0         | 0          |
| mast     | cannonical   | CPA3     | 0         | 0          |
| mast     | cannonical   | HPGD     | 0         | 0          |
| mast     | cannonical   | HPGDS    | 0         | 0          |
| mast     | cannonical   | TPSB2    | 0         | 0          |
| myeloid  | cannonical   | C1QA     | 1         | 0          |
| myeloid  | cannonical   | C1QB     | 1         | 0          |
| myeloid  | cannonical   | C1QC     | 1         | 0          |
| myeloid  | cannonical   | CD14     | 1         | 0          |
| myeloid  | cannonical   | CD163    | 1         | 0          |
| myeloid  | cannonical   | CD68     | 0         | 0          |
| myeloid  | cannonical   | LYZ      | 1         | 0          |
| myeloid  | cannonical   | MSR1     | 0         | 0          |
| myeloid  | cDC1         | CLEC9A   | 0         | 0          |
| myeloid  | cDC1         | WDFY4    | 0         | 0          |
| myeloid  | cDC1         | XCR1     | 0         | 0          |
| myeloid  | cDC2         | CCL21    | 0         | 0          |
| myeloid  | cDC2         | CD1C     | 0         | 1          |
| myeloid  | cDC2         | CLEC10A  | 0         | 1          |
| myeloid  | cDC2         | FCER1A   | 0         | 1          |
| myeloid  | macro_ifn_m2 | IFIT1    | 0         | 0          |
| myeloid  | macro_ifn_m2 | STAT1    | 0         | 0          |
| myeloid  | macro_ifn_m2 | XAF1     | 0         | 0          |
| myeloid  | macro_lipo   | APOC1    | 0         | 1          |
| myeloid  | macro_lipo   | SPP1     | 0         | 0          |
| myeloid  | macro_lipo   | TREM2    | 0         | 1          |
| myeloid  | macro_m1     | APOE     | 0         | 0          |
| myeloid  | macro_m1     | C3       | 0         | 1          |
| myeloid  | macro_m1     | RGS1     | 0         | 1          |
| myeloid  | macro_m2     | MRC1     | 0         | 1          |
| myeloid  | macro_m2     | RNASE1   | 0         | 1          |
| myeloid  | macro_m2     | SELENOP  | 0         | 1          |
| myeloid  | mast         | HDC      | 0         | 0          |
| myeloid  | mast         | IL18R1   | 0         | 0          |
| myeloid  | mast         | NTM      | 0         | 0          |
| myeloid  | mast         | SYTL3    | 0         | 0          |
| myeloid  | mDC          | CCL19    | 0         | 0          |
| myeloid  | mDC          | CCL22    | 0         | 0          |
| myeloid  | mDC          | LAMP3    | 0         | 0          |
| myeloid  | mono_active  | CXCL5    | 0         | 0          |
| myeloid  | mono_active  | SERPINB2 | 0         | 0          |
| myeloid  | mono_naive   | TESC     | 0         | 0          |

| CellType | CellState  | Gene     | Cell Type | Cell State |
|----------|------------|----------|-----------|------------|
| myeloid  | Myeloid    | ARID3A   | 0         | 0          |
| myeloid  | Myeloid    | MAF      | 0         | 0          |
| myeloid  | Myeloid    | MAFB     | 1         | 0          |
| myeloid  | pDC        | SPIB     | 0         | 0          |
| myeloid  | pDC        | TPM2     | 0         | 0          |
| myeloid  | pDC        | TSPAN13  | 0         | 0          |
| peri     | cannonical | AVPR1A   | 1         | 0          |
| peri     | cannonical | EDNRA    | 1         | 0          |
| peri     | cannonical | MCAM     | 1         | 1          |
| peri     | cannonical | PLN      | 0         | 0          |
| peri     | cannonical | RGS5     | 1         | 1          |
| peri     | cannonical | SSTR2    | 0         | 0          |
| peri     | peri       | ADGRL3   | 0         | 0          |
| peri     | peri       | COL25A1  | 1         | 1          |
| peri     | peri       | RGS6     | 1         | 1          |
| peri     | peri       | SOX5     | 0         | 0          |
| peri     | peri       | TBX2     | 1         | 0          |
| peri     | peri_CREM  | CREM     | 0         | 0          |
| peri     | peri_CREM  | SLC25A4  | 0         | 0          |
| peri     | peri_CREM  | SYNM     | 0         | 1          |
| peri     | peri_CREM  | ZNF331   | 0         | 0          |
| peri     | peri_imm   | EMP3     | 0         | 0          |
| peri     | peri_imm   | GYPC     | 0         | 0          |
| peri     | peri_imm   | PSME2    | 0         | 0          |
| peri     | peri_imm   | SERPINE2 | 0         | 0          |
| peri     | peri_myo   | EGR1     | 0         | 0          |
| peri     | peri_myo   | PLAC9    | 0         | 0          |
| peri     | peri_myo   | RGS16    | 0         | 0          |
| prol     | prol       | MKI67    | 0         | 1          |
| prol     | prol       | PCNA     | 0         | 1          |
| prol     | prol       | TOP2A    | 0         | 1          |
| T-cells  | cannonical | CCL5     | 1         | 1          |
| T-cells  | cannonical | CD2      | 1         | 1          |
| T-cells  | cannonical | CD3D     | 1         | 1          |
| T-cells  | cannonical | CD3G     | 0         | 0          |
| T-cells  | cannonical | CD4      | 1         | 1          |
| T-cells  | cannonical | CD8A     | 1         | 1          |
| T-cells  | cannonical | CD8B     | 0         | 0          |
| T-cells  | cannonical | GZMB     | 0         | 0          |
| T-cells  | cannonical | IL7R     | 1         | 0          |
| T-cells  | cannonical | NKG7     | 1         | 0          |
| T-cells  | cannonical | TRBC1    | 0         | 0          |

| CellType | CellState   | Gene     | Cell Type | Cell State |
|----------|-------------|----------|-----------|------------|
| T-cells  | CD4_naive   | CCR7     | 0         | 1          |
| T-cells  | CD4_naive   | SELL     | 0         | 1          |
| T-cells  | CD4_PLCG2   | CD40LG   | 0         | 0          |
| T-cells  | CD4_PLCG2   | PLCG2    | 0         | 0          |
| T-cells  | CD4_Th1     | CCR6     | 0         | 0          |
| T-cells  | CD4_Th1like | PGAP1    | 0         | 0          |
| T-cells  | CD4_Treg    | CTLA4    | 0         | 0          |
| T-cells  | CD4_Treg    | FOXP3    | 0         | 0          |
| T-cells  | CD4_Treg    | TBC1D4   | 0         | 0          |
| T-cells  | CD8_TEM     | CRTAM    | 0         | 0          |
| T-cells  | CD8_TEM     | EOMES    | 0         | 1          |
| T-cells  | CD8_TEM     | GZMK     | 0         | 1          |
| T-cells  | CD8_TEM     | TNFRSF9  | 0         | 1          |
| T-cells  | CD8_TRM     | AUTS2    | 0         | 0          |
| T-cells  | CD8_TRM     | ITGA1    | 0         | 1          |
| T-cells  | CD8_TRM     | KLRC1    | 0         | 1          |
| T-cells  | CD8_ZNF683  | ZNF683   | 0         | 1          |
| T-cells  | GD          | CCDC57   | 0         | 0          |
| T-cells  | GD          | GPCPD1   | 0         | 0          |
| T-cells  | NK          | FCER1G   | 0         | 1          |
| T-cells  | NK          | KLRF1    | 0         | 1          |
| T-cells  | NK/ILCs     | TNFRSF18 | 0         | 0          |
| T-cells  | NK/ILCs     | TRDC     | 0         | 0          |
| T-cells  | NKT         | GNLY     | 0         | 0          |
| T-cells  | NKT         | KLRG1    | 0         | 0          |
| T-cells  | t_prol      | CENPF    | 0         | 0          |
| T-cells  | t_prol      | ZWINT    | 0         | 0          |
| T-cells  | T-cells     | ARHGAP15 | 0         | 0          |
| T-cells  | T-cells     | ELF1     | 0         | 0          |
| T-cells  | T-cells     | IKZF1    | 0         | 0          |
| T-cells  | T-cells     | PRDM1    | 0         | 0          |
| T-cells  | T-cells     | PTPRC    | 0         | 0          |
| T-cells  | T-cells     | RUNX2    | 0         | 0          |
| T-cells  | T-cells     | SKAP1    | 0         | 0          |
| T-cells  | T-cells     | TCF7L2   | 0         | 0          |
| T-cells  | T-cells     | THEMIS   | 0         | 0          |
| T-cells  | T-cells     | ZNF831   | 0         | 0          |
| vas      | cannonical  | AQP1     | 1         | 0          |
| vas      | cannonical  | CSF3     | 0         | 0          |
| vas      | cannonical  | PGF      | 0         | 0          |
| vas      | vas         | BTNL9    | 1         | 0          |
| vas      | vas         | IRF7     | 1         | 0          |
| vas      | vas         | MECOM    | 0         | 0          |
| vas      | vas         | PTPRB    | 0         | 0          |
| vas      | vas         | SMAD1    | 0         | 0          |

| CellType | CellState     | Gene   | Cell Type | Cell State |
|----------|---------------|--------|-----------|------------|
| vas      | vas-arterial  | GJA4   | 0         | 1          |
| vas      | vas-arterial  | HEY1   | 1         | 1          |
| vas      | vas-arterial  | IGFBP3 | 0         | 0          |
| vas      | vas-arterial  | SOX17  | 1         | 1          |
| vas      | vas-capillary | CA4    | 0         | 1          |
| vas      | vas-capillary | RGCC   | 1         | 1          |
| vas      | vas-veinous   | ACKR1  | 1         | 1          |
| vas      | vas-veinous   | RAMP3  | 0         | 1          |
| vas      | vas-veinous   | SELE   | 0         | 0          |
| vas      | vas-veinous   | SELP   | 1         | 1          |

### Supplementary Table 12 – Custom Targeted Gene Panel for smFISH (MERFISH)

This table lists the custom panel of 266 genes that were selected to distinguish a subset of cell types and cell states identified by top marker genes expressed in the scRNA-seq data. The table lists the cell types, cell state and gene name, and also shows which markers were used to identify cell types and cell states in the final annotation analysis after cell segmentation.
